# Supplementary material
Source: PubMed Central journal article supplement (PMC3266994)
Supplement: NIHMS347000-supplement-1_si_001.pdf [file NIHMS347000-supplement-1_si_001.pdf]

**Total Synthesis of Oxidized Welwitindolinones and  
(-)-N-Methylwelwitindolinone C Isonitrile**

Kyle W. Quasdorf, Alexander D. Hutters, Michael W. Lodewyk<sup>†</sup>,  
Dean J. Tantillo<sup>†</sup>, and Neil K. Garg\*

*Department of Chemistry and Biochemistry, University of California, Los Angeles, CA 90095*

*and*

*<sup>†</sup>Department of Chemistry, University of California, Davis, One Shields Avenue, Davis, CA  
95616*

Supporting Information – Table of Contents

|                                                          |            |
|----------------------------------------------------------|------------|
| <b>Materials and Methods</b> .....                       | <b>S2</b>  |
| <b>Complete Reference 4s from manuscript</b> .....       | <b>S2</b>  |
| <b>Experimental Procedures</b> .....                     | <b>S3</b>  |
| <b>Computational Data</b> .....                          | <b>S9</b>  |
| <b><sup>1</sup>H and <sup>2</sup>H NMR Spectra</b> ..... | <b>S37</b> |
| <b><sup>13</sup>C NMR Spectra</b> .....                  | <b>S49</b> |
| <b>References</b> .....                                  | <b>S58</b> |

**Materials and Methods.** Unless stated otherwise, reactions were conducted in flame-dried glassware under an atmosphere of nitrogen using anhydrous solvents (either freshly distilled or passed through activated alumina columns). All commercially available reagents were used as received unless otherwise specified. (*S*)-carvone was obtained from Aldrich. 5-bromoindole was obtained from Biosynth. NaNH<sub>2</sub> was obtained from Alfa Aesar. Comins' reagent was obtained from Aldrich. Hexamethylditin was obtained from Aldrich. Tetrakis(triphenylphosphine)palladium(0) was obtained from Strem. Anhydrous CuCl<sub>2</sub> was obtained from Aldrich. Trichloroacetyl isocyanate was obtained from Aldrich. LiEt<sub>3</sub>BD ("super deuteride") was obtained from Aldrich. AgOTf was obtained from Strem. Bathophenanthroline was obtained from Alfa Aesar. *O,O*-di(2-pyridinyl) thiocarbonate was obtained from Aldrich. 2-Iodoxybenzoic acid (IBX) and Dess–Martin periodinane were prepared from known literature procedures.<sup>1,2</sup> *t*-BuOH was distilled from CaH<sub>2</sub> and stored in a Schlenk tube prior to use. 1,4-dioxane was distilled from Na/benzophenone prior to use. 1,2-dichloroethane was distilled from P<sub>2</sub>O<sub>5</sub> and stored in a Schlenk tube over 4Å molecular sieves prior to use. Unless stated otherwise, reactions were performed at room temperature (rt, approximately 23 °C). Thin-layer chromatography (TLC) was conducted with EMD gel 60 F254 pre-coated plates (0.25 mm) and visualized using a combination of UV, anisaldehyde, iodine, and potassium permanganate staining. Silicycle silica gel 60 (particle size 0.040–0.063 mm) was used for flash column chromatography. <sup>1</sup>H NMR spectra were recorded on Bruker spectrometers (500 MHz). Data for <sup>1</sup>H spectra are reported as follows: chemical shift (δ ppm), multiplicity, coupling constant (Hz), integration and are referenced to the residual solvent peak 7.26 ppm for CDCl<sub>3</sub> and 5.32 ppm for CD<sub>2</sub>Cl<sub>2</sub>. Data for <sup>2</sup>H NMR spectra are reported as follow: chemical shift (δ ppm, at 77 MHz), multiplicity, coupling constant, integration and are referenced to the residual solvent peak 7.26 ppm for CDCl<sub>3</sub>. <sup>13</sup>C NMR spectra are reported in terms of chemical shift (at 125 MHz) and are referenced to the residual solvent peak 77.16 ppm for CDCl<sub>3</sub>, 53.84 for CD<sub>2</sub>Cl<sub>2</sub>, and 128.06 for C<sub>6</sub>D<sub>6</sub>. IR spectra were recorded on a Perkin-Elmer 100 spectrometer and are reported in terms of frequency absorption (cm<sup>-1</sup>). Optical rotations were measured with a Rudolf Autopol IV Automatic Polarimeter. Uncorrected melting points were measured with a Mel-Temp II melting point apparatus and a Fluke 50S thermocouple. High resolution mass spectra were obtained from the UC Irvine Mass Spectrometry Facility.

#### **Complete Reference 4s from manuscript:**

Freeman, D. B.; Holubec, A. A.; Weiss, M. W.; Dixon, J. A.; Kafefuda, A.; Ohtsuka, M.; Inoue, M.; Vaswani R. G.; Ohki, H.; Doan, B. D.; Reisman, S. E.; Stoltz, B. M.; Day, J. J.; Tao, R. N.; Dieterich, N. A.; Wood, J. L. *Tetrahedron* **2010**, *66*, 6647–6655.

## Experimental Procedures.

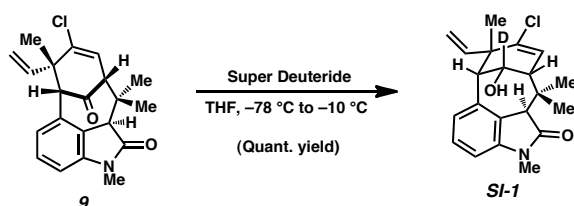

**SI-1.** To a solution of ketone **9**<sup>3</sup> (367 mg, 1.03 mmol, 1.0 equiv) in THF (34.0 mL) at -78 °C was added a solution of LiEt<sub>3</sub>BD (“super deuteride”, 1.0 M in THF, 1.13 mL, 1.13 mmol, 1.1 equiv) in a dropwise manner. After stirring at -78 °C for 10 min the reaction was warmed to -10 °C and stirred for an additional 1 h. The reaction was then quenched with the addition of MeOH (5 mL) and warmed to room temperature. The resulting mixture was transferred to a separatory funnel with EtOAc (50 mL), H<sub>2</sub>O (15 mL), and brine (25 mL). The resulting biphasic mixture was extracted with EtOAc (3 x 50 mL), the organic layers were combined, dried over MgSO<sub>4</sub>, and evaporated under reduced pressure. The resulting residue was purified by flash chromatography (1:1:1 hexanes:CH<sub>2</sub>Cl<sub>2</sub>:Et<sub>2</sub>O) to afford **SI-1** (370 mg, quant. yield) as a white solid. **SI-1**: R<sub>f</sub> 0.12 (2:1:1 hexanes:CH<sub>2</sub>Cl<sub>2</sub>:Et<sub>2</sub>O); <sup>1</sup>H NMR (500 MHz, CDCl<sub>3</sub>): δ 7.17 (ddd, *J* = 7.8, 7.7, 0.9, 1H), 6.70 (d, *J* = 7.8, 0.9 1H), 6.68 (d, *J* = 7.7, 1H), 6.19 (d, *J* = 6.7, 1H), 5.23 (dd, *J* = 17.4, 10.7, 1H), 5.03 (dd, *J* = 17.4, 0.7, 1H), 4.89 (dd, *J* = 10.7, 0.7, 1H), 3.62 (s, 1H), 3.18 (s, 3H), 3.13 (d, *J* = 0.9, 1H), 2.57 (dd, *J* = 6.7, 0.9, 1H), 1.57 (s, 3H), 1.53 (s, 3H), 0.95 (s, 3H).

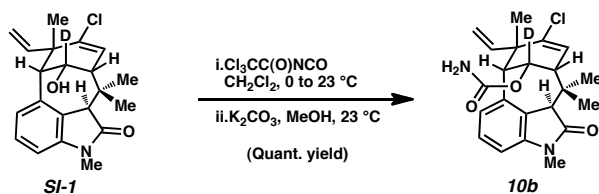

**Carbamate 10b.** To a solution of **SI-1** (370 mg, 1.03 mmol, 1.0 equiv) in CH<sub>2</sub>Cl<sub>2</sub> (21.0 mL) at 0 °C was added trichloroacetyl isocyanate (129 μL, 1.08 mmol, 1.05 equiv) in a dropwise manner. The resulting mixture was stirred at 0 °C for 5 min, and then at room temperature for an additional 20 min. The solvent was evaporated under reduced pressure. To the resulting residue was added MeOH (21.0 mL) and solid K<sub>2</sub>CO<sub>3</sub> (784 mg, 5.67 mmol, 5.5 equiv) in one portion. The reaction was flushed with N<sub>2</sub> and left to stir at room temperature for 3.5 h. The reaction was quenched with a saturated aqueous NH<sub>4</sub>Cl solution (50 mL) and the resulting biphasic mixture was transferred to a separatory funnel with EtOAc (50 mL) and H<sub>2</sub>O (25 mL). After extracting with EtOAc (3 x 50 mL), the organic layers were combined, dried over MgSO<sub>4</sub>, and evaporated under reduced pressure. The resulting residue was purified by flash chromatography (1:1 hexanes:EtOAc) to afford carbamate **10b** (416 mg, quant. yield) as a white solid. Carbamate **10b**: mp: 135 °C; R<sub>f</sub> 0.41 (1:1 hexanes:EtOAc); <sup>1</sup>H NMR (500 MHz, CDCl<sub>3</sub>): δ 7.13 (dd, *J* = 7.8, 7.7, 1H), 6.68 (d, *J* = 7.7, 1H), 6.61 (d, *J* = 7.8, 1H), 6.18 (d, *J* = 6.7, 1H), 5.19 (dd, *J* = 17.3,

10.6, 1H), 5.04 (dd,  $J = 17.3, 0.8$ , 1H), 4.91 (dd,  $J = 10.6, 0.8$ , 1H), 4.46 (br. s, 2H), 3.62 (s, 3H), 3.17 (s, 3H), 3.14 (s, 1H), 2.77 (dd,  $J = 6.7, 0.9$ , 1H), 1.60 (s, 3H), 1.52 (s, 3H), 0.87 (s, 3H);  $^2\text{H}$  NMR (77 MHz,  $\text{CDCl}_3$ )  $\delta$  5.48 (br. s, 1D);  $^{13}\text{C}$  NMR (21 of 22 observed, 125 MHz,  $\text{CDCl}_3$ ):  $\delta$  176.3, 155.9, 144.3, 141.2, 141.0, 136.9, 127.7, 127.3, 126.4, 125.7, 114.7, 106.6, 55.8, 52.6, 50.6, 49.0, 38.7, 28.0, 26.3, 26.2, 22.7; IR (film): 3493, 3351, 2929, 2875, 1723, 1698, 1609, 1469, 1375, 1084  $\text{cm}^{-1}$ ; HRMS-ESI ( $m/z$ )  $[\text{M} + \text{Na}]^+$  calcd for  $\text{C}_{22}\text{H}_{24}\text{DN}_2\text{O}_3\text{ClNa}$ , 424.1514; found 424.1504;  $[\alpha]^{24.2}_{\text{D}}$   $-151.0^\circ$  ( $c = 1.000$ ,  $\text{CH}_2\text{Cl}_2$ ).

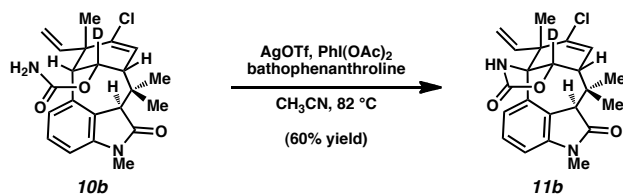

**Oxazolidinone 11b.** A 20 mL scintillation vial containing  $\text{CH}_3\text{CN}$  and two separate 20 mL scintillation vials each charged with bathophenanthroline (40.1 mg, 0.124 mmol, 0.5 equiv) were transferred into the glovebox. AgOTf (32.0 mg, 0.124 mmol, 0.5 equiv) and  $\text{CH}_3\text{CN}$  (7.00 mL) were added to each vial containing the bathophenanthroline, and the resulting suspensions were stirred at room temperature for 20 min. Next, two additional 20 mL scintillation vials each containing carbamate **10b** (100 mg, 0.249 mmol, 1.0 equiv) and PhI(OAc)<sub>2</sub> (160 mg, 0.498 mmol, 2.0 equiv) were transferred into the glovebox and a AgOTf/bathophenanthroline suspension was added to each of these vials. The vials were then sealed, removed from the glovebox, and the resulting mixtures were allowed to stir at 82 °C. After 24 h, the reactions were cooled to room temperature and combined then filtered through a plug of silica gel (EtOAc eluent, 50 mL). The filtrate was evaporated under reduced pressure, and the resulting residue was purified by flash chromatography (4:1 benzene:EtOAc) to afford oxazolidinone **11b** (59.3 mg, 60% yield) as a white solid and recovered ketone **9** (7.0 mg, 8% yield) as a white solid. Oxazolidinone **11b**: mp: 329 °C;  $R_f$  0.35 (2:1 benzene:EtOAc);  $^1\text{H}$  NMR (500 MHz,  $\text{CDCl}_3$ ):  $\delta$  7.53 (br. s, 1H), 7.15 (ddd,  $J = 8.3, 7.6, 0.7$  1H), 6.72 (d,  $J = 8.3$ , 1H), 6.71 (d,  $J = 7.6$ , 1H), 6.29 (d,  $J = 5.9$ , 1H), 5.19–5.05 (m, 3H), 3.62 (s, 1H), 3.19 (s, 3H), 2.97 (d,  $J = 5.9$ , 1H), 1.65 (s, 3H), 1.56 (s, 3H), 1.04 (s, 3H);  $^2\text{H}$  NMR (77 MHz,  $\text{CDCl}_3$ )  $\delta$  5.02 (br. s, 1D);  $^{13}\text{C}$  NMR (125 MHz,  $\text{CDCl}_3$ ):  $\delta$  174.9, 159.2, 144.2, 141.1, 140.6, 136.8, 128.2, 125.9, 125.5, 123.9, 116.4, 107.4, 80.9 (t,  $J_{\text{C-D}} = 21.9$ ), 69.8, 54.2, 52.1, 49.4, 38.6, 27.3, 26.4, 22.0, 20.2; IR (film): 3280, 2997, 1757, 1707, 1610, 1460, 1346  $\text{cm}^{-1}$ ; HRMS-ESI ( $m/z$ )  $[\text{M} + \text{Na}]^+$  calcd for  $\text{C}_{22}\text{H}_{22}\text{DN}_2\text{O}_3\text{ClNa}$ , 422.1358; found 422.1357;  $[\alpha]^{25.2}_{\text{D}}$   $-147.6^\circ$  ( $c = 1.000$ ,  $\text{CH}_2\text{Cl}_2$ ).

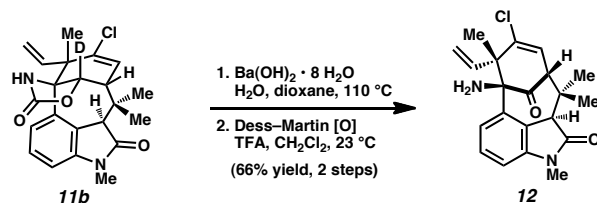

**Aminoketone 12.** A Schlenk tube was charged with oxazolidinone **11b** (20 mg, 0.050 mmol, 1.0 equiv) and Ba(OH)<sub>2</sub> · 8 H<sub>2</sub>O (79 mg, 0.250 mmol, 5.0 equiv). The reaction vessel was then evacuated and backfilled with N<sub>2</sub> five times. A 2:1 mixture of 1,4-dioxane:H<sub>2</sub>O (1.9 mL) that had been taken through seven freeze-pump-thaw cycles prior to use was then added to the Schlenk tube. The vessel was sealed, and the reaction vessel was heated to 110 °C. After 14 h, the reaction was cooled to room temperature, and the contents were transferred to a test tube with EtOAc (6 mL), H<sub>2</sub>O (3 mL), and brine (3 mL). The resulting biphasic mixture was extracted with EtOAc (5 x 5 mL). The organic layers were combined, dried over MgSO<sub>4</sub>, and evaporated under reduced pressure to afford the crude product, which was used directly in the subsequent reaction.

To the crude residue was added CH<sub>2</sub>Cl<sub>2</sub> (1.1 mL) and TFA (4.2 μL, 0.0413 mmol, 1.1 equiv). The resulting solution was stirred at room temperature for 2 min. Dess–Martin periodinane (28 mg, 0.065 mmol, 1.3 equiv) was then added in one portion, and the vial was flushed with N<sub>2</sub>. After stirring at room temperature for 17 h, the reaction was diluted with a 1:1 mixture of saturated aqueous solutions of NaHCO<sub>3</sub> and Na<sub>2</sub>S<sub>2</sub>O<sub>3</sub> (2 mL). The resulting biphasic mixture was vigorously stirred until both layers were no longer cloudy. The resulting mixture was transferred to a test tube with EtOAc (2 mL). After extracting with EtOAc (4 x 2 mL), the organic layers were combined, dried over MgSO<sub>4</sub>, and evaporated under reduced pressure. The resulting residue was purified by flash chromatography (4:1 hexanes:EtOAc) to afford aminoketone **12** (12.3 mg, 66% yield, over two steps) as an amorphous solid. Aminoketone **12**: R<sub>f</sub> 0.42 (1:1 hexanes:EtOAc); <sup>1</sup>H NMR (500 MHz, CDCl<sub>3</sub>): δ 7.34 (d, *J* = 8.4, 1H), 7.27 (dd, *J* = 8.4, 7.6, 1H), 6.75 (d, *J* = 7.6, 1H), 6.18 (d, *J* = 4.2, 1H), 5.44 (dd, *J* = 17.3, 10.9, 1H), 5.22 (d, *J* = 10.9, 1H), 5.17 (d, *J* = 17.3, 1H), 3.82 (s, 1H), 3.18 (s, 3H), 3.15 (d, *J* = 4.2, 1H), 1.71 (br. s, 2H), 1.69 (s, 3H), 1.31 (s, 3H), 0.78 (s, 3H); <sup>13</sup>C NMR (125 MHz, CDCl<sub>3</sub>): δ 207.4, 174.7, 144.1, 140.6, 138.9, 135.2, 128.2, 124.2, 123.8, 123.7, 116.2, 107.7, 71.8, 62.8, 56.7, 53.8, 40.0, 26.4, 25.9, 21.6, 20.6; IR (film): 2973, 1709, 1698, 1609, 1583, 1457 cm<sup>-1</sup>; HRMS-ESI (*m/z*) [M + H]<sup>+</sup> calcd for C<sub>21</sub>H<sub>24</sub>N<sub>2</sub>O<sub>2</sub>Cl, 371.1526; found 371.1516; [α]<sub>D</sub><sup>23.8</sup> -70.2° (*c* = 1.000, CHCl<sub>3</sub>).

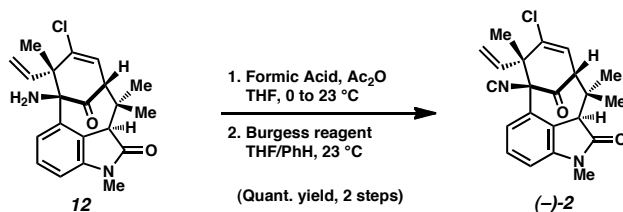

**(-)-*N*-Methylwelwitindolinone Isonitrile (2).** A 1-dram vial was charged with 96% formic acid (0.100 mL) and acetic anhydride (0.100 mL), and then stirred at 60 °C for 1 h. The reaction vessel was cooled to room temperature and 68  $\mu$ L of the 96% formic acid/acetic anhydride mixture was added to a solution of aminoketone **12** (7.5 mg, 0.0203 mmol, 1 equiv) in THF (450  $\mu$ L) at 0 °C. The reaction was stirred at 0 °C for 5 minutes, and then warmed to room temperature. After stirring for an additional 30 minutes, the reaction mixture was then transferred to a test tube containing EtOAc (1 mL) and a saturated solution of aqueous NaHCO<sub>3</sub> (1 mL). The resulting biphasic mixture was extracted with EtOAc (3 x 3 mL). The organic layers were combined, dried over MgSO<sub>4</sub>, and evaporated under reduced pressure to afford the crude product, which was used directly in the subsequent reaction.

To the crude residue was added THF (1 mL) and benzene (1 mL), followed by the addition of Burgess reagent (12 mg, 0.0406 mmol, 2 equiv). The vial was flushed with N<sub>2</sub> and allowed to stir at room temperature for 1 h. The reaction was then filtered through a plug of silica gel (EtOAc eluent, 20 mL). The filtrate was evaporated under reduced pressure, and the resulting residue was purified by prep TLC (1:1 hexanes:EtOAc) to afford (-)-**2** (7.8 mg, quant. yield) as an amorphous solid. (-)-*N*-Methylwelwitindolinone C isonitrile (**2**). Spectral data for synthetic **2** was consistent with literature reports<sup>4</sup>: *R*<sub>f</sub> 0.60 (1:1 hexanes:EtOAc); <sup>1</sup>H NMR (500 MHz, CDCl<sub>3</sub>):  $\delta$  7.33 (ddd, *J* = 8.5, 7.7, 0.9, 1H), 7.27 (dd, *J* = 8.5, 0.9, 1H), 6.81 (dd, *J* = 7.7, 0.9, 1H), 6.18 (d, *J* = 4.4, 1H), 5.37–5.30 (m, 3H), 3.73 (s, 1H), 3.23 (d, *J* = 4.4, 1H), 3.18 (s, 3H), 1.68 (s, 3H), 1.53 (s, 3H), 0.79 (s, 3H); <sup>13</sup>C NMR (125 MHz, CDCl<sub>3</sub>):  $\delta$  193.4, 173.9, 163.5, 144.5, 138.3, 136.2, 128.7, 127.7, 124.6, 123.3, 122.8, 118.3, 108.8, 81.9, 61.6, 55.6, 53.2, 40.7, 26.4, 25.6, 22.6, 21.3; IR (film): 2969, 2141, 1735, 1711, 1609, 1587, 1460, 1341 cm<sup>-1</sup>; HRMS-ESI (*m/z*) [M + Na]<sup>+</sup> calcd for C<sub>22</sub>H<sub>21</sub>N<sub>2</sub>O<sub>2</sub>ClNa, 403.1189; found 403.1178; [ $\alpha$ ]<sub>D</sub><sup>24.2</sup> -90.4° (*c* = 0.25, CH<sub>2</sub>Cl<sub>2</sub>).<sup>5</sup>

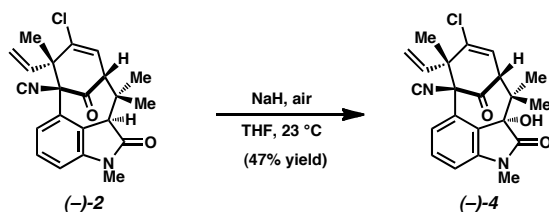

**(-)-3-Hydroxy-*N*-Methylwelwitindolinone C Isonitrile (4).** To a solution of (-)-**2** (7.8 mg, 0.0205 mmol, 1.0 equiv) in THF (1.1 mL) was added NaH (60% dispersion in mineral oil, 4.0 mg, 0.103 mmol, 5 equiv) in one portion. The vial was sealed under ambient atmospheric

conditions and allowed to stir at room temperature. After 2.5 h, the reaction was filtered through a plug of silica gel (EtOAc eluent, 20 mL). The filtrate was evaporated under reduced pressure and the resulting residue was purified by prep TLC (1:1 hexanes:EtOAc) to afford (–)-**2** (3.8 mg, 47% yield) as an amorphous solid. (–)-3-Hydroxy-*N*-methylwelwitindolinone C isonitrile (**4**). Spectral data for synthetic **4** was consistent with literature reports<sup>4</sup>:  $R_f$  0.46 (1:1 hexanes:EtOAc);  $^1\text{H NMR}$  (500 MHz,  $\text{CD}_2\text{Cl}_2$ ):  $\delta$  7.44 (dd,  $J = 8.2, 7.6$ , 1H), 7.33 (dd,  $J = 8.2, 0.9$ , 1H), 6.89 (dd,  $J = 7.6, 0.9$ , 1H), 6.40 (d,  $J = 4.6$ , 1H), 5.50 (dd,  $J = 17.2, 10.4$ , 1H), 5.40 (dd,  $J = 17.2, 0.8$  1H), 5.37 (dd,  $J = 10.4, 0.8$  1H), 3.18 (d,  $J = 4.6$ , 1H), 3.15 (s, 3H), 1.71 (s, 3H), 1.56 (s, 3H), 0.81 (s, 3H);  $^{13}\text{C NMR}$  (125 MHz,  $\text{C}_6\text{D}_6$ ):  $\delta$  192.6, 173.2, 166.5, 145.1, 137.4, 132.8, 130.3, 128.8, 126.4, 126.00, 125.98, 117.8, 109.2, 82.3, 80.2, 60.6, 55.4, 42.3, 25.6, 22.6, 22.0, 20.8; IR (film): 3395, 2973, 2922, 2142, 1723, 1610, 1587, 1459  $\text{cm}^{-1}$ ; HRMS-ESI ( $m/z$ )  $[\text{M} + \text{Na}]^+$  calcd for  $\text{C}_{22}\text{H}_{21}\text{N}_2\text{O}_3\text{ClNa}$ , 419.1138; found 419.1137;  $[\alpha]_{\text{D}}^{23.1} -90.0^\circ$  ( $c = 0.4$ ,  $\text{CH}_2\text{Cl}_2$ ).<sup>5</sup>

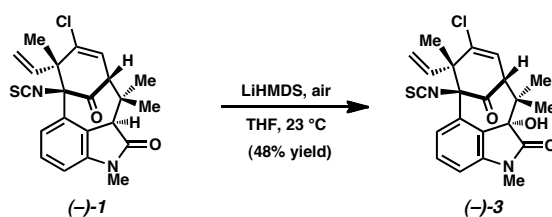

**(–)-3-Hydroxy-*N*-Methylwelwitindolinone C Isothiocyanate (3).** A 1-dram vial was charged with (–)-**1** (2.4 mg, 0.0058 mmol, 1.0 equiv) and then sealed under ambient atmospheric conditions. THF (300  $\mu\text{L}$ ) was then added, followed by the dropwise addition of 100  $\mu\text{L}$  of an 11 mg/mL solution of LiHMDS in THF. The reaction was stirred at room temperature for 6 h, and then another 50  $\mu\text{L}$  of the LiHMDS solution was added. After an additional 90 minutes, another 50  $\mu\text{L}$  of the LiHMDS solution was added and the reaction was stirred for an additional 14 h. The reaction was then filtered through a plug of silica gel (EtOAc eluent, 20 mL). The filtrate was evaporated under reduced pressure and the resulting residue was purified by prep TLC (1:1 hexanes:EtOAc) to afford (–)-**3** (1.2 mg, 48% yield) as an amorphous solid. (–)-3-hydroxy-*N*-methylwelwitindolinone C isothiocyanate (**3**)<sup>6</sup>:  $R_f$  0.46 (1:1 hexanes:EtOAc);  $^1\text{H NMR}$  (500 MHz,  $\text{CD}_2\text{Cl}_2$ ):  $\delta$  7.41 (dd,  $J = 8.4, 7.6$ , 1H), 7.25 (dd,  $J = 8.4, 0.9$ , 1H), 6.87 (dd,  $J = 7.6, 0.9$ , 1H), 6.40 (d,  $J = 4.5$ , 1H), 5.48 (dd,  $J = 17.5, 10.2$ , 1H), 5.33–5.29 (m, 2H), 3.21 (d,  $J = 4.5$ , 1H), 3.14 (s, 3H), 1.71 (s, 3H), 1.50 (s, 3H), 0.81 (s, 3H);  $^{13}\text{C NMR}$  (125 MHz,  $\text{CD}_2\text{Cl}_2$ ):  $\delta$  196.3, 173.7, 145.5, 140.7, 138.0, 133.8, 130.7, 130.6, 126.2, 126.1, 125.9, 117.9, 109.7, 84.5, 80.6, 61.1, 57.1, 42.9, 26.6, 22.9, 21.7, 21.2; IR (film): 3399, 2966, 2929, 2044, 1721, 1610, 1585, 1457  $\text{cm}^{-1}$ ; HRMS-ESI ( $m/z$ )  $[\text{M} + \text{Na}]^+$  calcd for  $\text{C}_{22}\text{H}_{21}\text{N}_2\text{O}_3\text{SClNa}$ , 451.0859; found 451.0860;  $[\alpha]_{\text{D}}^{25.2} -206.0^\circ$  ( $c = 1.00$ ,  $\text{CH}_2\text{Cl}_2$ ).<sup>5</sup>

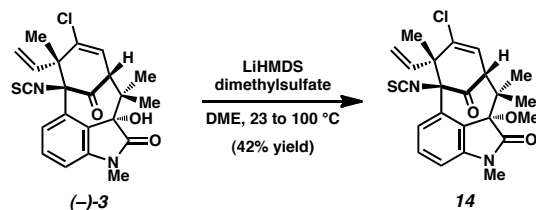

**Methyl Ether 14.** To a stirred solution of (–)-**3** (2.3 mg, 0.0054 mmol, 1.0 equiv) in DME (200  $\mu\text{L}$ ) was added 100  $\mu\text{L}$  of a 10 mg/mL solution of LiHMDS in DME. The reaction was stirred at room temperature for 1 h. Dimethylsulfate (10.2  $\mu\text{L}$ , 0.107 mmol, 20 equiv) was added and the reaction was heated to 100  $^\circ\text{C}$ . After 24 h, the reaction was cooled to room temperature and filtered through a plug of silica gel (EtOAc eluent, 20 mL). The filtrate was evaporated under reduced pressure and the resulting residue was purified by prep TLC (2:1:1 hexanes: $\text{CH}_2\text{Cl}_2$ : $\text{Et}_2\text{O}$ ) to afford **14** (1.0 mg, 42% yield) as an amorphous solid. Methyl Ether **14**:  $R_f$  0.58 (1:1 hexanes:EtOAc);  $^1\text{H NMR}$  (500 MHz,  $\text{CDCl}_3$ ):  $\delta$  7.41 (dd,  $J = 8.5, 7.9$ , 1H), 7.32 (dd,  $J = 8.5, 0.9$ , 1H), 6.82 (dd,  $J = 7.9, 0.9$ , 1H), 6.31 (d,  $J = 4.4$ , 1H), 5.46 (dd,  $J = 17.5, 10.1$ , 1H), 5.34 (d,  $J = 17.5$ , 1H), 5.34 (d,  $J = 10.1$ , 1H), 3.19 (s, 3H), 3.16 (d,  $J = 4.4$ , 1H), 1.70 (s, 3H), 1.49 (s, 3H), 0.81 (s, 3H);  $^{13}\text{C NMR}$  (125 MHz,  $\text{CDCl}_3$ ):  $\delta$  196.3, 172.0, 145.7, 140.7, 137.9, 132.3, 131.1, 130.7, 126.7, 126.1, 122.1, 117.7, 108.6, 85.2, 84.4, 61.1, 56.6, 51.3, 43.7, 26.1, 22.9, 21.62, 21.55; IR (film): 2916, 2050, 1725, 1607, 1583, 1455  $\text{cm}^{-1}$ ; HRMS-ESI ( $m/z$ )  $[\text{M} + \text{Na}]^+$  calcd for  $\text{C}_{23}\text{H}_{23}\text{N}_2\text{O}_3\text{SClNa}$ , 465.1016; found 465.1028;  $[\alpha]_{\text{D}}^{25.2} -118.7^\circ$  ( $c = 0.15$ ,  $\text{CH}_2\text{Cl}_2$ ).



**Computational Data.****Computed NMR chemical shift data****Table SI–1.** Comparison of Experimental and Computed NMR Chemical Shifts for Structure 4.

| <sup>13</sup> C NMR Chemical Shifts (ppm) |                         |                                |                                 | <sup>1</sup> H NMR Chemical Shifts (ppm) |                         |                                |                                 |
|-------------------------------------------|-------------------------|--------------------------------|---------------------------------|------------------------------------------|-------------------------|--------------------------------|---------------------------------|
| Nucleus # <sup>a</sup>                    | Expt. <sup>b</sup>      | Computed <sup>c</sup> Original | Computed <sup>c</sup> C3 epimer | Nucleus # <sup>a</sup>                   | Expt. <sup>b</sup>      | Computed <sup>c</sup> Original | Computed <sup>c</sup> C3 epimer |
| <i>N</i> CH <sub>3</sub>                  | 26.60                   | 24.75                          | 24.68                           | <i>N</i> CH <sub>3</sub>                 | 3.15                    | 3.02                           | 3.00                            |
| 2                                         | 173.60                  | 171.48                         | 172.62                          | OH                                       | 2.65                    | 2.20                           | 1.96                            |
| 3                                         | 80.60                   | 80.47                          | 80.08                           | 5                                        | 7.33                    | 7.20                           | 7.37                            |
| 4                                         | 128.40                  | 129.46                         | 132.98                          | 6                                        | 7.44                    | 7.39                           | 7.36                            |
| 5                                         | 126.20                  | 124.05                         | 123.51                          | 7                                        | 6.89                    | 6.82                           | 6.78                            |
| 6                                         | 130.80                  | 128.65                         | 128.49                          | 14                                       | 6.40                    | 6.40                           | 5.83                            |
| 7                                         | 110.00                  | 108.52                         | 108.75                          | 15                                       | 3.18                    | 3.22                           | 3.09                            |
| 8                                         | 145.50                  | 144.64                         | 143.77                          | 17                                       | 1.71                    | 1.66                           | 0.94                            |
| 9                                         | 126.40                  | 126.15                         | 127.18                          | 18                                       | 0.81                    | 0.77                           | 1.60                            |
| 10                                        | 193.60                  | 196.02                         | 198.73                          | 19                                       | 1.55                    | 1.55                           | 1.36                            |
| 11                                        | 82.00                   | 82.13                          | 77.56                           | 20                                       | 5.49                    | 5.48                           | 6.25                            |
| 12                                        | 55.50                   | 60.92                          | 60.84                           | 21 <i>E</i>                              | 5.34                    | 5.36                           | 5.65                            |
| 13                                        | 133.30                  | 140.06                         | 142.36                          | 21 <i>Z</i>                              | 5.40                    | 5.40                           | 5.58                            |
| 14                                        | 126.00                  | 128.32                         | 127.63                          |                                          |                         |                                |                                 |
| 15                                        | 61.00                   | 61.60                          | 59.56                           |                                          |                         |                                |                                 |
| 16                                        | 42.80                   | 48.39                          | 47.55                           |                                          |                         |                                |                                 |
| 17                                        | 22.80                   | 19.42                          | 21.41                           |                                          |                         |                                |                                 |
| 18                                        | 21.20                   | 21.49                          | 21.51                           |                                          |                         |                                |                                 |
| 19                                        | 22.10                   | 20.56                          | 20.48                           |                                          |                         |                                |                                 |
| 20                                        | 137.10                  | 139.50                         | 140.61                          |                                          |                         |                                |                                 |
| 21                                        | 118.40                  | 118.25                         | 120.00                          |                                          |                         |                                |                                 |
| 23                                        | 164.30                  | 168.17                         | 166.42                          |                                          |                         |                                |                                 |
|                                           | <b>CMAD<sup>d</sup></b> | <b>2.13</b>                    | <b>2.69</b>                     |                                          | <b>CMAD<sup>d</sup></b> | <b>0.08</b>                    | <b>0.36</b>                     |

<sup>a</sup>See page S11). <sup>b</sup>Data taken from isolation report; see reference 4. <sup>c</sup>Conformationally averaged values – see page S11). Largest outliers are indicated in red. Note that higher than average errors are expected for the carbon atom bearing a chlorine atom (C13) – due to heavy-atom effects, and for the hydroxyl proton – due to concentration-dependent hydrogen bonding.<sup>7</sup> <sup>d</sup>CMAD = corrected mean absolute deviation and is computed as  $\frac{1}{n} \sum_i |\delta_{comp} - \delta_{exp}|$  where  $\delta_{comp}$  refers to the scaled computed chemical shifts.

Note: For the C3 epimer structure, a modest improvement in the match to experimental data is found if the C17 and C18 methyl protons are switched in their experimental assignments

(CMAD = 0.26 ppm). This amount of improvement is not sufficient to change our overall conclusion.

**Table SI-2.** Comparison of Experimental and Computed NMR Chemical Shifts for Structure 3.

| <sup>13</sup> C NMR Chemical Shifts (ppm) |                         |                                   |                                    | <sup>1</sup> H NMR Chemical Shifts (ppm) |                         |                                   |                                    |
|-------------------------------------------|-------------------------|-----------------------------------|------------------------------------|------------------------------------------|-------------------------|-----------------------------------|------------------------------------|
| Nucleus # <sup>a</sup>                    | Expt. <sup>b</sup>      | Computed <sup>c</sup><br>Original | Computed <sup>c</sup><br>C3 epimer | Nucleus # <sup>a</sup>                   | Expt. <sup>b</sup>      | Computed <sup>c</sup><br>Original | Computed <sup>c</sup><br>C3 epimer |
| N CH <sub>3</sub>                         | 26.60                   | 24.89                             | 24.57                              | N CH <sub>3</sub>                        | 3.14                    | <b>3.02</b>                       | 3.01                               |
| 2                                         | 173.70                  | 172.44                            | 173.12                             | OH                                       | <i>not obsv.</i>        |                                   |                                    |
| 3                                         | 80.60                   | 80.37                             | 79.50                              | 5                                        | 7.25                    | <b>7.14</b>                       | 7.38                               |
| 4                                         | 130.60                  | 132.41                            | 132.88                             | 6                                        | 7.41                    | <b>7.30</b>                       | 7.26                               |
| 5                                         | 126.20                  | 124.24                            | 123.93                             | 7                                        | 6.87                    | 6.83                              | 6.73                               |
| 6                                         | 130.70                  | 128.78                            | 127.83                             | 14                                       | 6.40                    | 6.34                              | <b>5.87</b>                        |
| 7                                         | 109.70                  | 108.20                            | 108.22                             | 15                                       | 3.21                    | 3.20                              | 3.29                               |
| 8                                         | 145.50                  | 144.63                            | 144.49                             | 17                                       | 1.71                    | 1.62                              | <b>0.96</b>                        |
| 9                                         | 125.90                  | 125.36                            | 126.44                             | 18                                       | 0.81                    | 0.79                              | <b>1.61</b>                        |
| 10                                        | 196.30                  | 198.52                            | <b>201.21</b>                      | 19                                       | 1.50                    | 1.49                              | 1.38                               |
| 11                                        | 84.50                   | 86.70                             | 82.20                              | 20                                       | 5.48                    | 5.42                              | <b>6.30</b>                        |
| 12                                        | 57.10                   | 61.87                             | 60.36                              | 21 E                                     | 5.33–5.29               | 5.25                              | 5.56                               |
| 13                                        | 133.80                  | <b>140.56</b>                     | <b>143.45</b>                      | 21 Z                                     | 5.33–5.29               | 5.30                              | 5.42                               |
| 14                                        | 126.10                  | 126.98                            | 127.83                             |                                          |                         |                                   |                                    |
| 15                                        | 61.10                   | 60.63                             | 59.72                              |                                          |                         |                                   |                                    |
| 16                                        | 42.90                   | <b>48.15</b>                      | <b>47.78</b>                       |                                          |                         |                                   |                                    |
| 17                                        | 22.90                   | 19.33                             | 21.88                              |                                          |                         |                                   |                                    |
| 18                                        | 21.70                   | 21.38                             | 21.69                              |                                          |                         |                                   |                                    |
| 19                                        | 21.70                   | 19.95                             | 20.29                              |                                          |                         |                                   |                                    |
| 20                                        | 138.00                  | 141.57                            | 142.17                             |                                          |                         |                                   |                                    |
| 21                                        | 117.90                  | 116.31                            | 118.28                             |                                          |                         |                                   |                                    |
| 23                                        | 140.60                  | 144.85                            | <b>146.31</b>                      |                                          |                         |                                   |                                    |
|                                           | <b>CMAD<sup>d</sup></b> | <b>2.25</b>                       | <b>2.50</b>                        |                                          | <b>CMAD<sup>d</sup></b> | <b>0.06</b>                       | <b>0.33</b>                        |

<sup>a</sup> See page S11). <sup>b</sup> Data obtained from Prof Philip Williams (University of Hawaii); see ref 6.

<sup>c</sup>Lowest energy conformation – see page S11). Largest outliers are indicated in red. Note that higher than average errors are expected for the carbon atom bearing a chlorine atom (C13) – due to heavy-atom effects, and for the hydroxyl proton – due to concentration-dependent hydrogen bonding.<sup>7</sup> <sup>d</sup>CMAD = corrected mean absolute deviation and is computed as  $\frac{1}{n} \sum_{i=1}^n |\delta_{comp} - \delta_{exp}|$  where  $\delta_{comp}$

refers to the scaled computed chemical shifts. Where the experimental value is a range, the mean value is used.

Atom #'s used in Tables SI-1 & SI-2, taken from reference 4.

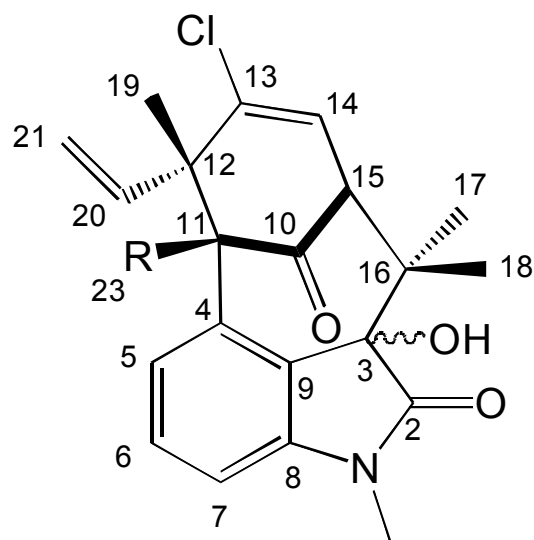

## Methods

### General

Calculations (geometry optimization, frequency, and NMR chemical shift) were performed on C3-hydroxyl-N-methylwelwitindolinone C isonitrile (structure **4**) and its C3 epimer, as well as C3-hydroxyl-N-methylwelwitindolinone C isothiocyanate (structure **3**) and its C3 epimer.

Calculations were performed with GAUSSIAN09.<sup>8</sup> Geometries were optimized in the gas-phase using the B3LYP/6-31+G(d,p)<sup>9</sup> level of theory. Frequency calculations (at 298.15 K) at the same level of theory were used to confirm the nature of all stationary points as minima and also provided values for computed free energies. NMR single point calculations (GIAO)<sup>10</sup> were performed on these geometries at the mPW1PW91/6-311+G(d,p)<sup>11</sup> level of theory in an implicit chloroform solvent continuum (SMD<sup>12</sup> method).

### Conformational Analysis

For structure **4** and its C3 epimer, nine candidate conformers (three conformations of the vinyl group and three conformations of the hydroxyl group) for each epimer were subjected to geometry optimization. This resulted in four unique conformers for structure **4** and six unique conformers of its C3 epimer. For both epimers, Boltzmann-weighted averaging of the computed chemical shifts based on the relative computed free energies at 298.15 K of each conformer was performed, using the equation below to determine relative populations.

$$\frac{P_i}{P_j} = e^{\frac{-(E_i - E_j)}{RT}}$$

$P_i$  = population of conformer  $i$  relative to lowest energy conformer  $j$   
 $E_i, E_j$  = computed free energies (in J/mol)  
 $R$  = molar gas constant (8.314510 J mol<sup>-1</sup> K<sup>-1</sup>)  
 $T$  = 298.15 K

The relative populations were then converted to Boltzmann-weighting factors by means of a set of linear equations.

Although only one conformer of the ring system seemed to be likely, both epimers of structure **4** were subjected to a conformational search (in Spartan'10).<sup>13</sup> As expected, only a single conformation of the ring system was found in each case.

For the isothiocyanate structure **3**, the major contributing (lowest energy) conformer of isonitrile structure **4** was converted into the corresponding isothiocyanate, and subjected to geometry optimization, followed by frequency and NMR chemical shift calculations (for both epimers).

#### Empirical scaling of computed NMR chemical shifts

Computed chemical shifts are commonly scaled empirically in order to remove systematic error that results from a variety of sources. The scaling factors themselves are generally determined by comparison of computed NMR data with known experimental chemical shifts for large databases of molecules. These factors (slope and intercept from a best fit line) are specific for each level of theory used computationally. We have generated numerous such scaling factors for <sup>1</sup>H and <sup>13</sup>C chemical shifts utilizing a database originally compiled by Rablen and co-workers and have made them available on our web site at <http://cheshirenmr.info>.

One of our preferred methods for obtaining high quality computed chemical shifts at reasonable costs is to use mPW1PW91/6-311+G(2d,p) NMR calculations (with the SMD chloroform continuum model) on B3LYP/6-31+G(d,p) geometries. After scaling, this method produces average errors (CMAD's) of 0.11-0.15 ppm for <sup>1</sup>H and 1.8-2.5 ppm for <sup>13</sup>C on diverse sets of small organic molecules. Details and numerous references on linear regression methods applied to computed chemical shifts can be found in our review paper.<sup>7</sup>

The specific scaling factors used in this study are given below and are applied to the computed NMR isotropic shielding constants by way of the equation shown.

|           |                |                 |                                  |                                                                                                                                        |
|-----------|----------------|-----------------|----------------------------------|----------------------------------------------------------------------------------------------------------------------------------------|
|           | <sup>1</sup> H | <sup>13</sup> C | $\delta = \frac{b - \sigma}{-m}$ | $\delta$ = computed chemical shift relative to TMS<br>$\sigma$ = computed isotropic shielding constant<br>$m$ = slope, $b$ = intercept |
| Slope     | -1.0936        | -1.0533         |                                  |                                                                                                                                        |
| Intercept | 31.8018        | 186.5242        |                                  |                                                                                                                                        |

#### DP4 Probability Analysis

For further support of our assignment to the C3(*S*) diastereomer for isonitrile structure **4**, we utilized the DP4 probability analysis of Smith and Goodman.<sup>14</sup> When both possible epimers were compared to the experimental data, the analysis suggested a 67.5% probability of C3(*S*) being correct based on the <sup>13</sup>C data, a 100% probability based on the <sup>1</sup>H data, and a 100% probability based on both sets of data.

---

## Energies, coordinates, and NMR isotropic shielding constants

### Structure 4, conformer 1

Sum of electronic and thermal free energies = -1645.99519 H

| Center<br>Number | Atomic<br>Number | Coordinates (Angstroms) |           |           |
|------------------|------------------|-------------------------|-----------|-----------|
|                  |                  | X                       | Y         | Z         |
| 1                | 7                | -3.380511               | 0.751109  | -0.617354 |
| 2                | 6                | -3.108729               | -0.579788 | -0.477610 |
| 3                | 6                | -1.576958               | -0.739243 | -0.229973 |
| 4                | 6                | 0.100593                | 1.342374  | 0.224316  |
| 5                | 6                | 0.166355                | 2.747156  | 0.083118  |
| 6                | 6                | -0.926998               | 3.509133  | -0.308650 |
| 7                | 6                | -2.164939               | 2.908981  | -0.547955 |
| 8                | 6                | -2.224961               | 1.528726  | -0.433403 |
| 9                | 6                | -1.115549               | 0.717867  | -0.099250 |
| 10               | 6                | 0.911574                | -0.488942 | 1.794213  |
| 11               | 6                | 1.361546                | 0.651230  | 0.832091  |
| 12               | 6                | 2.441035                | 0.080430  | -0.232322 |
| 13               | 6                | 1.991257                | -1.302366 | -0.688458 |
| 14               | 6                | 1.114541                | -2.103441 | -0.085843 |
| 15               | 6                | 0.340831                | -1.738622 | 1.154370  |
| 16               | 6                | -1.226129               | -1.694004 | 0.949197  |
| 17               | 6                | -1.694972               | -3.141817 | 0.675179  |
| 18               | 6                | -1.918249               | -1.203489 | 2.239070  |
| 19               | 6                | 3.813867                | -0.103077 | 0.460532  |
| 20               | 6                | 2.502368                | 1.034876  | -1.415368 |
| 21               | 6                | 3.497088                | 1.873522  | -1.710270 |
| 22               | 7                | 2.033204                | 1.616907  | 1.637432  |
| 23               | 6                | 2.586836                | 2.357422  | 2.363512  |
| 24               | 6                | -4.681175               | 1.269742  | -0.999762 |
| 25               | 8                | -3.902935               | -1.495419 | -0.652588 |
| 26               | 8                | -1.090993               | -1.225047 | -1.496027 |
| 27               | 8                | 1.040237                | -0.387499 | 2.994192  |
| 28               | 17               | 2.810643                | -1.908346 | -2.135113 |
| 29               | 1                | 1.094865                | 3.254364  | 0.304017  |
| 30               | 1                | -0.819288               | 4.585337  | -0.400957 |
| 31               | 1                | -3.037307               | 3.497044  | -0.810138 |
| 32               | 1                | 0.936332                | -3.087914 | -0.503238 |
| 33               | 1                | 0.500607                | -2.520825 | 1.907413  |
| 34               | 1                | -2.776929               | -3.181623 | 0.543748  |
| 35               | 1                | -1.426114               | -3.773261 | 1.528812  |
| 36               | 1                | -1.231478               | -3.576643 | -0.214547 |
| 37               | 1                | -1.578758               | -1.786674 | 3.099890  |
| 38               | 1                | -3.002030               | -1.330487 | 2.154846  |
| 39               | 1                | -1.711653               | -0.151953 | 2.456298  |
| 40               | 1                | 4.498705                | -0.599373 | -0.230537 |
| 41               | 1                | 3.714525                | -0.727653 | 1.352535  |
| 42               | 1                | 4.252712                | 0.847527  | 0.762572  |
| 43               | 1                | 1.626966                | 1.010046  | -2.060573 |
| 44               | 1                | 3.429437                | 2.518753  | -2.581112 |
| 45               | 1                | 4.403556                | 1.951460  | -1.119072 |
| 46               | 1                | -5.361472               | 0.421841  | -1.084425 |
| 47               | 1                | -4.622074               | 1.785227  | -1.964582 |
| 48               | 1                | -5.056951               | 1.965669  | -0.242570 |
| 49               | 1                | -1.689279               | -1.931402 | -1.787016 |

|    |   |             |          |    |   |             |         |
|----|---|-------------|----------|----|---|-------------|---------|
| 2  | C | Isotropic = | 5.3824   | 29 | H | Isotropic = | 23.9179 |
| 3  | C | Isotropic = | 101.9705 | 30 | H | Isotropic = | 23.7070 |
| 4  | C | Isotropic = | 49.7929  | 31 | H | Isotropic = | 24.3199 |
| 5  | C | Isotropic = | 55.7165  | 32 | H | Isotropic = | 24.8577 |
| 6  | C | Isotropic = | 51.0288  | 33 | H | Isotropic = | 28.2880 |
| 7  | C | Isotropic = | 72.1794  | 34 | H | Isotropic = | 29.1701 |
| 8  | C | Isotropic = | 34.1558  | 35 | H | Isotropic = | 30.8685 |
| 9  | C | Isotropic = | 53.9450  | 36 | H | Isotropic = | 30.0279 |
| 10 | C | Isotropic = | -20.0573 | 37 | H | Isotropic = | 30.5775 |
| 11 | C | Isotropic = | 100.0258 | 38 | H | Isotropic = | 30.8627 |
| 12 | C | Isotropic = | 122.5598 | 39 | H | Isotropic = | 31.4457 |
| 13 | C | Isotropic = | 39.6653  | 40 | H | Isotropic = | 30.0039 |
| 14 | C | Isotropic = | 51.8523  | 41 | H | Isotropic = | 30.6930 |
| 15 | C | Isotropic = | 121.7132 | 42 | H | Isotropic = | 29.6167 |
| 16 | C | Isotropic = | 135.6107 | 43 | H | Isotropic = | 25.8003 |
| 17 | C | Isotropic = | 166.2994 | 44 | H | Isotropic = | 25.9664 |
| 18 | C | Isotropic = | 164.0007 | 45 | H | Isotropic = | 25.8850 |
| 19 | C | Isotropic = | 165.0069 | 46 | H | Isotropic = | 27.5588 |
| 20 | C | Isotropic = | 39.3145  | 47 | H | Isotropic = | 28.9537 |
| 21 | C | Isotropic = | 62.5941  | 48 | H | Isotropic = | 28.9597 |
| 23 | C | Isotropic = | 9.4942   | 49 | H | Isotropic = | 29.4283 |
| 24 | C | Isotropic = | 160.3779 |    |   |             |         |

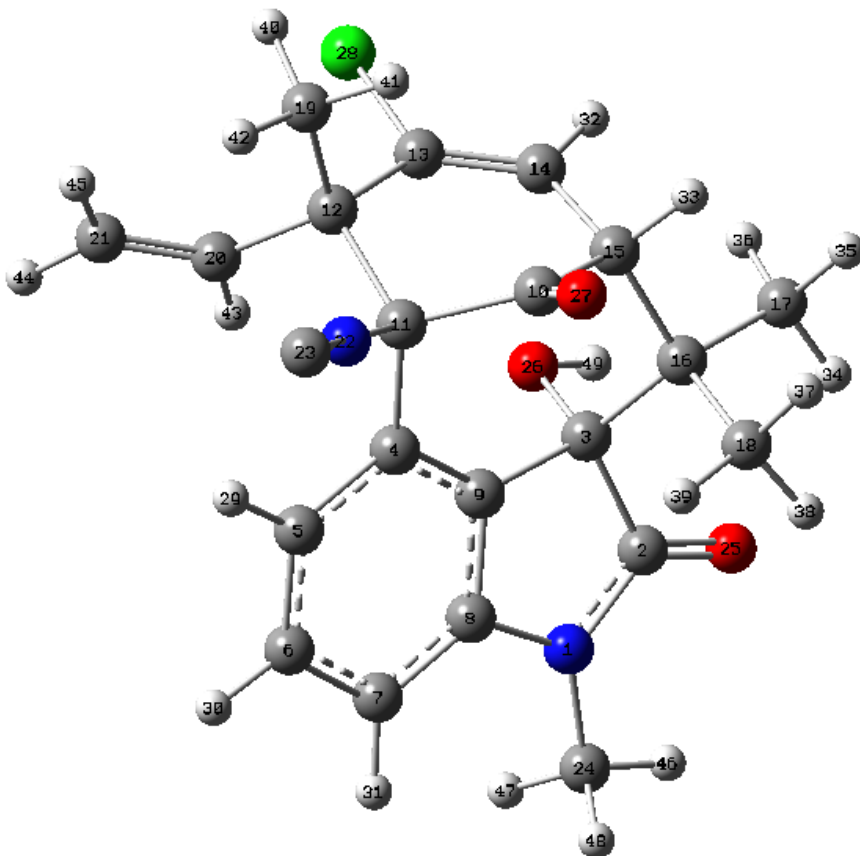

Structure 4, conformer 2

Sum of electronic and thermal free energies = -1645.992378 H

| Center<br>Number | Atomic<br>Number | Coordinates (Angstroms) |           |           |
|------------------|------------------|-------------------------|-----------|-----------|
|                  |                  | X                       | Y         | Z         |
| 1                | 7                | -3.389910               | 0.411641  | -0.584188 |
| 2                | 6                | -2.965521               | -0.872239 | -0.398840 |
| 3                | 6                | -1.427194               | -0.846062 | -0.141642 |
| 4                | 6                | 0.012876                | 1.426251  | 0.172806  |
| 5                | 6                | -0.088399               | 2.823398  | -0.011922 |
| 6                | 6                | -1.268385               | 3.441804  | -0.404375 |
| 7                | 6                | -2.431329               | 2.695800  | -0.605917 |
| 8                | 6                | -2.329062               | 1.322773  | -0.445527 |
| 9                | 6                | -1.129801               | 0.657371  | -0.101630 |
| 10               | 6                | 1.030557                | -0.187507 | 1.832779  |
| 11               | 6                | 1.356655                | 0.894958  | 0.758969  |
| 12               | 6                | 2.436090                | 0.330558  | -0.322514 |
| 13               | 6                | 2.169786                | -1.147259 | -0.573941 |
| 14               | 6                | 1.396904                | -1.962253 | 0.142545  |
| 15               | 6                | 0.567402                | -1.538793 | 1.325806  |
| 16               | 6                | -0.991904               | -1.665159 | 1.111119  |
| 17               | 6                | -1.311230               | -3.169442 | 0.949863  |
| 18               | 6                | -1.738553               | -1.147243 | 2.358981  |
| 19               | 6                | 3.869594                | 0.421973  | 0.274214  |
| 20               | 6                | 2.371154                | 1.204721  | -1.566937 |
| 21               | 6                | 1.672684                | 0.966313  | -2.677686 |
| 22               | 7                | 1.980856                | 1.972917  | 1.454311  |
| 23               | 6                | 2.499432                | 2.806413  | 2.101395  |
| 24               | 6                | -4.742986               | 0.763434  | -0.974618 |
| 25               | 8                | -3.645808               | -1.880969 | -0.539796 |
| 26               | 8                | -0.879667               | -1.372703 | -1.364425 |
| 27               | 8                | 1.169300                | 0.037695  | 3.014619  |
| 28               | 17               | 3.113201                | -1.882915 | -1.883336 |
| 29               | 1                | 0.776650                | 3.444181  | 0.173272  |
| 30               | 1                | -1.286911               | 4.519781  | -0.530763 |
| 31               | 1                | -3.369095               | 3.170462  | -0.871934 |
| 32               | 1                | 1.366618                | -3.013474 | -0.122288 |
| 33               | 1                | 0.786676                | -2.220689 | 2.157072  |
| 34               | 1                | -2.383033               | -3.328798 | 0.826617  |
| 35               | 1                | -0.982069               | -3.705397 | 1.846601  |
| 36               | 1                | -0.803240               | -3.618029 | 0.092046  |
| 37               | 1                | -1.359121               | -1.638557 | 3.259701  |
| 38               | 1                | -2.806525               | -1.374337 | 2.280869  |
| 39               | 1                | -1.625833               | -0.069313 | 2.502672  |
| 40               | 1                | 4.565784                | -0.076892 | -0.403155 |
| 41               | 1                | 3.926828                | -0.068257 | 1.250262  |
| 42               | 1                | 4.188723                | 1.458815  | 0.387579  |
| 43               | 1                | 2.951041                | 2.123283  | -1.491520 |
| 44               | 1                | 1.689639                | 1.674541  | -3.500899 |
| 45               | 1                | 1.066322                | 0.074939  | -2.805571 |
| 46               | 1                | -5.322154               | -0.159042 | -1.024872 |
| 47               | 1                | -4.746801               | 1.248298  | -1.956963 |
| 48               | 1                | -5.193416               | 1.438110  | -0.239220 |
| 49               | 1                | -1.404343               | -2.153019 | -1.604425 |

|    |   |             |          |    |   |             |         |
|----|---|-------------|----------|----|---|-------------|---------|
| 2  | C | Isotropic = | 4.9313   | 29 | H | Isotropic = | 23.8898 |
| 3  | C | Isotropic = | 101.8846 | 30 | H | Isotropic = | 23.7819 |
| 4  | C | Isotropic = | 47.7504  | 31 | H | Isotropic = | 24.3539 |
| 5  | C | Isotropic = | 56.1850  | 32 | H | Isotropic = | 24.8360 |
| 6  | C | Isotropic = | 50.5833  | 33 | H | Isotropic = | 28.3687 |
| 7  | C | Isotropic = | 72.3931  | 34 | H | Isotropic = | 29.2774 |
| 8  | C | Isotropic = | 34.0780  | 35 | H | Isotropic = | 30.8967 |
| 9  | C | Isotropic = | 54.5485  | 36 | H | Isotropic = | 29.9107 |
| 10 | C | Isotropic = | -19.4205 | 37 | H | Isotropic = | 30.6386 |
| 11 | C | Isotropic = | 98.4760  | 38 | H | Isotropic = | 30.9444 |
| 12 | C | Isotropic = | 120.3660 | 39 | H | Isotropic = | 31.4424 |
| 13 | C | Isotropic = | 39.7763  | 40 | H | Isotropic = | 29.7032 |
| 14 | C | Isotropic = | 48.9210  | 41 | H | Isotropic = | 30.6575 |
| 15 | C | Isotropic = | 121.5678 | 42 | H | Isotropic = | 29.9034 |
| 16 | C | Isotropic = | 135.6714 | 43 | H | Isotropic = | 25.7159 |
| 17 | C | Isotropic = | 166.5375 | 44 | H | Isotropic = | 26.1295 |
| 18 | C | Isotropic = | 164.1755 | 45 | H | Isotropic = | 26.4239 |
| 19 | C | Isotropic = | 158.0736 | 46 | H | Isotropic = | 27.5589 |
| 20 | C | Isotropic = | 40.9847  | 47 | H | Isotropic = | 28.9945 |
| 21 | C | Isotropic = | 54.8881  | 48 | H | Isotropic = | 28.9520 |
| 23 | C | Isotropic = | 7.6178   | 49 | H | Isotropic = | 29.4036 |
| 24 | C | Isotropic = | 160.4337 |    |   |             |         |

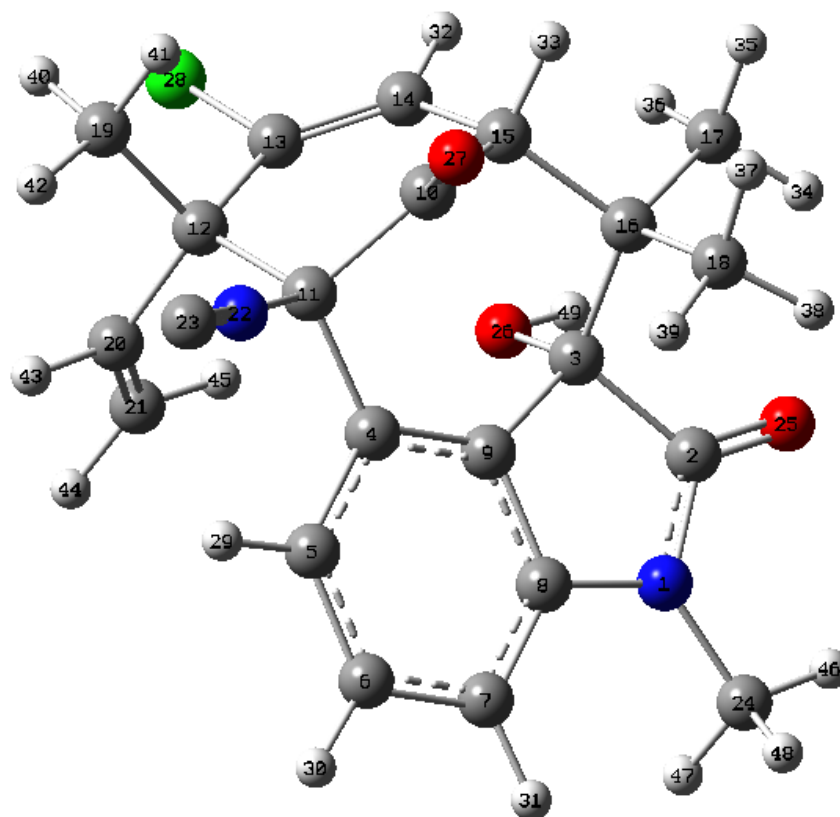



Structure 4, conformer 3

Sum of electronic and thermal free energies = -1645.993819 H

| Center<br>Number | Atomic<br>Number | Coordinates (Angstroms) |           |           |
|------------------|------------------|-------------------------|-----------|-----------|
|                  |                  | X                       | Y         | Z         |
| 1                | 7                | -3.368932               | 0.825648  | -0.629677 |
| 2                | 6                | -3.157544               | -0.516396 | -0.430269 |
| 3                | 6                | -1.615809               | -0.722439 | -0.255060 |
| 4                | 6                | 0.110041                | 1.315147  | 0.269538  |
| 5                | 6                | 0.216937                | 2.720030  | 0.145044  |
| 6                | 6                | -0.846054               | 3.511664  | -0.269219 |
| 7                | 6                | -2.092278               | 2.944669  | -0.546407 |
| 8                | 6                | -2.196843               | 1.566140  | -0.436883 |
| 9                | 6                | -1.116419               | 0.723442  | -0.077750 |
| 10               | 6                | 0.893998                | -0.610775 | 1.760484  |
| 11               | 6                | 1.349943                | 0.587841  | 0.876648  |
| 12               | 6                | 2.449760                | 0.069134  | -0.194197 |
| 13               | 6                | 1.964466                | -1.253081 | -0.780820 |
| 14               | 6                | 1.076899                | -2.090895 | -0.235152 |
| 15               | 6                | 0.318438                | -1.813115 | 1.038195  |
| 16               | 6                | -1.251673               | -1.752414 | 0.852265  |
| 17               | 6                | -1.730562               | -3.171703 | 0.473467  |
| 18               | 6                | -1.918724               | -1.347152 | 2.184506  |
| 19               | 6                | 3.784465                | -0.234372 | 0.531732  |
| 20               | 6                | 2.603352                | 1.114144  | -1.288207 |
| 21               | 6                | 3.654511                | 1.911392  | -1.484484 |
| 22               | 7                | 2.010776                | 1.505779  | 1.742841  |
| 23               | 6                | 2.556233                | 2.206743  | 2.513309  |
| 24               | 6                | -4.666021               | 1.390904  | -0.949739 |
| 25               | 8                | -4.017924               | -1.377950 | -0.464930 |
| 26               | 8                | -1.278846               | -1.185915 | -1.578005 |
| 27               | 8                | 1.025223                | -0.591597 | 2.963826  |
| 28               | 17               | 2.785009                | -1.759528 | -2.265224 |
| 29               | 1                | 1.151272                | 3.201081  | 0.398496  |
| 30               | 1                | -0.709502               | 4.585596  | -0.349512 |
| 31               | 1                | -2.941161               | 3.557803  | -0.827679 |
| 32               | 1                | 0.888501                | -3.043511 | -0.719605 |
| 33               | 1                | 0.487428                | -2.651677 | 1.725197  |
| 34               | 1                | -2.816004               | -3.189593 | 0.373942  |
| 35               | 1                | -1.437135               | -3.875270 | 1.260605  |
| 36               | 1                | -1.313172               | -3.510827 | -0.476299 |
| 37               | 1                | -1.562267               | -1.983655 | 2.999523  |
| 38               | 1                | -3.002208               | -1.472190 | 2.108315  |
| 39               | 1                | -1.710453               | -0.310705 | 2.465781  |
| 40               | 1                | 4.481365                | -0.696440 | -0.171052 |
| 41               | 1                | 3.625627                | -0.926805 | 1.362777  |
| 42               | 1                | 4.242145                | 0.670104  | 0.931887  |
| 43               | 1                | 1.750170                | 1.203559  | -1.957080 |
| 44               | 1                | 3.652028                | 2.630787  | -2.297749 |
| 45               | 1                | 4.544204                | 1.883991  | -0.864411 |
| 46               | 1                | -5.377827               | 0.566846  | -1.006027 |
| 47               | 1                | -4.632832               | 1.908513  | -1.914460 |
| 48               | 1                | -4.985630               | 2.095613  | -0.174126 |
| 49               | 1                | -0.322909               | -1.100994 | -1.701002 |

|    |   |             |          |    |   |             |         |
|----|---|-------------|----------|----|---|-------------|---------|
| 2  | C | Isotropic = | 8.2332   | 29 | H | Isotropic = | 23.9698 |
| 3  | C | Isotropic = | 100.9151 | 30 | H | Isotropic = | 23.7605 |
| 4  | C | Isotropic = | 52.2624  | 31 | H | Isotropic = | 24.4222 |
| 5  | C | Isotropic = | 56.4224  | 32 | H | Isotropic = | 24.6004 |
| 6  | C | Isotropic = | 51.0441  | 33 | H | Isotropic = | 28.2420 |
| 7  | C | Isotropic = | 72.3600  | 34 | H | Isotropic = | 28.9353 |
| 8  | C | Isotropic = | 34.2295  | 35 | H | Isotropic = | 30.8612 |
| 9  | C | Isotropic = | 52.2202  | 36 | H | Isotropic = | 29.6794 |
| 10 | C | Isotropic = | -19.6241 | 37 | H | Isotropic = | 30.4989 |
| 11 | C | Isotropic = | 100.3225 | 38 | H | Isotropic = | 30.7159 |
| 12 | C | Isotropic = | 122.0071 | 39 | H | Isotropic = | 31.5247 |
| 13 | C | Isotropic = | 36.0314  | 40 | H | Isotropic = | 30.1151 |
| 14 | C | Isotropic = | 50.0042  | 41 | H | Isotropic = | 30.6694 |
| 15 | C | Isotropic = | 121.3573 | 42 | H | Isotropic = | 29.6456 |
| 16 | C | Isotropic = | 135.2910 | 43 | H | Isotropic = | 25.8986 |
| 17 | C | Isotropic = | 165.0367 | 44 | H | Isotropic = | 25.7683 |
| 18 | C | Isotropic = | 163.3592 | 45 | H | Isotropic = | 25.7723 |
| 19 | C | Isotropic = | 166.0095 | 46 | H | Isotropic = | 27.5553 |
| 20 | C | Isotropic = | 40.3261  | 47 | H | Isotropic = | 28.9550 |
| 21 | C | Isotropic = | 61.0648  | 48 | H | Isotropic = | 29.0701 |
| 23 | C | Isotropic = | 9.3674   | 49 | H | Isotropic = | 29.2466 |
| 24 | C | Isotropic = | 160.7578 |    |   |             |         |

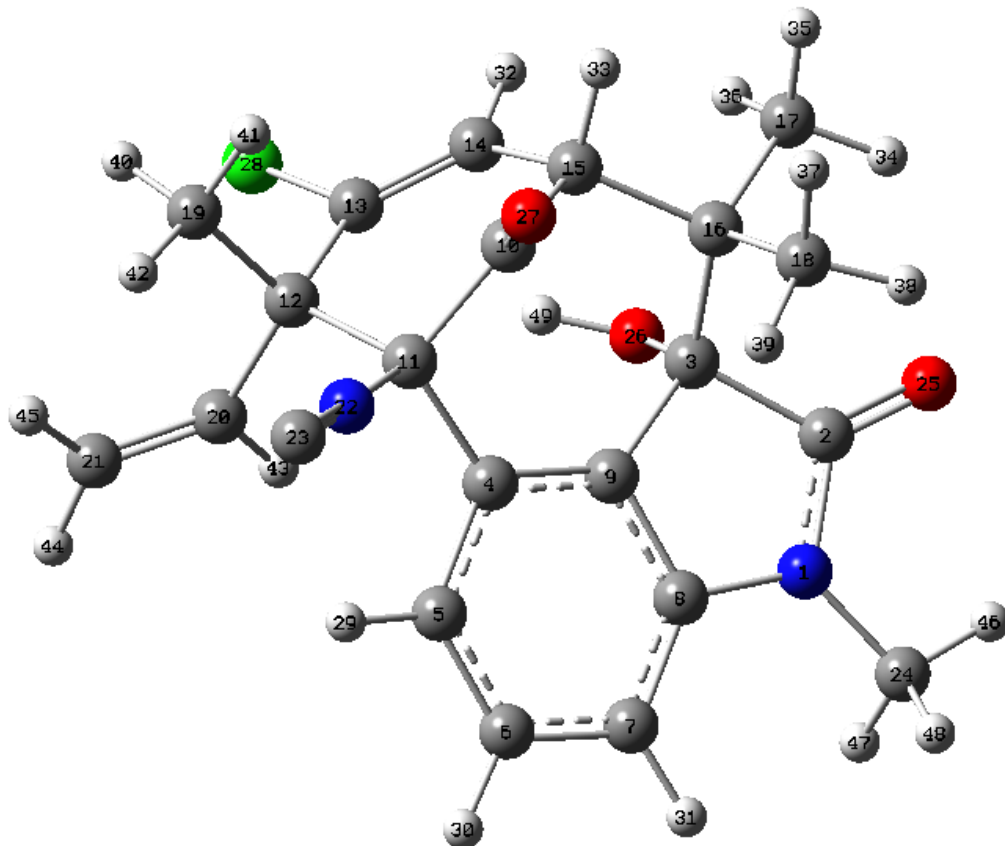

Structure 4, conformer 4

Sum of electronic and thermal free energies = -1645.990807 H

| Center<br>Number | Atomic<br>Number | Coordinates (Angstroms) |           |           |
|------------------|------------------|-------------------------|-----------|-----------|
|                  |                  | X                       | Y         | Z         |
| 1                | 7                | -3.383740               | 0.566778  | -0.610315 |
| 2                | 6                | -3.053866               | -0.749632 | -0.404647 |
| 3                | 6                | -1.502026               | -0.816780 | -0.214802 |
| 4                | 6                | 0.041698                | 1.369611  | 0.272369  |
| 5                | 6                | 0.019676                | 2.777398  | 0.141515  |
| 6                | 6                | -1.111888               | 3.469606  | -0.267287 |
| 7                | 6                | -2.302822               | 2.791942  | -0.538165 |
| 8                | 6                | -2.281883               | 1.410361  | -0.422782 |
| 9                | 6                | -1.130076               | 0.669650  | -0.061469 |
| 10               | 6                | 0.985067                | -0.440706 | 1.799880  |
| 11               | 6                | 1.344407                | 0.756735  | 0.872524  |
| 12               | 6                | 2.471665                | 0.293020  | -0.205474 |
| 13               | 6                | 2.119896                | -1.097394 | -0.718871 |
| 14               | 6                | 1.302069                | -1.977261 | -0.128904 |
| 15               | 6                | 0.502608                | -1.706429 | 1.120501  |
| 16               | 6                | -1.064392               | -1.781722 | 0.924539  |
| 17               | 6                | -1.419350               | -3.245934 | 0.582480  |
| 18               | 6                | -1.770669               | -1.396033 | 2.241871  |
| 19               | 6                | 3.848229                | 0.151181  | 0.507979  |
| 20               | 6                | 2.589793                | 1.375056  | -1.266159 |
| 21               | 6                | 2.063455                | 1.389910  | -2.491065 |
| 22               | 7                | 1.949458                | 1.746286  | 1.702698  |
| 23               | 6                | 2.450688                | 2.501879  | 2.451465  |
| 24               | 6                | -4.725876               | 1.012629  | -0.932908 |
| 25               | 8                | -3.833050               | -1.685569 | -0.439157 |
| 26               | 8                | -1.108252               | -1.282675 | -1.518983 |
| 27               | 8                | 1.118726                | -0.370258 | 3.001027  |
| 28               | 17               | 3.064853                | -1.681170 | -2.100933 |
| 29               | 1                | 0.906429                | 3.344477  | 0.387287  |
| 30               | 1                | -1.072432               | 4.551192  | -0.351229 |
| 31               | 1                | -3.204506               | 3.324865  | -0.818126 |
| 32               | 1                | 1.228235                | -2.977031 | -0.544828 |
| 33               | 1                | 0.731191                | -2.503770 | 1.838738  |
| 34               | 1                | -2.499142               | -3.360044 | 0.484947  |
| 35               | 1                | -1.066253               | -3.902404 | 1.385728  |
| 36               | 1                | -0.973398               | -3.569377 | -0.359684 |
| 37               | 1                | -1.371713               | -1.981726 | 3.075163  |
| 38               | 1                | -2.840486               | -1.607855 | 2.163737  |
| 39               | 1                | -1.645868               | -0.339626 | 2.496583  |
| 40               | 1                | 4.568505                | -0.279372 | -0.191013 |
| 41               | 1                | 3.779438                | -0.504005 | 1.381016  |
| 42               | 1                | 4.225967                | 1.121416  | 0.832729  |
| 43               | 1                | 3.160923                | 2.240385  | -0.934546 |
| 44               | 1                | 2.211380                | 2.246374  | -3.141755 |
| 45               | 1                | 1.480996                | 0.570431  | -2.899529 |
| 46               | 1                | -5.360630               | 0.127838  | -0.989069 |
| 47               | 1                | -4.738278               | 1.530177  | -1.898183 |
| 48               | 1                | -5.108798               | 1.686745  | -0.158694 |
| 49               | 1                | -0.151893               | -1.164749 | -1.608721 |

|    |   |             |          |    |   |             |         |
|----|---|-------------|----------|----|---|-------------|---------|
| 2  | C | Isotropic = | 8.2386   | 29 | H | Isotropic = | 23.9665 |
| 3  | C | Isotropic = | 100.8098 | 30 | H | Isotropic = | 23.7824 |
| 4  | C | Isotropic = | 50.6591  | 31 | H | Isotropic = | 24.4111 |
| 5  | C | Isotropic = | 55.8937  | 32 | H | Isotropic = | 24.4481 |
| 6  | C | Isotropic = | 51.4584  | 33 | H | Isotropic = | 28.2770 |
| 7  | C | Isotropic = | 72.3683  | 34 | H | Isotropic = | 28.9619 |
| 8  | C | Isotropic = | 34.4162  | 35 | H | Isotropic = | 30.8492 |
| 9  | C | Isotropic = | 52.3402  | 36 | H | Isotropic = | 29.6213 |
| 10 | C | Isotropic = | -19.4601 | 37 | H | Isotropic = | 30.5030 |
| 11 | C | Isotropic = | 99.3093  | 38 | H | Isotropic = | 30.7587 |
| 12 | C | Isotropic = | 119.5882 | 39 | H | Isotropic = | 31.5047 |
| 13 | C | Isotropic = | 36.6404  | 40 | H | Isotropic = | 29.7433 |
| 14 | C | Isotropic = | 46.8267  | 41 | H | Isotropic = | 30.5658 |
| 15 | C | Isotropic = | 121.3607 | 42 | H | Isotropic = | 29.8611 |
| 16 | C | Isotropic = | 135.3283 | 43 | H | Isotropic = | 25.4891 |
| 17 | C | Isotropic = | 165.1747 | 44 | H | Isotropic = | 26.0009 |
| 18 | C | Isotropic = | 163.5269 | 45 | H | Isotropic = | 26.6548 |
| 19 | C | Isotropic = | 159.0525 | 46 | H | Isotropic = | 27.5470 |
| 20 | C | Isotropic = | 42.1685  | 47 | H | Isotropic = | 28.9975 |
| 21 | C | Isotropic = | 56.4925  | 48 | H | Isotropic = | 29.0701 |
| 23 | C | Isotropic = | 8.0406   | 49 | H | Isotropic = | 29.0085 |
| 24 | C | Isotropic = | 160.7613 |    |   |             |         |

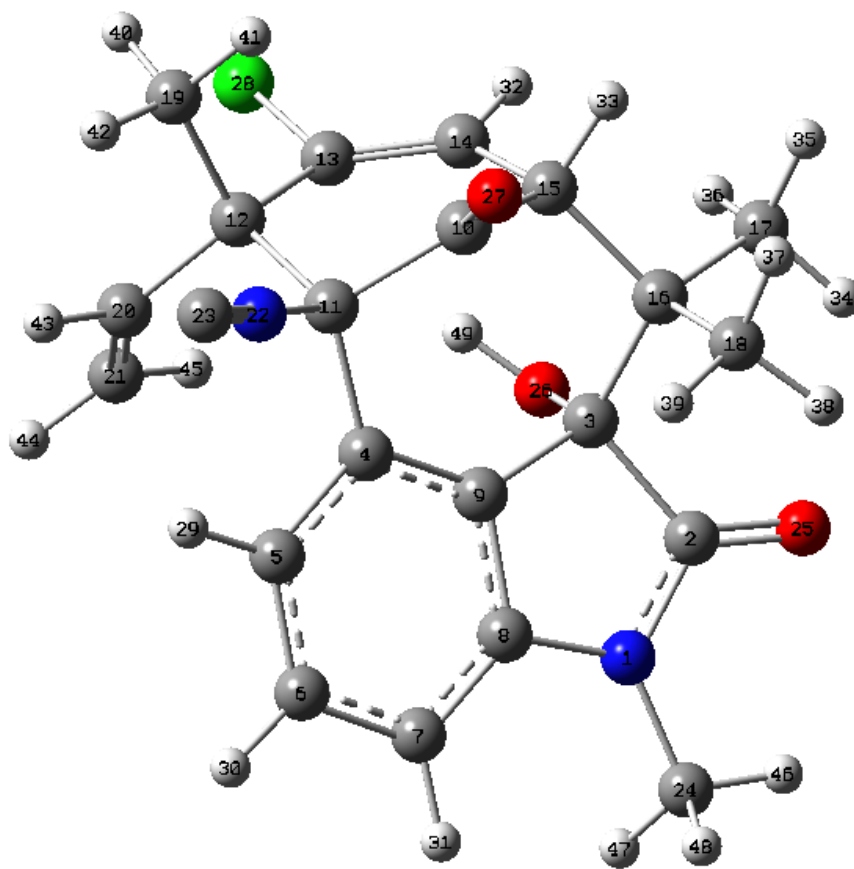

Structure 4, C3 epimer, conformer 1

Sum of electronic and thermal free energies = -1645.990153 H

| Center<br>Number | Atomic<br>Number | Coordinates (Angstroms) |           |           |
|------------------|------------------|-------------------------|-----------|-----------|
|                  |                  | X                       | Y         | Z         |
| 1                | 7                | -3.288099               | 1.175668  | -0.492135 |
| 2                | 6                | -3.342285               | -0.126122 | -0.051393 |
| 3                | 6                | -1.919172               | -0.517146 | 0.467896  |
| 4                | 6                | 0.216887                | 1.116132  | 0.417828  |
| 5                | 6                | 0.574596                | 2.469902  | 0.244971  |
| 6                | 6                | -0.328608               | 3.404260  | -0.250180 |
| 7                | 6                | -1.640543               | 3.038434  | -0.570087 |
| 8                | 6                | -2.007208               | 1.721176  | -0.330716 |
| 9                | 6                | -1.109312               | 0.751089  | 0.163076  |
| 10               | 6                | 0.677127                | -1.267257 | 1.184698  |
| 11               | 6                | 1.289584                | 0.140867  | 0.966776  |
| 12               | 6                | 2.575046                | -0.092689 | 0.000328  |
| 13               | 6                | 2.049458                | -0.793428 | -1.248061 |
| 14               | 6                | 0.990422                | -1.602758 | -1.280469 |
| 15               | 6                | 0.181495                | -1.977392 | -0.064002 |
| 16               | 6                | -1.406789               | -1.847788 | -0.199949 |
| 17               | 6                | -1.804230               | -1.873909 | -1.691333 |
| 18               | 6                | -2.052391               | -3.058982 | 0.505371  |
| 19               | 6                | 3.567136                | -1.054323 | 0.705381  |
| 20               | 6                | 3.251073                | 1.220955  | -0.359613 |
| 21               | 6                | 4.341876                | 1.730577  | 0.216459  |
| 22               | 7                | 1.754250                | 0.642592  | 2.213633  |
| 23               | 6                | 2.123883                | 1.053143  | 3.252223  |
| 24               | 6                | -4.450401               | 1.908166  | -0.958184 |
| 25               | 8                | -4.337098               | -0.828475 | -0.041046 |
| 26               | 8                | -2.162345               | -0.633914 | 1.873909  |
| 27               | 8                | 0.582003                | -1.758320 | 2.292595  |
| 28               | 17               | 3.012929                | -0.604441 | -2.717114 |
| 29               | 1                | 1.565825                | 2.796251  | 0.528119  |
| 30               | 1                | -0.012579               | 4.435246  | -0.376291 |
| 31               | 1                | -2.349097               | 3.766197  | -0.949937 |
| 32               | 1                | 0.745583                | -2.103865 | -2.209250 |
| 33               | 1                | 0.362853                | -3.043980 | 0.123176  |
| 34               | 1                | -1.454774               | -0.989199 | -2.233915 |
| 35               | 1                | -2.890367               | -1.935564 | -1.783427 |
| 36               | 1                | -1.388636               | -2.758513 | -2.183704 |
| 37               | 1                | -1.801792               | -3.972569 | -0.046034 |
| 38               | 1                | -3.138164               | -2.948786 | 0.529867  |
| 39               | 1                | -1.696158               | -3.173178 | 1.531216  |
| 40               | 1                | 4.421744                | -1.229297 | 0.047779  |
| 41               | 1                | 3.103579                | -2.019656 | 0.922715  |
| 42               | 1                | 3.929574                | -0.637874 | 1.646851  |
| 43               | 1                | 2.788680                | 1.770696  | -1.173443 |
| 44               | 1                | 4.746011                | 2.680106  | -0.121828 |
| 45               | 1                | 4.868284                | 1.245979  | 1.031658  |
| 46               | 1                | -4.286205               | 2.289523  | -1.971632 |
| 47               | 1                | -5.294088               | 1.217278  | -0.961382 |
| 48               | 1                | -4.673133               | 2.747444  | -0.289889 |
| 49               | 1                | -1.356329               | -0.880342 | 2.350000  |

|    |   |             |          |    |   |             |         |
|----|---|-------------|----------|----|---|-------------|---------|
| 2  | C | Isotropic = | 8.1779   | 29 | H | Isotropic = | 23.7702 |
| 3  | C | Isotropic = | 101.0505 | 30 | H | Isotropic = | 23.7763 |
| 4  | C | Isotropic = | 47.8541  | 31 | H | Isotropic = | 24.4329 |
| 5  | C | Isotropic = | 57.3462  | 32 | H | Isotropic = | 25.3772 |
| 6  | C | Isotropic = | 51.2848  | 33 | H | Isotropic = | 28.2214 |
| 7  | C | Isotropic = | 71.9486  | 34 | H | Isotropic = | 31.0741 |
| 8  | C | Isotropic = | 35.1191  | 35 | H | Isotropic = | 30.3962 |
| 9  | C | Isotropic = | 50.6689  | 36 | H | Isotropic = | 30.6682 |
| 10 | C | Isotropic = | -31.7935 | 37 | H | Isotropic = | 30.6696 |
| 11 | C | Isotropic = | 103.2573 | 38 | H | Isotropic = | 29.3534 |
| 12 | C | Isotropic = | 123.3461 | 39 | H | Isotropic = | 29.7256 |
| 13 | C | Isotropic = | 36.3752  | 40 | H | Isotropic = | 30.2138 |
| 14 | C | Isotropic = | 53.0628  | 41 | H | Isotropic = | 30.9754 |
| 15 | C | Isotropic = | 124.3429 | 42 | H | Isotropic = | 29.6424 |
| 16 | C | Isotropic = | 136.0421 | 43 | H | Isotropic = | 24.9394 |
| 17 | C | Isotropic = | 162.8294 | 44 | H | Isotropic = | 25.6098 |
| 18 | C | Isotropic = | 161.6207 | 45 | H | Isotropic = | 25.7081 |
| 19 | C | Isotropic = | 164.8084 | 46 | H | Isotropic = | 29.0151 |
| 20 | C | Isotropic = | 39.1842  | 47 | H | Isotropic = | 27.6030 |
| 21 | C | Isotropic = | 59.8987  | 48 | H | Isotropic = | 29.0021 |
| 23 | C | Isotropic = | 10.1194  | 49 | H | Isotropic = | 29.7586 |
| 24 | C | Isotropic = | 160.7944 |    |   |             |         |

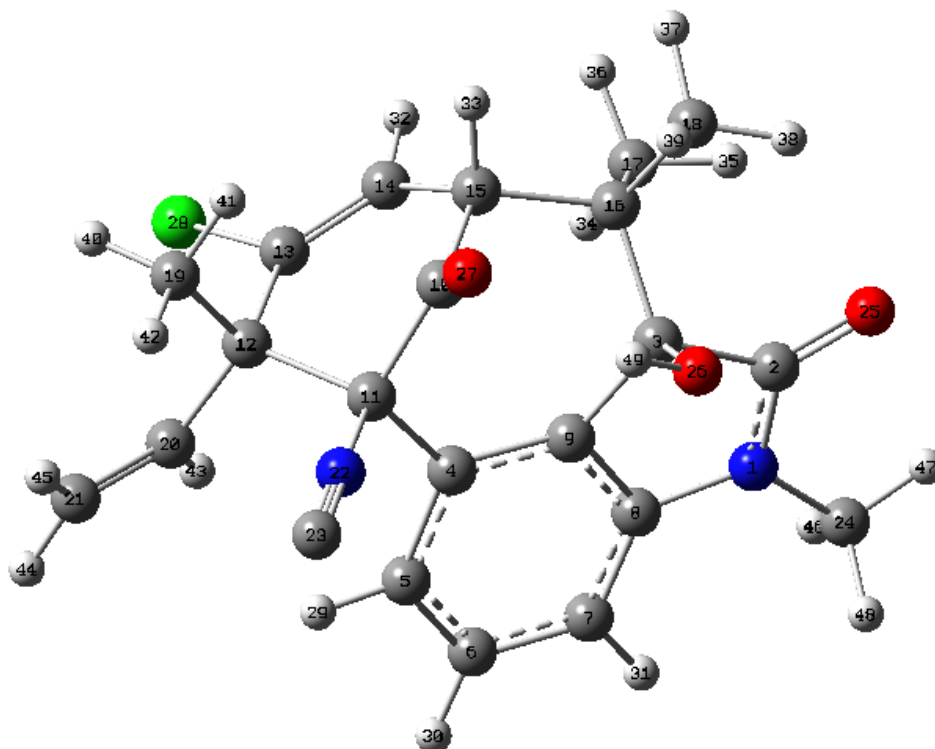

Structure 4, C3 epimer, conformer 2

Sum of electronic and thermal free energies = -1645.984941 H

| Center<br>Number | Atomic<br>Number | Coordinates (Angstroms) |           |           |
|------------------|------------------|-------------------------|-----------|-----------|
|                  |                  | X                       | Y         | Z         |
| 1                | 7                | -3.278393               | 1.117972  | -0.533461 |
| 2                | 6                | -3.310383               | -0.209469 | -0.178852 |
| 3                | 6                | -1.902906               | -0.587507 | 0.389296  |
| 4                | 6                | 0.185832                | 1.105916  | 0.535168  |
| 5                | 6                | 0.498441                | 2.480029  | 0.471956  |
| 6                | 6                | -0.414085               | 3.416622  | -0.001700 |
| 7                | 6                | -1.694216               | 3.031209  | -0.411083 |
| 8                | 6                | -2.023780               | 1.689516  | -0.276956 |
| 9                | 6                | -1.117140               | 0.717749  | 0.196082  |
| 10               | 6                | 0.678948                | -1.295351 | 1.201769  |
| 11               | 6                | 1.266480                | 0.132206  | 1.075058  |
| 12               | 6                | 2.607114                | -0.025916 | 0.162271  |
| 13               | 6                | 2.176542                | -0.689437 | -1.139566 |
| 14               | 6                | 1.130719                | -1.511176 | -1.253244 |
| 15               | 6                | 0.261511                | -1.951592 | -0.102602 |
| 16               | 6                | -1.317902               | -1.862164 | -0.319460 |
| 17               | 6                | -1.631250               | -1.813554 | -1.830465 |
| 18               | 6                | -1.963050               | -3.129295 | 0.280033  |
| 19               | 6                | 3.588562                | -1.007686 | 0.872083  |
| 20               | 6                | 3.341014                | 1.300907  | 0.055371  |
| 21               | 6                | 3.389177                | 2.161408  | -0.962656 |
| 22               | 7                | 1.668367                | 0.584181  | 2.365535  |
| 23               | 6                | 1.977950                | 0.945099  | 3.441586  |
| 24               | 6                | -4.440003               | 1.843416  | -1.011636 |
| 25               | 8                | -4.279727               | -0.942319 | -0.263731 |
| 26               | 8                | -2.211929               | -0.787911 | 1.773533  |
| 27               | 8                | 0.548325                | -1.842008 | 2.279464  |
| 28               | 17               | 3.272230                | -0.583978 | -2.525662 |
| 29               | 1                | 1.463443                | 2.821562  | 0.813100  |
| 30               | 1                | -0.129282               | 4.463551  | -0.041017 |
| 31               | 1                | -2.410581               | 3.759099  | -0.775830 |
| 32               | 1                | 0.969213                | -2.010491 | -2.201256 |
| 33               | 1                | 0.466678                | -3.020853 | 0.041535  |
| 34               | 1                | -1.277141               | -0.890238 | -2.301119 |
| 35               | 1                | -2.708330               | -1.897056 | -1.988036 |
| 36               | 1                | -1.163913               | -2.657356 | -2.347271 |
| 37               | 1                | -1.653516               | -4.002908 | -0.305300 |
| 38               | 1                | -3.051393               | -3.051544 | 0.248445  |
| 39               | 1                | -1.661113               | -3.290452 | 1.316941  |
| 40               | 1                | 4.477093                | -1.126810 | 0.246868  |
| 41               | 1                | 3.145988                | -1.995540 | 1.023409  |
| 42               | 1                | 3.899830                | -0.615425 | 1.842892  |
| 43               | 1                | 3.899484                | 1.542858  | 0.957834  |
| 44               | 1                | 3.981398                | 3.068289  | -0.877126 |
| 45               | 1                | 2.857633                | 2.015263  | -1.895536 |
| 46               | 1                | -4.242538               | 2.286829  | -1.993526 |
| 47               | 1                | -5.261236               | 1.130562  | -1.092827 |
| 48               | 1                | -4.718029               | 2.636531  | -0.308601 |
| 49               | 1                | -1.420214               | -1.020993 | 2.279312  |

|    |   |             |          |    |   |             |         |
|----|---|-------------|----------|----|---|-------------|---------|
| 2  | C | Isotropic = | 8.5407   | 29 | H | Isotropic = | 23.7140 |
| 3  | C | Isotropic = | 100.7337 | 30 | H | Isotropic = | 23.8762 |
| 4  | C | Isotropic = | 48.2975  | 31 | H | Isotropic = | 24.4155 |
| 5  | C | Isotropic = | 56.1226  | 32 | H | Isotropic = | 25.3406 |
| 6  | C | Isotropic = | 52.0942  | 33 | H | Isotropic = | 28.1967 |
| 7  | C | Isotropic = | 72.0936  | 34 | H | Isotropic = | 31.0889 |
| 8  | C | Isotropic = | 35.5088  | 35 | H | Isotropic = | 30.4055 |
| 9  | C | Isotropic = | 50.9200  | 36 | H | Isotropic = | 30.6679 |
| 10 | C | Isotropic = | -31.9216 | 37 | H | Isotropic = | 30.7191 |
| 11 | C | Isotropic = | 103.7739 | 38 | H | Isotropic = | 29.3263 |
| 12 | C | Isotropic = | 120.9632 | 39 | H | Isotropic = | 29.6950 |
| 13 | C | Isotropic = | 38.4030  | 40 | H | Isotropic = | 29.8207 |
| 14 | C | Isotropic = | 50.6647  | 41 | H | Isotropic = | 30.8758 |
| 15 | C | Isotropic = | 123.5190 | 42 | H | Isotropic = | 29.8531 |
| 16 | C | Isotropic = | 137.1848 | 43 | H | Isotropic = | 25.2441 |
| 17 | C | Isotropic = | 162.7858 | 44 | H | Isotropic = | 25.4090 |
| 18 | C | Isotropic = | 161.7333 | 45 | H | Isotropic = | 26.1240 |
| 19 | C | Isotropic = | 159.8194 | 46 | H | Isotropic = | 29.0313 |
| 20 | C | Isotropic = | 43.5803  | 47 | H | Isotropic = | 27.5970 |
| 21 | C | Isotropic = | 52.4288  | 48 | H | Isotropic = | 29.0234 |
| 23 | C | Isotropic = | 9.4675   | 49 | H | Isotropic = | 29.7756 |
| 24 | C | Isotropic = | 160.9283 |    |   |             |         |

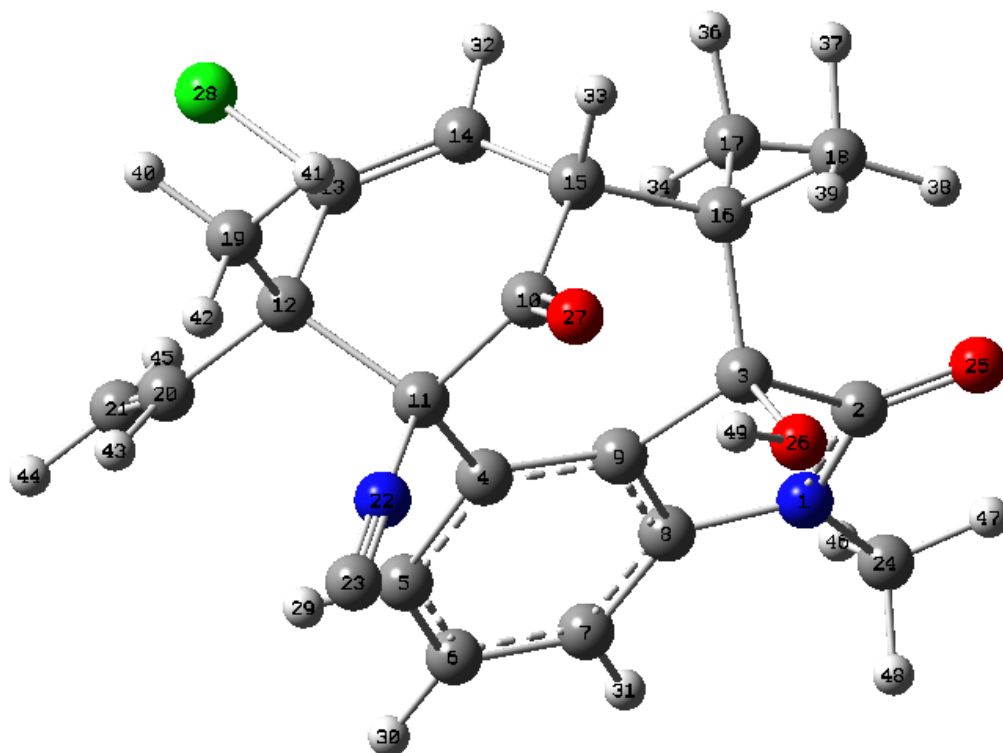



Structure 4, C3 epimer, conformer 3

Sum of electronic and thermal free energies = -1645.993218 H

| Center<br>Number | Atomic<br>Number | Coordinates (Angstroms) |           |           |
|------------------|------------------|-------------------------|-----------|-----------|
|                  |                  | X                       | Y         | Z         |
| 1                | 7                | -3.304913               | 1.158080  | -0.473247 |
| 2                | 6                | -3.343767               | -0.124220 | 0.012860  |
| 3                | 6                | -1.900808               | -0.526113 | 0.438143  |
| 4                | 6                | 0.202583                | 1.098414  | 0.441505  |
| 5                | 6                | 0.549857                | 2.458531  | 0.300853  |
| 6                | 6                | -0.349169               | 3.394542  | -0.201661 |
| 7                | 6                | -1.654658               | 3.030875  | -0.552499 |
| 8                | 6                | -2.016782               | 1.709150  | -0.335573 |
| 9                | 6                | -1.114512               | 0.741754  | 0.146499  |
| 10               | 6                | 0.712752                | -1.342329 | 1.145440  |
| 11               | 6                | 1.262646                | 0.108362  | 0.982553  |
| 12               | 6                | 2.560517                | -0.074405 | 0.005008  |
| 13               | 6                | 2.038092                | -0.733226 | -1.267192 |
| 14               | 6                | 0.977493                | -1.539015 | -1.335178 |
| 15               | 6                | 0.165346                | -1.970739 | -0.137086 |
| 16               | 6                | -1.410666               | -1.832481 | -0.278582 |
| 17               | 6                | -1.827944               | -1.804664 | -1.763284 |
| 18               | 6                | -2.052035               | -3.069296 | 0.389982  |
| 19               | 6                | 3.578225                | -1.040036 | 0.666839  |
| 20               | 6                | 3.217110                | 1.261431  | -0.309193 |
| 21               | 6                | 4.289669                | 1.774829  | 0.297376  |
| 22               | 7                | 1.719682                | 0.579075  | 2.241375  |
| 23               | 6                | 2.085755                | 0.958664  | 3.292619  |
| 24               | 6                | -4.488163               | 1.905444  | -0.858646 |
| 25               | 8                | -4.346060               | -0.811932 | 0.151027  |
| 26               | 8                | -1.913560               | -0.658144 | 1.862321  |
| 27               | 8                | 0.831333                | -1.960728 | 2.176980  |
| 28               | 17               | 3.004922                | -0.490953 | -2.728440 |
| 29               | 1                | 1.529805                | 2.790146  | 0.614743  |
| 30               | 1                | -0.036243               | 4.429139  | -0.304160 |
| 31               | 1                | -2.360881               | 3.764169  | -0.926083 |
| 32               | 1                | 0.737318                | -2.002744 | -2.285010 |
| 33               | 1                | 0.350153                | -3.045699 | -0.012173 |
| 34               | 1                | -1.474030               | -0.906708 | -2.279741 |
| 35               | 1                | -2.916945               | -1.848538 | -1.846404 |
| 36               | 1                | -1.430496               | -2.676692 | -2.291910 |
| 37               | 1                | -1.805258               | -3.964359 | -0.191192 |
| 38               | 1                | -3.141320               | -2.978058 | 0.419119  |
| 39               | 1                | -1.671232               | -3.222910 | 1.403675  |
| 40               | 1                | 4.445008                | -1.142476 | 0.009787  |
| 41               | 1                | 3.150534                | -2.030982 | 0.826388  |
| 42               | 1                | 3.914830                | -0.662151 | 1.634015  |
| 43               | 1                | 2.757918                | 1.825543  | -1.114875 |
| 44               | 1                | 4.680780                | 2.740848  | -0.008234 |
| 45               | 1                | 4.811897                | 1.277404  | 1.107423  |
| 46               | 1                | -4.380090               | 2.298264  | -1.874694 |
| 47               | 1                | -5.337383               | 1.222389  | -0.820208 |
| 48               | 1                | -4.662884               | 2.738110  | -0.167863 |
| 49               | 1                | -2.611489               | -1.284980 | 2.106659  |

|    |   |             |          |    |   |             |         |
|----|---|-------------|----------|----|---|-------------|---------|
| 2  | C | Isotropic = | 4.5082   | 29 | H | Isotropic = | 23.7408 |
| 3  | C | Isotropic = | 102.2206 | 30 | H | Isotropic = | 23.7433 |
| 4  | C | Isotropic = | 46.4347  | 31 | H | Isotropic = | 24.3823 |
| 5  | C | Isotropic = | 56.3911  | 32 | H | Isotropic = | 25.4292 |
| 6  | C | Isotropic = | 51.1940  | 33 | H | Isotropic = | 28.4365 |
| 7  | C | Isotropic = | 71.9627  | 34 | H | Isotropic = | 31.0058 |
| 8  | C | Isotropic = | 35.0494  | 35 | H | Isotropic = | 30.6109 |
| 9  | C | Isotropic = | 52.6692  | 36 | H | Isotropic = | 30.6921 |
| 10 | C | Isotropic = | -22.5454 | 37 | H | Isotropic = | 30.6963 |
| 11 | C | Isotropic = | 104.8751 | 38 | H | Isotropic = | 29.5775 |
| 12 | C | Isotropic = | 122.4370 | 39 | H | Isotropic = | 29.9092 |
| 13 | C | Isotropic = | 36.5446  | 40 | H | Isotropic = | 30.3197 |
| 14 | C | Isotropic = | 52.0920  | 41 | H | Isotropic = | 30.9179 |
| 15 | C | Isotropic = | 123.7915 | 42 | H | Isotropic = | 29.7019 |
| 16 | C | Isotropic = | 136.4725 | 43 | H | Isotropic = | 24.9580 |
| 17 | C | Isotropic = | 164.0214 | 44 | H | Isotropic = | 25.6285 |
| 18 | C | Isotropic = | 164.0273 | 45 | H | Isotropic = | 25.6935 |
| 19 | C | Isotropic = | 164.9704 | 46 | H | Isotropic = | 28.9284 |
| 20 | C | Isotropic = | 38.3761  | 47 | H | Isotropic = | 27.6248 |
| 21 | C | Isotropic = | 60.1109  | 48 | H | Isotropic = | 29.0147 |
| 23 | C | Isotropic = | 11.2619  | 49 | H | Isotropic = | 29.5616 |
| 24 | C | Isotropic = | 160.4922 |    |   |             |         |

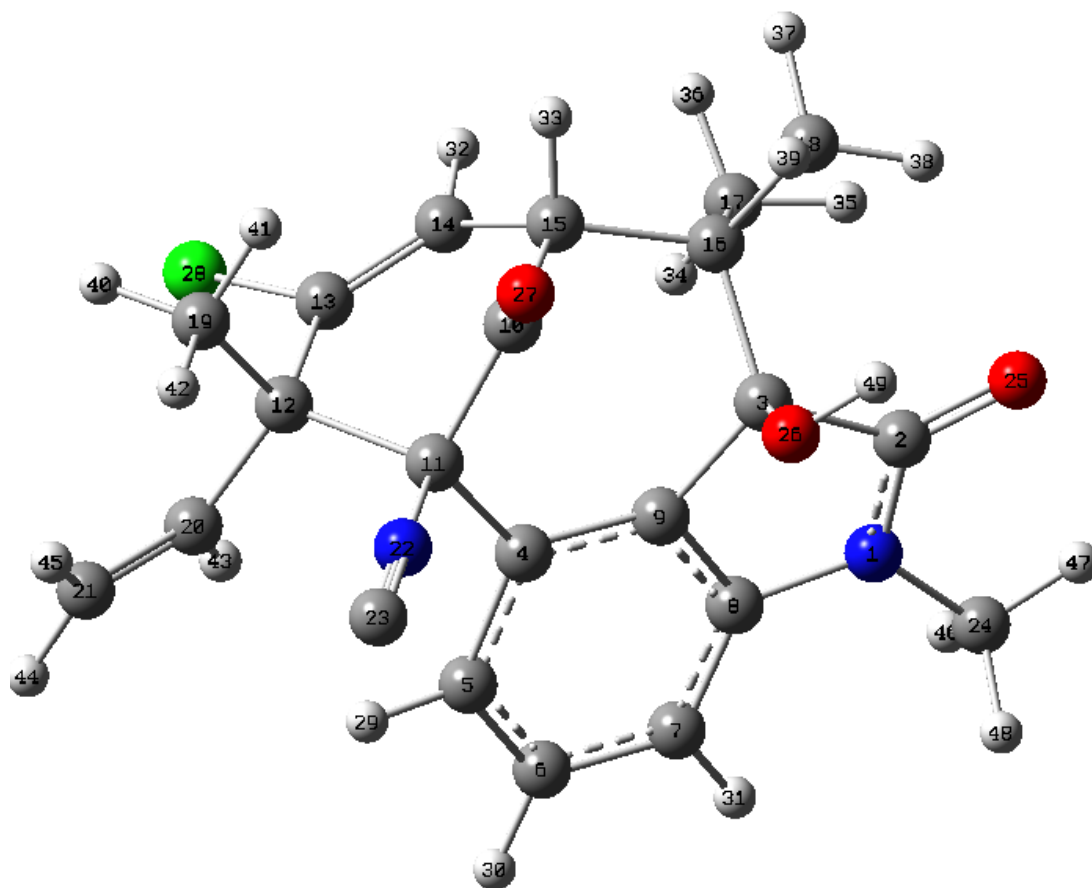

Structure 4, C3 epimer, conformer 4

Sum of electronic and thermal free energies = -1645.987825 H

| Center<br>Number | Atomic<br>Number | Coordinates (Angstroms) |           |           |
|------------------|------------------|-------------------------|-----------|-----------|
|                  |                  | X                       | Y         | Z         |
| 1                | 7                | -3.296992               | 1.098062  | -0.519742 |
| 2                | 6                | -3.317437               | -0.210481 | -0.111600 |
| 3                | 6                | -1.884018               | -0.593435 | 0.359311  |
| 4                | 6                | 0.167951                | 1.087122  | 0.557247  |
| 5                | 6                | 0.468669                | 2.464755  | 0.525766  |
| 6                | 6                | -0.438472               | 3.403086  | 0.042077  |
| 7                | 6                | -1.709896               | 3.021859  | -0.399926 |
| 8                | 6                | -2.034115               | 1.677458  | -0.287498 |
| 9                | 6                | -1.123219               | 0.709965  | 0.176459  |
| 10               | 6                | 0.714456                | -1.368430 | 1.162040  |
| 11               | 6                | 1.234122                | 0.098595  | 1.090693  |
| 12               | 6                | 2.587794                | -0.006527 | 0.172366  |
| 13               | 6                | 2.166070                | -0.632158 | -1.150719 |
| 14               | 6                | 1.121171                | -1.449679 | -1.302106 |
| 15               | 6                | 0.245808                | -1.942975 | -0.174963 |
| 16               | 6                | -1.320668               | -1.840181 | -0.402156 |
| 17               | 6                | -1.650628               | -1.730027 | -1.905135 |
| 18               | 6                | -1.963149               | -3.132190 | 0.150963  |
| 19               | 6                | 3.600765                | -0.983010 | 0.844450  |
| 20               | 6                | 3.295345                | 1.337588  | 0.109250  |
| 21               | 6                | 3.360863                | 2.218882  | -0.890052 |
| 22               | 7                | 1.625594                | 0.519045  | 2.392415  |
| 23               | 6                | 1.929422                | 0.848788  | 3.479734  |
| 24               | 6                | -4.483964               | 1.831598  | -0.919345 |
| 25               | 8                | -4.301992               | -0.935598 | -0.063345 |
| 26               | 8                | -1.957268               | -0.806376 | 1.772259  |
| 27               | 8                | 0.808081                | -2.034886 | 2.165788  |
| 28               | 17               | 3.272247                | -0.483221 | -2.526924 |
| 29               | 1                | 1.419198                | 2.810462  | 0.901120  |
| 30               | 1                | -0.157996               | 4.451844  | 0.025838  |
| 31               | 1                | -2.423665               | 3.754808  | -0.759696 |
| 32               | 1                | 0.969832                | -1.914653 | -2.269756 |
| 33               | 1                | 0.455063                | -3.017670 | -0.091631 |
| 34               | 1                | -1.288388               | -0.794356 | -2.343013 |
| 35               | 1                | -2.731464               | -1.790928 | -2.056824 |
| 36               | 1                | -1.202105               | -2.559204 | -2.460985 |
| 37               | 1                | -1.657828               | -3.982723 | -0.468039 |
| 38               | 1                | -3.054361               | -3.070632 | 0.122706  |
| 39               | 1                | -1.636281               | -3.339575 | 1.173934  |
| 40               | 1                | 4.498186                | -1.032525 | 0.222334  |
| 41               | 1                | 3.198684                | -1.992566 | 0.946629  |
| 42               | 1                | 3.887046                | -0.623190 | 1.835406  |
| 43               | 1                | 3.824146                | 1.570334  | 1.031876  |
| 44               | 1                | 3.936363                | 3.132432  | -0.768057 |
| 45               | 1                | 2.859783                | 2.084733  | -1.841219 |
| 46               | 1                | -4.339782               | 2.288596  | -1.903624 |
| 47               | 1                | -5.310886               | 1.122067  | -0.964380 |
| 48               | 1                | -4.720173               | 2.615082  | -0.190315 |
| 49               | 1                | -2.645567               | -1.466065 | 1.947961  |

|    |   |             |          |    |   |             |         |
|----|---|-------------|----------|----|---|-------------|---------|
| 2  | C | Isotropic = | 4.8033   | 29 | H | Isotropic = | 23.7027 |
| 3  | C | Isotropic = | 101.9481 | 30 | H | Isotropic = | 23.8476 |
| 4  | C | Isotropic = | 47.3036  | 31 | H | Isotropic = | 24.3863 |
| 5  | C | Isotropic = | 54.9469  | 32 | H | Isotropic = | 25.4145 |
| 6  | C | Isotropic = | 52.1010  | 33 | H | Isotropic = | 28.4066 |
| 7  | C | Isotropic = | 72.2651  | 34 | H | Isotropic = | 31.0133 |
| 8  | C | Isotropic = | 35.5006  | 35 | H | Isotropic = | 30.6263 |
| 9  | C | Isotropic = | 52.9277  | 36 | H | Isotropic = | 30.6721 |
| 10 | C | Isotropic = | -22.4746 | 37 | H | Isotropic = | 30.6941 |
| 11 | C | Isotropic = | 105.2378 | 38 | H | Isotropic = | 29.5224 |
| 12 | C | Isotropic = | 119.2896 | 39 | H | Isotropic = | 29.8903 |
| 13 | C | Isotropic = | 38.7276  | 40 | H | Isotropic = | 29.9140 |
| 14 | C | Isotropic = | 49.9270  | 41 | H | Isotropic = | 30.7893 |
| 15 | C | Isotropic = | 122.8680 | 42 | H | Isotropic = | 29.8884 |
| 16 | C | Isotropic = | 137.0406 | 43 | H | Isotropic = | 25.2216 |
| 17 | C | Isotropic = | 163.9270 | 44 | H | Isotropic = | 25.4410 |
| 18 | C | Isotropic = | 164.2834 | 45 | H | Isotropic = | 26.1526 |
| 19 | C | Isotropic = | 160.3357 | 46 | H | Isotropic = | 28.9489 |
| 20 | C | Isotropic = | 42.8063  | 47 | H | Isotropic = | 27.6230 |
| 21 | C | Isotropic = | 53.4203  | 48 | H | Isotropic = | 29.0286 |
| 23 | C | Isotropic = | 10.6569  | 49 | H | Isotropic = | 29.5085 |
| 24 | C | Isotropic = | 160.6551 |    |   |             |         |

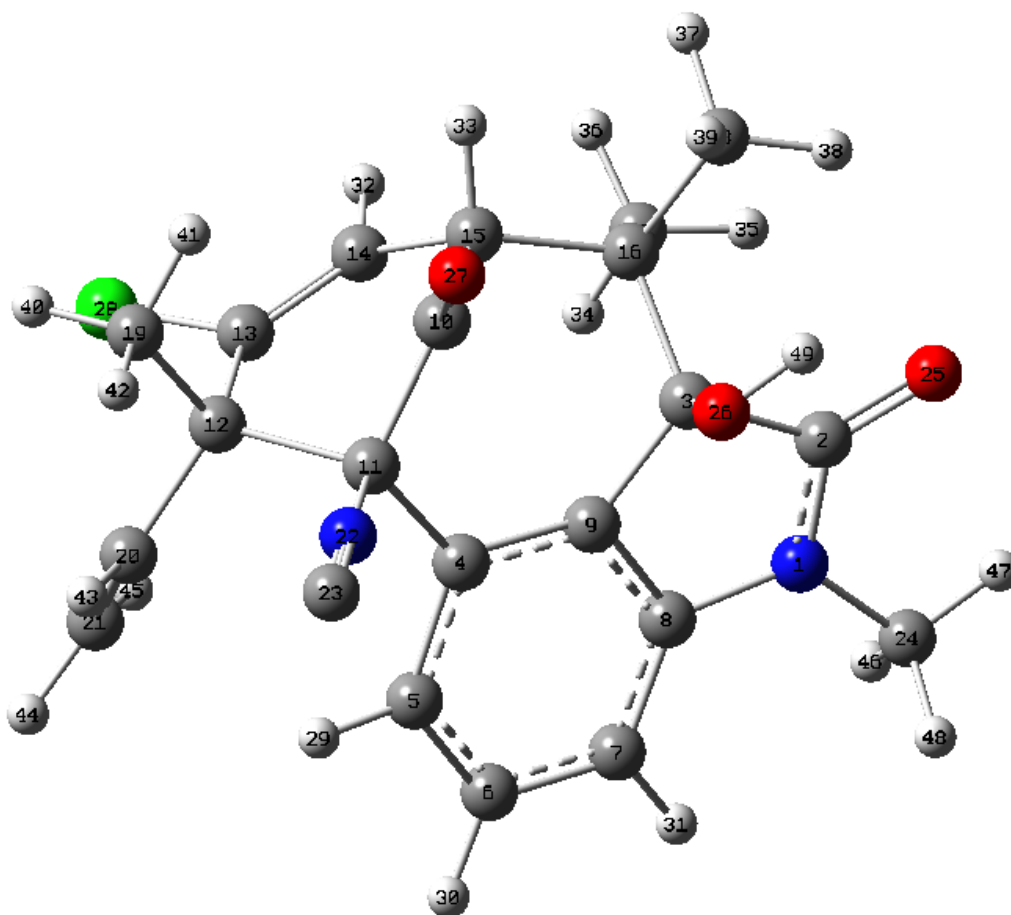

Structure 4, C3 epimer, conformer 5

Sum of electronic and thermal free energies = -1645.991068 H

| Center<br>Number | Atomic<br>Number | Coordinates (Angstroms) |           |           |
|------------------|------------------|-------------------------|-----------|-----------|
|                  |                  | X                       | Y         | Z         |
| 1                | 7                | -3.316210               | 1.144844  | -0.470852 |
| 2                | 6                | -3.353000               | -0.145626 | 0.016414  |
| 3                | 6                | -1.900274               | -0.530040 | 0.456442  |
| 4                | 6                | 0.195691                | 1.110009  | 0.426253  |
| 5                | 6                | 0.535916                | 2.470473  | 0.269947  |
| 6                | 6                | -0.371177               | 3.397256  | -0.235857 |
| 7                | 6                | -1.677562               | 3.024701  | -0.573098 |
| 8                | 6                | -2.033824               | 1.702602  | -0.342798 |
| 9                | 6                | -1.122774               | 0.741996  | 0.142090  |
| 10               | 6                | 0.725498                | -1.322317 | 1.175416  |
| 11               | 6                | 1.263098                | 0.131843  | 0.975234  |
| 12               | 6                | 2.556738                | -0.062327 | -0.003870 |
| 13               | 6                | 2.036001                | -0.767570 | -1.251864 |
| 14               | 6                | 0.981869                | -1.583705 | -1.293192 |
| 15               | 6                | 0.165831                | -1.980456 | -0.085158 |
| 16               | 6                | -1.411863               | -1.842012 | -0.237032 |
| 17               | 6                | -1.816382               | -1.832304 | -1.725165 |
| 18               | 6                | -2.065012               | -3.064028 | 0.447132  |
| 19               | 6                | 3.592983                | -0.991378 | 0.680623  |
| 20               | 6                | 3.190944                | 1.272471  | -0.365900 |
| 21               | 6                | 4.266338                | 1.816945  | 0.207755  |
| 22               | 7                | 1.721041                | 0.632824  | 2.223792  |
| 23               | 6                | 2.081051                | 1.038479  | 3.267421  |
| 24               | 6                | -4.496318               | 1.870426  | -0.902808 |
| 25               | 8                | -4.354671               | -0.833775 | 0.108351  |
| 26               | 8                | -1.897460               | -0.778516 | 1.865497  |
| 27               | 8                | 0.880065                | -1.916681 | 2.215989  |
| 28               | 17               | 3.001830                | -0.566105 | -2.720418 |
| 29               | 1                | 1.517588                | 2.808976  | 0.570713  |
| 30               | 1                | -0.063227               | 4.431928  | -0.351967 |
| 31               | 1                | -2.388990               | 3.750671  | -0.951099 |
| 32               | 1                | 0.747195                | -2.079790 | -2.227923 |
| 33               | 1                | 0.342733                | -3.052577 | 0.068531  |
| 34               | 1                | -1.453253               | -0.945486 | -2.255049 |
| 35               | 1                | -2.904431               | -1.874170 | -1.816303 |
| 36               | 1                | -1.419353               | -2.715718 | -2.234178 |
| 37               | 1                | -1.807241               | -3.967991 | -0.116408 |
| 38               | 1                | -3.151829               | -2.961174 | 0.463288  |
| 39               | 1                | -1.713413               | -3.182768 | 1.473244  |
| 40               | 1                | 4.452775                | -1.107859 | 0.016800  |
| 41               | 1                | 3.178446                | -1.980092 | 0.881730  |
| 42               | 1                | 3.937337                | -0.574397 | 1.628771  |
| 43               | 1                | 2.712322                | 1.806697  | -1.180794 |
| 44               | 1                | 4.640389                | 2.777977  | -0.133001 |
| 45               | 1                | 4.808607                | 1.349899  | 1.022736  |
| 46               | 1                | -4.369044               | 2.238269  | -1.926233 |
| 47               | 1                | -5.338560               | 1.178550  | -0.866659 |
| 48               | 1                | -4.697542               | 2.719456  | -0.239400 |
| 49               | 1                | -1.981566               | 0.058863  | 2.343130  |

|    |   |             |          |    |   |             |         |
|----|---|-------------|----------|----|---|-------------|---------|
| 2  | C | Isotropic = | 5.1952   | 29 | H | Isotropic = | 23.6966 |
| 3  | C | Isotropic = | 102.1608 | 30 | H | Isotropic = | 23.7777 |
| 4  | C | Isotropic = | 46.0600  | 31 | H | Isotropic = | 24.4347 |
| 5  | C | Isotropic = | 56.4614  | 32 | H | Isotropic = | 25.3922 |
| 6  | C | Isotropic = | 50.9654  | 33 | H | Isotropic = | 28.3243 |
| 7  | C | Isotropic = | 72.0633  | 34 | H | Isotropic = | 31.0289 |
| 8  | C | Isotropic = | 35.4876  | 35 | H | Isotropic = | 30.5817 |
| 9  | C | Isotropic = | 52.2471  | 36 | H | Isotropic = | 30.7290 |
| 10 | C | Isotropic = | -21.8691 | 37 | H | Isotropic = | 30.7986 |
| 11 | C | Isotropic = | 105.0030 | 38 | H | Isotropic = | 29.4384 |
| 12 | C | Isotropic = | 122.2357 | 39 | H | Isotropic = | 29.6777 |
| 13 | C | Isotropic = | 36.8419  | 40 | H | Isotropic = | 30.2849 |
| 14 | C | Isotropic = | 51.7461  | 41 | H | Isotropic = | 30.8969 |
| 15 | C | Isotropic = | 123.6310 | 42 | H | Isotropic = | 29.7062 |
| 16 | C | Isotropic = | 136.1821 | 43 | H | Isotropic = | 24.9935 |
| 17 | C | Isotropic = | 163.9169 | 44 | H | Isotropic = | 25.6372 |
| 18 | C | Isotropic = | 163.1060 | 45 | H | Isotropic = | 25.7188 |
| 19 | C | Isotropic = | 165.0023 | 46 | H | Isotropic = | 28.9835 |
| 20 | C | Isotropic = | 38.3576  | 47 | H | Isotropic = | 27.5879 |
| 21 | C | Isotropic = | 60.6279  | 48 | H | Isotropic = | 29.0337 |
| 23 | C | Isotropic = | 11.3981  | 49 | H | Isotropic = | 30.5600 |
| 24 | C | Isotropic = | 160.7619 |    |   |             |         |

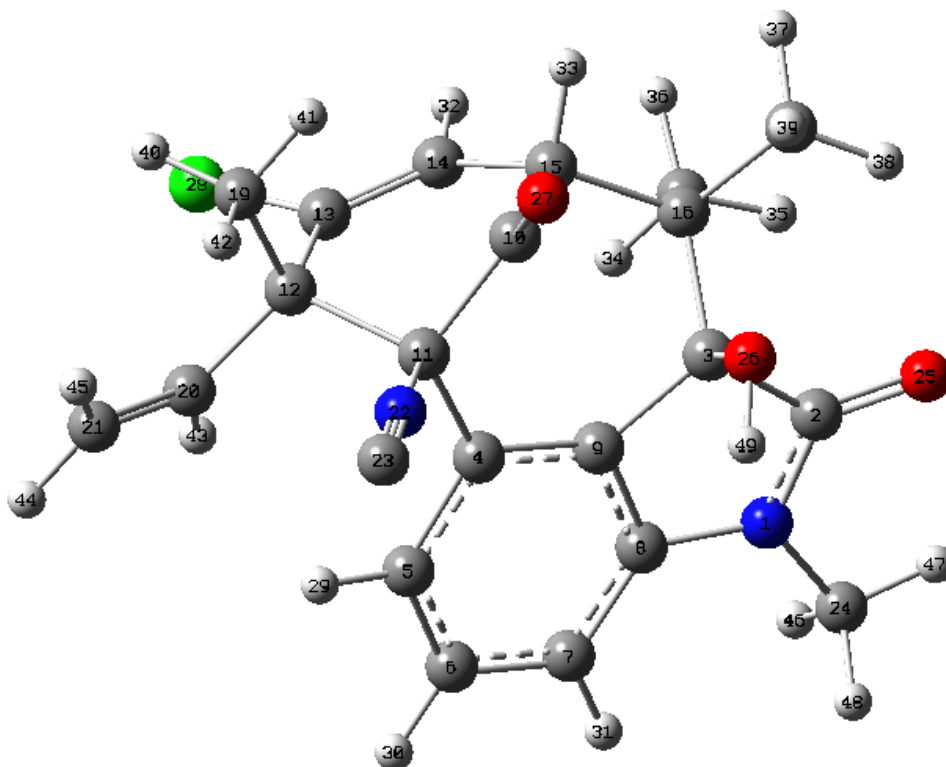

Structure 4, C3 epimer, conformer 6

Sum of electronic and thermal free energies = -1645.986160 H

| Center<br>Number | Atomic<br>Number | Coordinates (Angstroms) |           |           |
|------------------|------------------|-------------------------|-----------|-----------|
|                  |                  | X                       | Y         | Z         |
| 1                | 7                | -3.312624               | 1.070087  | -0.517719 |
| 2                | 6                | -3.323492               | -0.246966 | -0.110163 |
| 3                | 6                | -1.880062               | -0.604648 | 0.379318  |
| 4                | 6                | 0.156962                | 1.103937  | 0.542283  |
| 5                | 6                | 0.443307                | 2.484536  | 0.495961  |
| 6                | 6                | -0.476925               | 3.408969  | 0.009569  |
| 7                | 6                | -1.747298               | 3.010784  | -0.419833 |
| 8                | 6                | -2.058333               | 1.663388  | -0.294924 |
| 9                | 6                | -1.133600               | 0.707541  | 0.171626  |
| 10               | 6                | 0.735897                | -1.340861 | 1.196557  |
| 11               | 6                | 1.236535                | 0.133516  | 1.082426  |
| 12               | 6                | 2.584691                | 0.023322  | 0.157121  |
| 13               | 6                | 2.167810                | -0.661675 | -1.137978 |
| 14               | 6                | 1.133465                | -1.497661 | -1.257865 |
| 15               | 6                | 0.255063                | -1.954172 | -0.117195 |
| 16               | 6                | -1.312905               | -1.858185 | -0.354434 |
| 17               | 6                | -1.630140               | -1.772956 | -1.861439 |
| 18               | 6                | -1.962419               | -3.137148 | 0.220416  |
| 19               | 6                | 3.624972                | -0.902505 | 0.857785  |
| 20               | 6                | 3.258600                | 1.380226  | 0.032286  |
| 21               | 6                | 3.287376                | 2.220559  | -1.003236 |
| 22               | 7                | 1.631285                | 0.589556  | 2.372781  |
| 23               | 6                | 1.930996                | 0.948564  | 3.451996  |
| 24               | 6                | -4.497128               | 1.778340  | -0.965471 |
| 25               | 8                | -4.301112               | -0.975325 | -0.109797 |
| 26               | 8                | -1.933180               | -0.927604 | 1.772579  |
| 27               | 8                | 0.869596                | -1.978865 | 2.213930  |
| 28               | 17               | 3.274935                | -0.554405 | -2.518122 |
| 29               | 1                | 1.393378                | 2.843624  | 0.859876  |
| 30               | 1                | -0.206985               | 4.460228  | -0.019166 |
| 31               | 1                | -2.470221               | 3.732707  | -0.783612 |
| 32               | 1                | 0.991383                | -2.002287 | -2.206844 |
| 33               | 1                | 0.458766                | -3.026367 | -0.000361 |
| 34               | 1                | -1.261198               | -0.847576 | -2.316215 |
| 35               | 1                | -2.709337               | -1.836217 | -2.020688 |
| 36               | 1                | -1.179506               | -2.614846 | -2.395392 |
| 37               | 1                | -1.640594               | -3.999269 | -0.374910 |
| 38               | 1                | -3.051135               | -3.069846 | 0.176867  |
| 39               | 1                | -1.667942               | -3.302582 | 1.258096  |
| 40               | 1                | 4.515211                | -0.960810 | 0.226305  |
| 41               | 1                | 3.244144                | -1.914013 | 1.008749  |
| 42               | 1                | 3.916936                | -0.494254 | 1.828047  |
| 43               | 1                | 3.794607                | 1.662499  | 0.936979  |
| 44               | 1                | 3.840698                | 3.152754  | -0.929232 |
| 45               | 1                | 2.777150                | 2.032186  | -1.940362 |
| 46               | 1                | -4.335374               | 2.210442  | -1.958528 |
| 47               | 1                | -5.313299               | 1.056398  | -1.011084 |
| 48               | 1                | -4.762161               | 2.579062  | -0.265378 |
| 49               | 1                | -2.081707               | -0.121526 | 2.286962  |

|    |   |             |          |    |   |             |         |
|----|---|-------------|----------|----|---|-------------|---------|
| 2  | C | Isotropic = | 5.6260   | 29 | H | Isotropic = | 23.7169 |
| 3  | C | Isotropic = | 101.7692 | 30 | H | Isotropic = | 23.8617 |
| 4  | C | Isotropic = | 46.8953  | 31 | H | Isotropic = | 24.4447 |
| 5  | C | Isotropic = | 54.4966  | 32 | H | Isotropic = | 25.3600 |
| 6  | C | Isotropic = | 51.9572  | 33 | H | Isotropic = | 28.2891 |
| 7  | C | Isotropic = | 72.3771  | 34 | H | Isotropic = | 31.0062 |
| 8  | C | Isotropic = | 36.0630  | 35 | H | Isotropic = | 30.6048 |
| 9  | C | Isotropic = | 52.3668  | 36 | H | Isotropic = | 30.7046 |
| 10 | C | Isotropic = | -21.6655 | 37 | H | Isotropic = | 30.8278 |
| 11 | C | Isotropic = | 105.1827 | 38 | H | Isotropic = | 29.3924 |
| 12 | C | Isotropic = | 119.2166 | 39 | H | Isotropic = | 29.6543 |
| 13 | C | Isotropic = | 39.0046  | 40 | H | Isotropic = | 29.9060 |
| 14 | C | Isotropic = | 49.4286  | 41 | H | Isotropic = | 30.7720 |
| 15 | C | Isotropic = | 122.6971 | 42 | H | Isotropic = | 29.9302 |
| 16 | C | Isotropic = | 136.9722 | 43 | H | Isotropic = | 25.2462 |
| 17 | C | Isotropic = | 163.8095 | 44 | H | Isotropic = | 25.4644 |
| 18 | C | Isotropic = | 163.3482 | 45 | H | Isotropic = | 26.2006 |
| 19 | C | Isotropic = | 160.5311 | 46 | H | Isotropic = | 28.9944 |
| 20 | C | Isotropic = | 43.0063  | 47 | H | Isotropic = | 27.5786 |
| 21 | C | Isotropic = | 53.1354  | 48 | H | Isotropic = | 29.0435 |
| 23 | C | Isotropic = | 10.8252  | 49 | H | Isotropic = | 30.5209 |
| 24 | C | Isotropic = | 160.9110 |    |   |             |         |

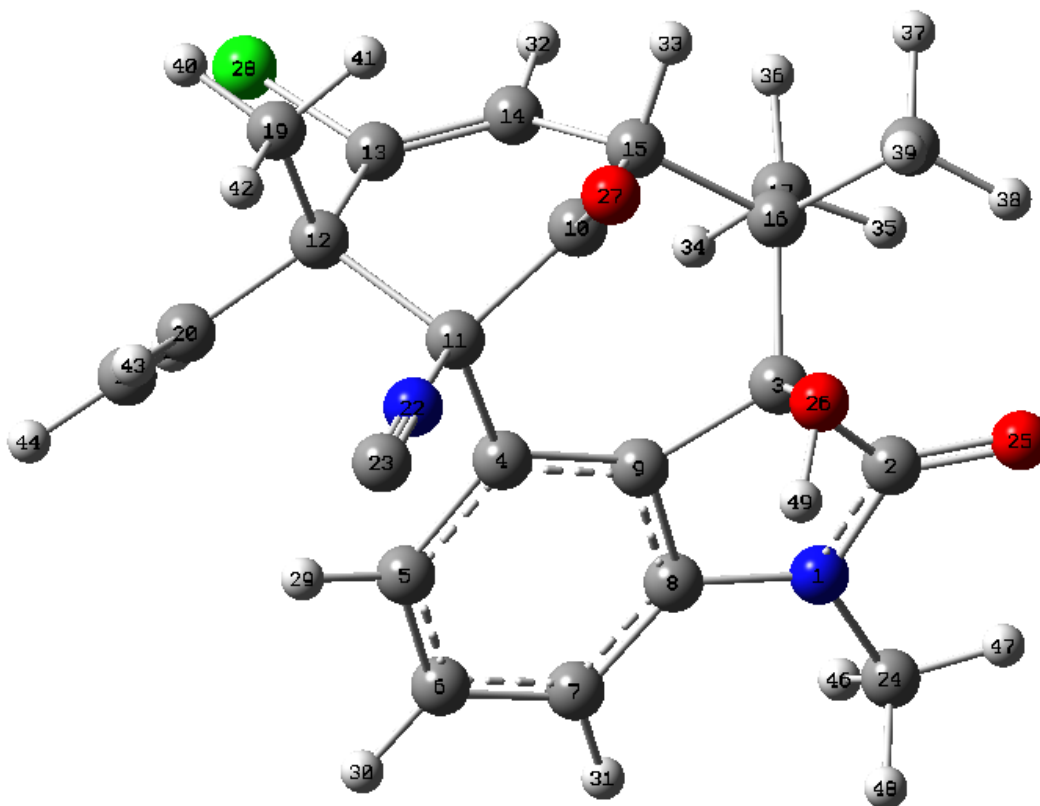



Structure 3

Sum of electronic and thermal free energies = -2044.228627 H

| Center<br>Number | Atomic<br>Number | Coordinates (Angstroms) |           |           |
|------------------|------------------|-------------------------|-----------|-----------|
|                  |                  | X                       | Y         | Z         |
| 1                | 7                | 3.491312                | -1.137705 | -0.667141 |
| 2                | 6                | 3.468337                | -0.007255 | 0.098748  |
| 3                | 6                | 1.986878                | 0.464263  | 0.228362  |
| 4                | 6                | -0.133580               | -0.961406 | -0.663930 |
| 5                | 6                | -0.448307               | -2.047557 | -1.512488 |
| 6                | 6                | 0.528610                | -2.836392 | -2.106567 |
| 7                | 6                | 1.883265                | -2.602645 | -1.856977 |
| 8                | 6                | 2.193617                | -1.523155 | -1.044414 |
| 9                | 6                | 1.225434                | -0.665468 | -0.473704 |
| 10               | 6                | -0.926198               | 0.041919  | 1.521845  |
| 11               | 6                | -1.341403               | -0.285430 | 0.058195  |
| 12               | 6                | -1.939853               | 1.036289  | -0.661648 |
| 13               | 6                | -1.153515               | 2.259394  | -0.206882 |
| 14               | 6                | -0.324087               | 2.348248  | 0.831109  |
| 15               | 6                | 0.033732                | 1.196340  | 1.733996  |
| 16               | 6                | 1.559826                | 0.785272  | 1.692658  |
| 17               | 6                | 2.368264                | 1.966387  | 2.277266  |
| 18               | 6                | 1.797448                | -0.449467 | 2.587994  |
| 19               | 6                | -3.404688               | 1.245858  | -0.205723 |
| 20               | 6                | -1.813324               | 0.867272  | -2.169007 |
| 21               | 6                | -2.805218               | 0.640241  | -3.031626 |
| 22               | 7                | -2.400780               | -1.249285 | 0.099800  |
| 23               | 6                | -3.026178               | -1.987924 | 0.812450  |
| 24               | 6                | 4.713110                | -1.784422 | -1.109825 |
| 25               | 8                | 4.449019                | 0.604419  | 0.503796  |
| 26               | 8                | 1.928088                | 1.619649  | -0.628398 |
| 27               | 8                | -1.377734               | -0.588383 | 2.453942  |
| 28               | 17               | -1.455073               | 3.726927  | -1.150965 |
| 29               | 1                | -1.488757               | -2.280390 | -1.692551 |
| 30               | 1                | 0.230614                | -3.658003 | -2.750493 |
| 31               | 1                | 2.653856                | -3.237184 | -2.280203 |
| 32               | 1                | 0.129295                | 3.307096  | 1.055940  |
| 33               | 1                | -0.141596               | 1.501619  | 2.773437  |
| 34               | 1                | 3.432782                | 1.731081  | 2.308767  |
| 35               | 1                | 2.026890                | 2.166259  | 3.298657  |
| 36               | 1                | 2.244315                | 2.887411  | 1.701496  |
| 37               | 1                | 1.399713                | -0.274079 | 3.591868  |
| 38               | 1                | 2.870180                | -0.644828 | 2.683311  |
| 39               | 1                | 1.317164                | -1.351718 | 2.199932  |
| 40               | 1                | -3.775657               | 2.193237  | -0.602938 |
| 41               | 1                | -3.467205               | 1.285730  | 0.885515  |
| 42               | 1                | -4.056144               | 0.443475  | -0.552501 |
| 43               | 1                | -0.795340               | 0.940058  | -2.545759 |
| 44               | 1                | -2.595628               | 0.529276  | -4.091361 |
| 45               | 1                | -3.845373               | 0.563052  | -2.732652 |
| 46               | 1                | 5.550706                | -1.247887 | -0.663214 |
| 47               | 1                | 4.797453                | -1.744513 | -2.201407 |
| 48               | 1                | 4.734444                | -2.830131 | -0.786015 |
| 49               | 1                | 2.712081                | 2.160658  | -0.443242 |
| 50               | 16               | -3.967455               | -3.023543 | 1.559218  |

|    |   |             |          |    |   |             |         |
|----|---|-------------|----------|----|---|-------------|---------|
| 2  | C | Isotropic = | 4.8855   | 29 | H | Isotropic = | 23.9984 |
| 3  | C | Isotropic = | 101.8740 | 30 | H | Isotropic = | 23.8156 |
| 4  | C | Isotropic = | 47.0518  | 31 | H | Isotropic = | 24.3353 |
| 5  | C | Isotropic = | 55.6586  | 32 | H | Isotropic = | 24.8723 |
| 6  | C | Isotropic = | 50.8762  | 33 | H | Isotropic = | 28.3058 |
| 7  | C | Isotropic = | 72.5542  | 34 | H | Isotropic = | 29.2384 |
| 8  | C | Isotropic = | 34.1863  | 35 | H | Isotropic = | 30.8878 |
| 9  | C | Isotropic = | 54.4800  | 36 | H | Isotropic = | 29.9737 |
| 10 | C | Isotropic = | -22.5835 | 37 | H | Isotropic = | 30.5709 |
| 11 | C | Isotropic = | 95.1988  | 38 | H | Isotropic = | 30.8818 |
| 12 | C | Isotropic = | 121.3605 | 39 | H | Isotropic = | 31.3575 |
| 13 | C | Isotropic = | 38.4718  | 40 | H | Isotropic = | 30.0976 |
| 14 | C | Isotropic = | 52.7774  | 41 | H | Isotropic = | 30.6923 |
| 15 | C | Isotropic = | 122.6604 | 42 | H | Isotropic = | 29.7414 |
| 16 | C | Isotropic = | 135.8042 | 43 | H | Isotropic = | 25.8781 |
| 17 | C | Isotropic = | 166.1601 | 44 | H | Isotropic = | 26.0590 |
| 18 | C | Isotropic = | 164.0081 | 45 | H | Isotropic = | 26.0025 |
| 19 | C | Isotropic = | 165.5144 | 46 | H | Isotropic = | 27.5723 |
| 20 | C | Isotropic = | 37.4105  | 47 | H | Isotropic = | 28.9626 |
| 21 | C | Isotropic = | 64.0130  | 48 | H | Isotropic = | 28.9522 |
| 23 | C | Isotropic = | 33.9484  | 49 | H | Isotropic = | 29.4462 |
| 24 | C | Isotropic = | 160.3097 |    |   |             |         |

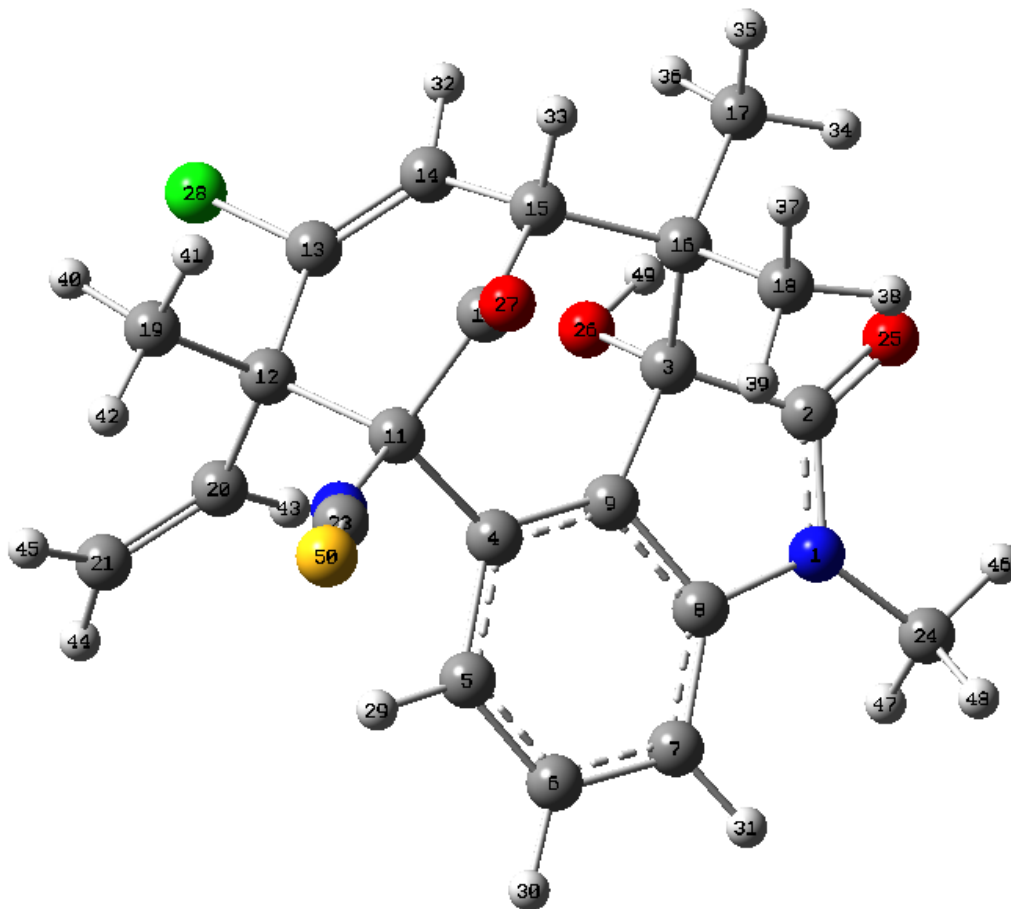

Structure 3, C3 epimer

Sum of electronic and thermal free energies = -2044.226582 H

| Center<br>Number | Atomic<br>Number | Coordinates (Angstroms) |           |           |
|------------------|------------------|-------------------------|-----------|-----------|
|                  |                  | X                       | Y         | Z         |
| 1                | 7                | 3.508897                | 0.034700  | 1.185185  |
| 2                | 6                | 3.461453                | 0.331733  | -0.153051 |
| 3                | 6                | 1.966000                | 0.401803  | -0.582116 |
| 4                | 6                | -0.111304               | 0.205516  | 1.063527  |
| 5                | 6                | -0.435091               | 0.191248  | 2.437306  |
| 6                | 6                | 0.537608                | 0.016818  | 3.417095  |
| 7                | 6                | 1.890944                | -0.110910 | 3.081768  |
| 8                | 6                | 2.214182                | -0.013667 | 1.736157  |
| 9                | 6                | 1.242227                | 0.135284  | 0.728037  |
| 10               | 6                | -0.725084               | 0.459204  | -1.433944 |
| 11               | 6                | -1.250533               | 0.387511  | 0.031499  |
| 12               | 6                | -2.314605               | -0.848701 | 0.005622  |
| 13               | 6                | -1.550717               | -2.067344 | -0.500202 |
| 14               | 6                | -0.494633               | -2.028799 | -1.313731 |
| 15               | 6                | 0.069515                | -0.759401 | -1.906174 |
| 16               | 6                | 1.641233                | -0.566342 | -1.772568 |
| 17               | 6                | 2.342801                | -1.921963 | -1.550555 |
| 18               | 6                | 2.151556                | 0.042890  | -3.098071 |
| 19               | 6                | -3.443991               | -0.532057 | -1.008790 |
| 20               | 6                | -2.897771               | -1.117065 | 1.385510  |
| 21               | 6                | -4.077035               | -0.690080 | 1.842611  |
| 22               | 7                | -1.968062               | 1.577656  | 0.363280  |
| 23               | 6                | -2.174575               | 2.717022  | 0.037974  |
| 24               | 6                | 4.738606                | 0.001779  | 1.955649  |
| 25               | 8                | 4.422504                | 0.567687  | -0.872661 |
| 26               | 8                | 1.697331                | 1.770336  | -0.903737 |
| 27               | 8                | -1.030153               | 1.365191  | -2.175190 |
| 28               | 17               | -2.213061               | -3.648178 | -0.059791 |
| 29               | 1                | -1.461894               | 0.344490  | 2.738410  |
| 30               | 1                | 0.241807                | -0.000457 | 4.461714  |
| 31               | 1                | 2.651105                | -0.228044 | 3.846218  |
| 32               | 1                | -0.072017               | -2.964162 | -1.662136 |
| 33               | 1                | -0.123922               | -0.810457 | -2.985629 |
| 34               | 1                | 2.085865                | -2.370219 | -0.585513 |
| 35               | 1                | 3.427262                | -1.794094 | -1.598822 |
| 36               | 1                | 2.068332                | -2.632093 | -2.336814 |
| 37               | 1                | 2.038672                | -0.692049 | -3.902375 |
| 38               | 1                | 3.211259                | 0.303132  | -3.027751 |
| 39               | 1                | 1.576691                | 0.928942  | -3.382477 |
| 40               | 1                | -4.158028               | -1.358859 | -1.016138 |
| 41               | 1                | -3.055202               | -0.406748 | -2.020645 |
| 42               | 1                | -3.973162               | 0.383702  | -0.737975 |
| 43               | 1                | -2.282292               | -1.729326 | 2.037431  |
| 44               | 1                | -4.399704               | -0.946336 | 2.847548  |
| 45               | 1                | -4.757634               | -0.080157 | 1.258455  |
| 46               | 1                | 4.831705                | -0.949218 | 2.489822  |
| 47               | 1                | 5.568994                | 0.110459  | 1.257192  |
| 48               | 1                | 4.765071                | 0.824457  | 2.679261  |
| 49               | 1                | 2.335551                | 2.059062  | -1.573813 |
| 50               | 16               | -2.567777               | 4.231745  | -0.213587 |

|    |   |             |          |    |   |             |         |
|----|---|-------------|----------|----|---|-------------|---------|
| 2  | C | Isotropic = | 4.1786   | 29 | H | Isotropic = | 23.7346 |
| 3  | C | Isotropic = | 102.7844 | 30 | H | Isotropic = | 23.8586 |
| 4  | C | Isotropic = | 46.5561  | 31 | H | Isotropic = | 24.4441 |
| 5  | C | Isotropic = | 55.9890  | 32 | H | Isotropic = | 25.3803 |
| 6  | C | Isotropic = | 51.8771  | 33 | H | Isotropic = | 28.1997 |
| 7  | C | Isotropic = | 72.5350  | 34 | H | Isotropic = | 30.9148 |
| 8  | C | Isotropic = | 34.3350  | 35 | H | Isotropic = | 30.6643 |
| 9  | C | Isotropic = | 53.3429  | 36 | H | Isotropic = | 30.6711 |
| 10 | C | Isotropic = | -25.4087 | 37 | H | Isotropic = | 30.7396 |
| 11 | C | Isotropic = | 99.9395  | 38 | H | Isotropic = | 29.5377 |
| 12 | C | Isotropic = | 122.9421 | 39 | H | Isotropic = | 29.8480 |
| 13 | C | Isotropic = | 35.4253  | 40 | H | Isotropic = | 30.2733 |
| 14 | C | Isotropic = | 51.8841  | 41 | H | Isotropic = | 30.9084 |
| 15 | C | Isotropic = | 123.6216 | 42 | H | Isotropic = | 29.6995 |
| 16 | C | Isotropic = | 136.1963 | 43 | H | Isotropic = | 24.9076 |
| 17 | C | Isotropic = | 163.4768 | 44 | H | Isotropic = | 25.7231 |
| 18 | C | Isotropic = | 163.6791 | 45 | H | Isotropic = | 25.8722 |
| 19 | C | Isotropic = | 165.1487 | 46 | H | Isotropic = | 28.9125 |
| 20 | C | Isotropic = | 36.7707  | 47 | H | Isotropic = | 27.5861 |
| 21 | C | Isotropic = | 61.9335  | 48 | H | Isotropic = | 29.0421 |
| 23 | C | Isotropic = | 32.4181  | 49 | H | Isotropic = | 29.5902 |
| 24 | C | Isotropic = | 160.6404 |    |   |             |         |

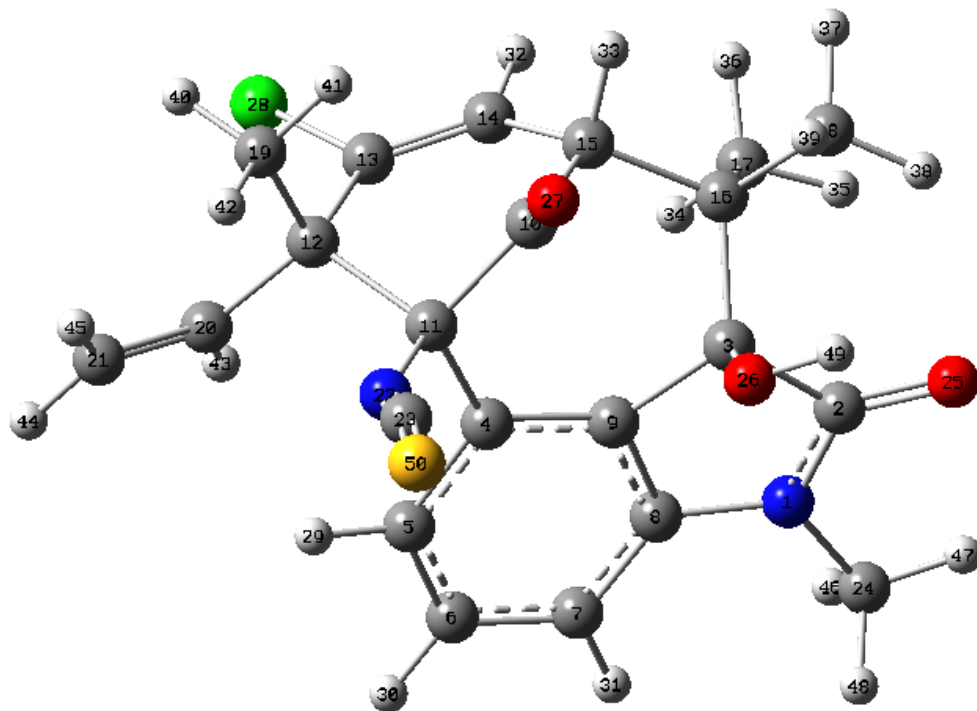

**$^1\text{H}$  and  $^2\text{H}$  NMR Spectra:**

Current Data Parameters  
 NAME ADH-3-115-p  
 EXPNO 1  
 PROCNO 1  
 F2 - Acquisition Parameters  
 Date\_ 20110702  
 Time 12:52  
 INSTRUM arx500  
 PROBHD 5 mm broadband  
 PULPROG zg30  
 TD 65536  
 SOLVENT CDCl3  
 NS 8  
 DS 0  
 SWH 10000.000 Hz  
 FIDRES 0.152588 Hz  
 AQ 3.2768500 sec  
 RG 2860  
 DW 50.000 usec  
 DE 71.43 usec  
 TE 300.0 K  
 D1 2.00000000 sec  
 P1 11.00 usec  
 SFO1 500.1330003 MHz  
 NUCLEUS 1H  
 F2 - Processing parameters  
 SI 32768  
 SF 500.1300237 MHz  
 WDW EM  
 SSB 0  
 LB 0.30 Hz  
 GB 0  
 PC 1.00

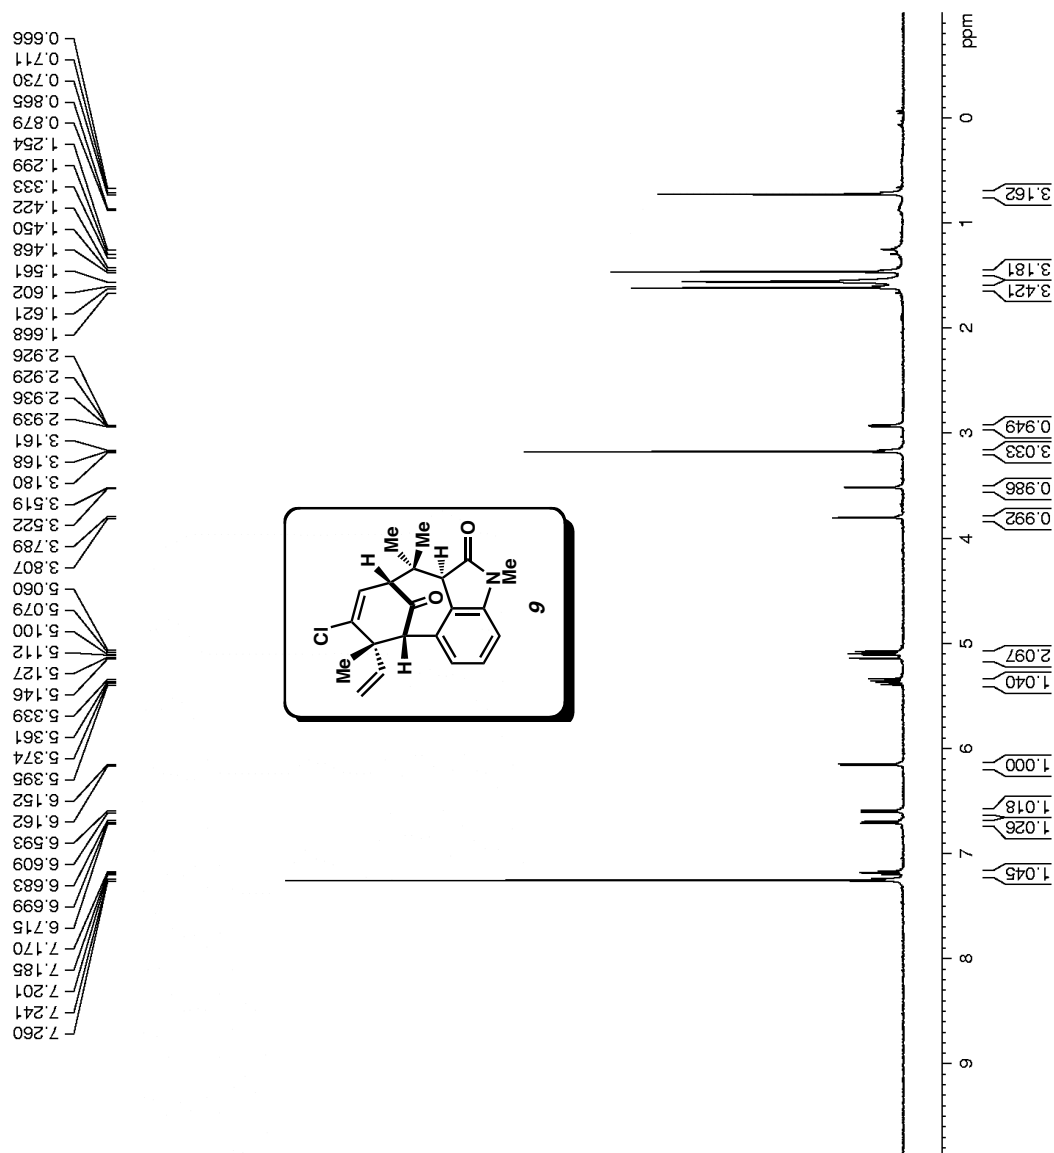

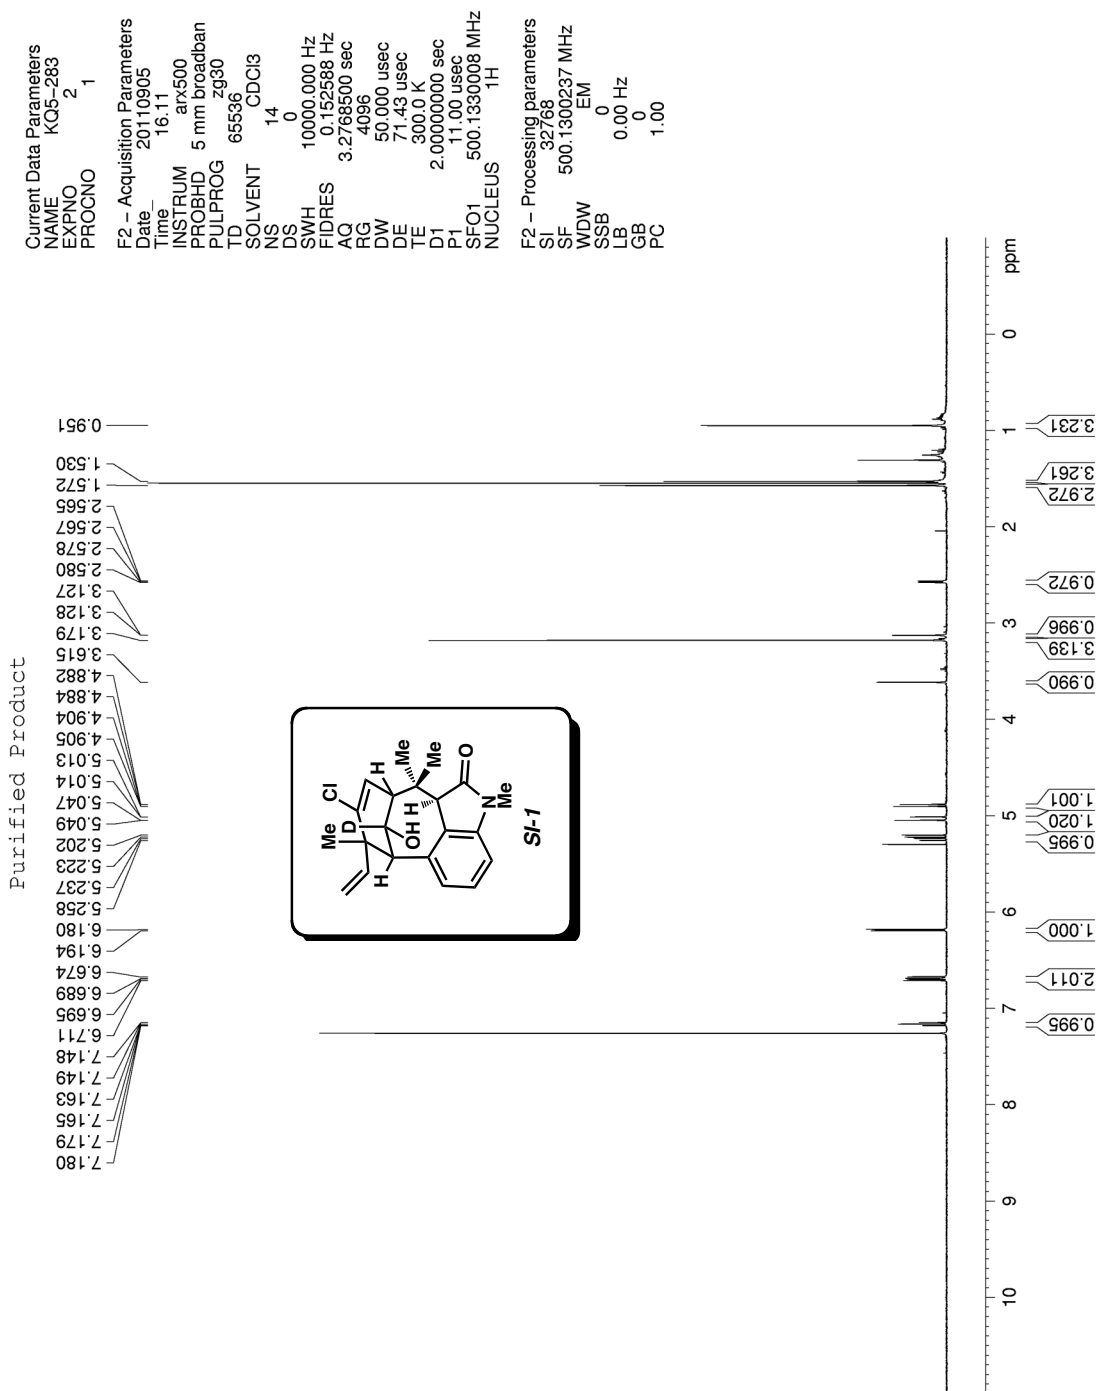

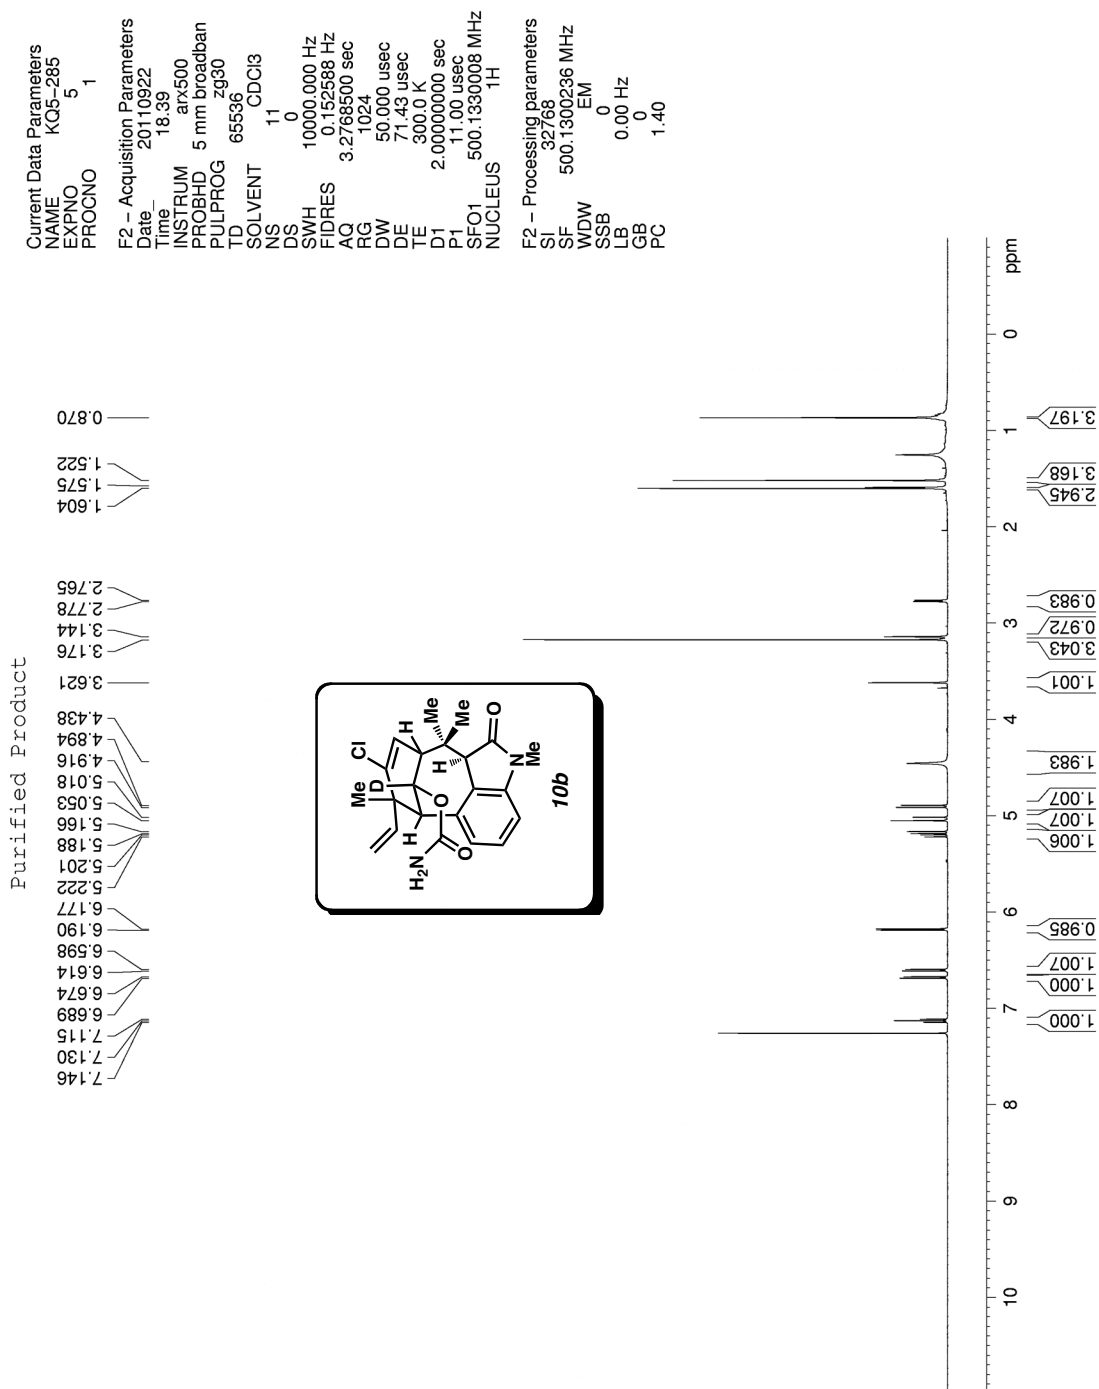



Purified Product

```

Current Data Parameters
NAME      KQ5-285
EXPNO     7
PROCNO    1

F2 - Acquisition Parameters
Date_     20110929
Time      7.31
INSTRUM   avance500
PROBHD    5 mm bb-ZZ800
PULPROG   zg2h
TD         15318
SOLVENT   CDCl3
NS         71
DS         0
SWH        1531.863 Hz
FIDRES     0.100004 Hz
AQ         5.0001717 sec
RG         57
DW         326.400 usec
DE         6.00 usec
TE         296.5 K
D1         1.00000000 sec
d11        0.03000000 sec
D20        0.02000000 sec
MCREST     0.00000000 sec
MCWRK     0.01500000 sec

===== CHANNEL f1 =====
NUC1       2H
P1         100.00 usec
PL1        6.00 dB
SFO1       76.8041618 MHz

F2 - Processing parameters
SI         65536
WDW        EM
SSB        0
LB         0
GB         0
    
```

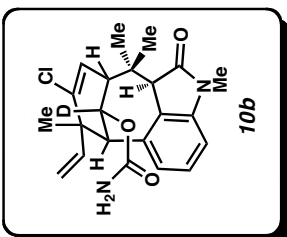

5.478

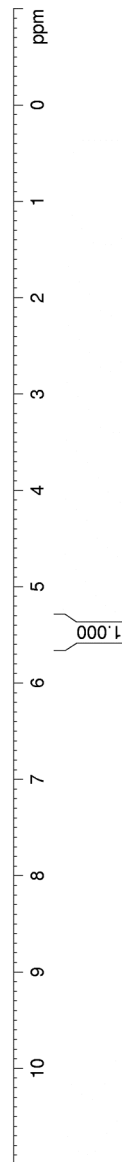

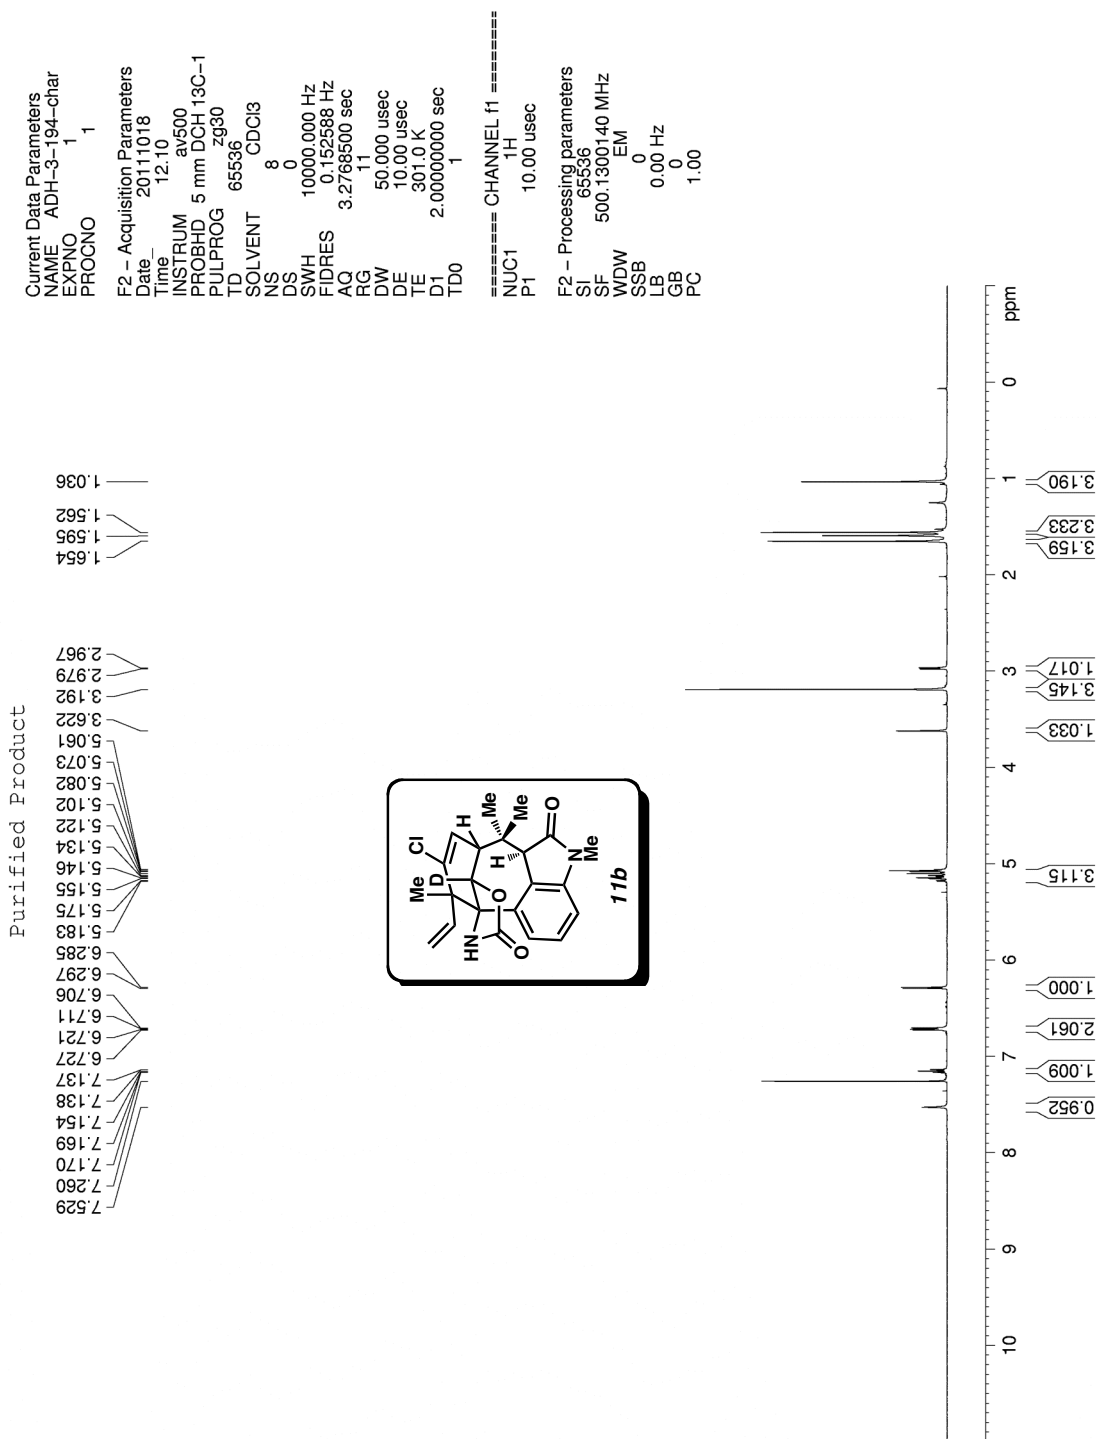

```

Current Data Parameters
NAME_ ADH-3-194-char
EXPNO_ 3
PROCNO_ 1

F2 - Acquisition Parameters
Date_ 20111019
Time_ 7.58
INSTRUM_ avance500
PROBHD_ 5 mm bb-Z Z800
PULPROG_ zg2h
TD_ 15318
SOLVENT_ CDCl3
NS_ 280
DS_ 0
SWH_ 1531.863 Hz
FIDRES_ 0.100004 Hz
AQ_ 5.0001717 sec
RG_ 90.5
DW_ 326.400 usec
DE_ 6.00 usec
TE_ 296.8 K
D1_ 1.00000000 sec
d11_ 0.03000000 sec
D20_ 0.02000000 sec
MCREST_ 0.00000000 sec
MCWRK_ 0.01500000 sec

===== CHANNEL f1 =====
NUC1_ 2H
P1_ 100.00 usec
PL1_ 6.00 dB
SFO1_ 76.8041618 MHz

F2 - Processing parameters
SI_ 65536
SF_ 76.8036881 MHz
WDW_ EM
SSB_ 0
LB_ 0
GB_ 0
    
```

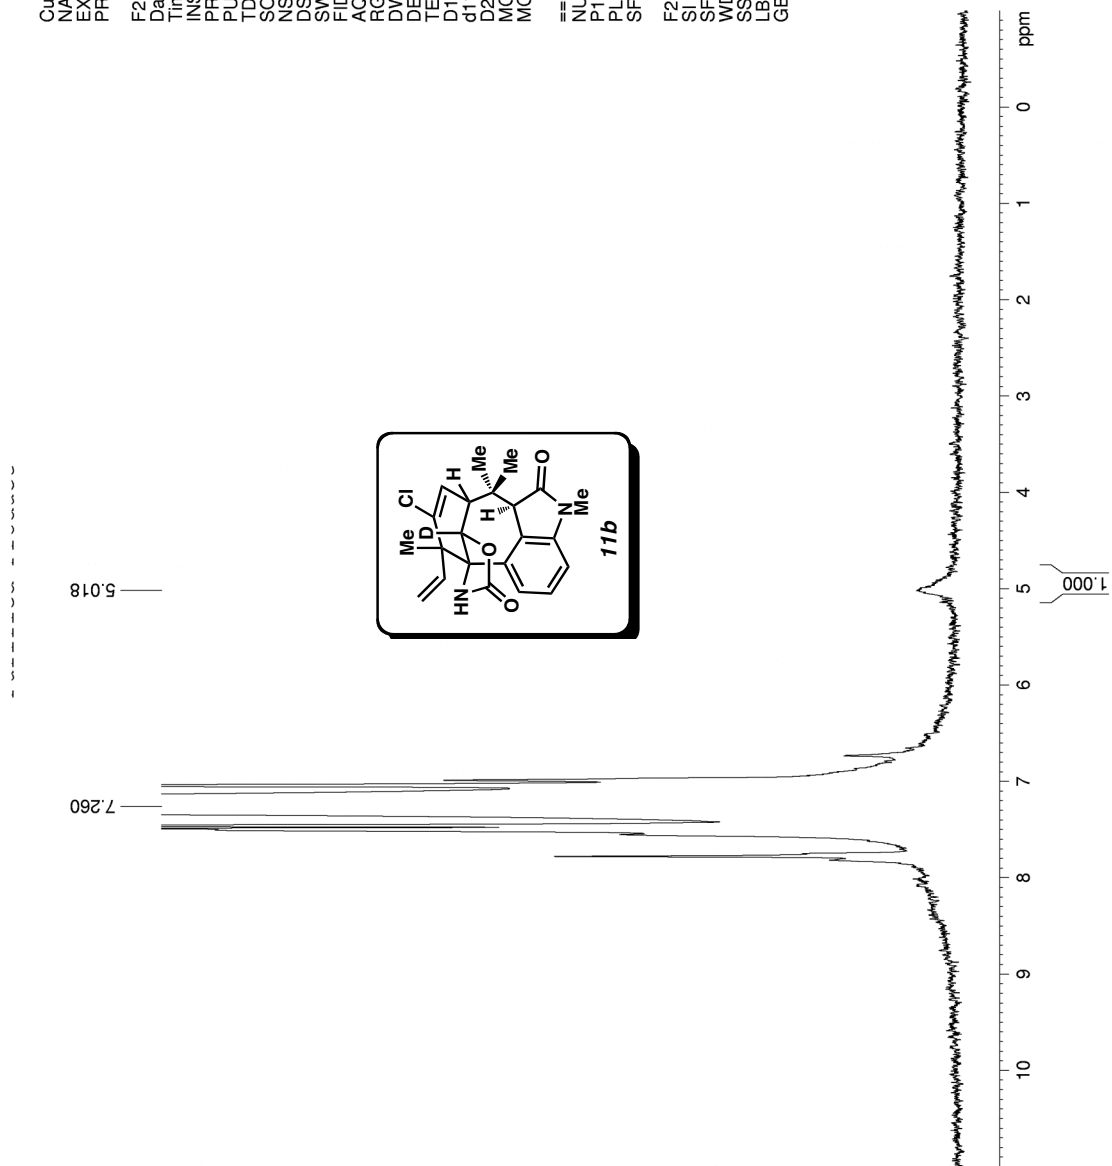

Current Data Parameters  
 NAME KCB-241  
 EXPNO 4  
 PROCNO 1

F2 - Acquisition Parameters  
 Date\_ 20110707  
 Time\_ 15:36  
 INSTRUM avance600  
 PROBHD 5 mm bb-Z Z800  
 PULPROG zg30  
 TD 65536  
 SOLVENT CDCl3  
 NS 20  
 DS 0  
 SWH 10000.000 Hz  
 FIDRES 0.152588 Hz  
 AQ 3.2769001 sec  
 RG 256  
 DW 50.000 usec  
 DE 6.00 usec  
 TE 296.7 K  
 D1 2.00000000 sec  
 MCREST 0.00000000 sec  
 MCWRK 0.01500000 sec

===== CHANNEL f1 =====  
 NUC1 1H  
 P1 12.00 usec  
 PL1 0.00 dB  
 SFO1 500.3330020 MHz

F2 - Processing parameters  
 SI 32768  
 SF 500.3300220 MHz  
 EM  
 WDW EM  
 SSB 0  
 LB 0.00 Hz  
 GB 0  
 PC 1.00

0.777  
 1.242  
 1.251  
 1.257  
 1.271  
 1.312  
 1.651  
 1.691  
 2.043  
 3.147  
 3.156  
 3.185  
 3.819  
 5.154  
 5.188  
 5.217  
 5.238  
 5.416  
 5.437  
 5.450  
 5.472  
 6.178  
 6.186  
 6.739  
 6.754  
 7.253  
 7.260  
 7.268  
 7.284  
 7.320  
 7.336  
 7.337

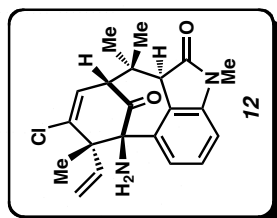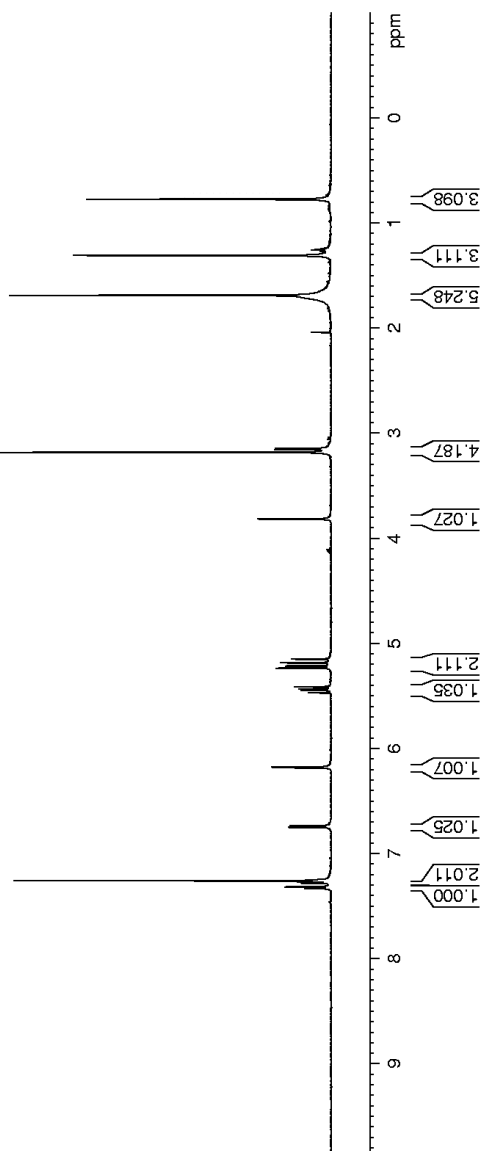

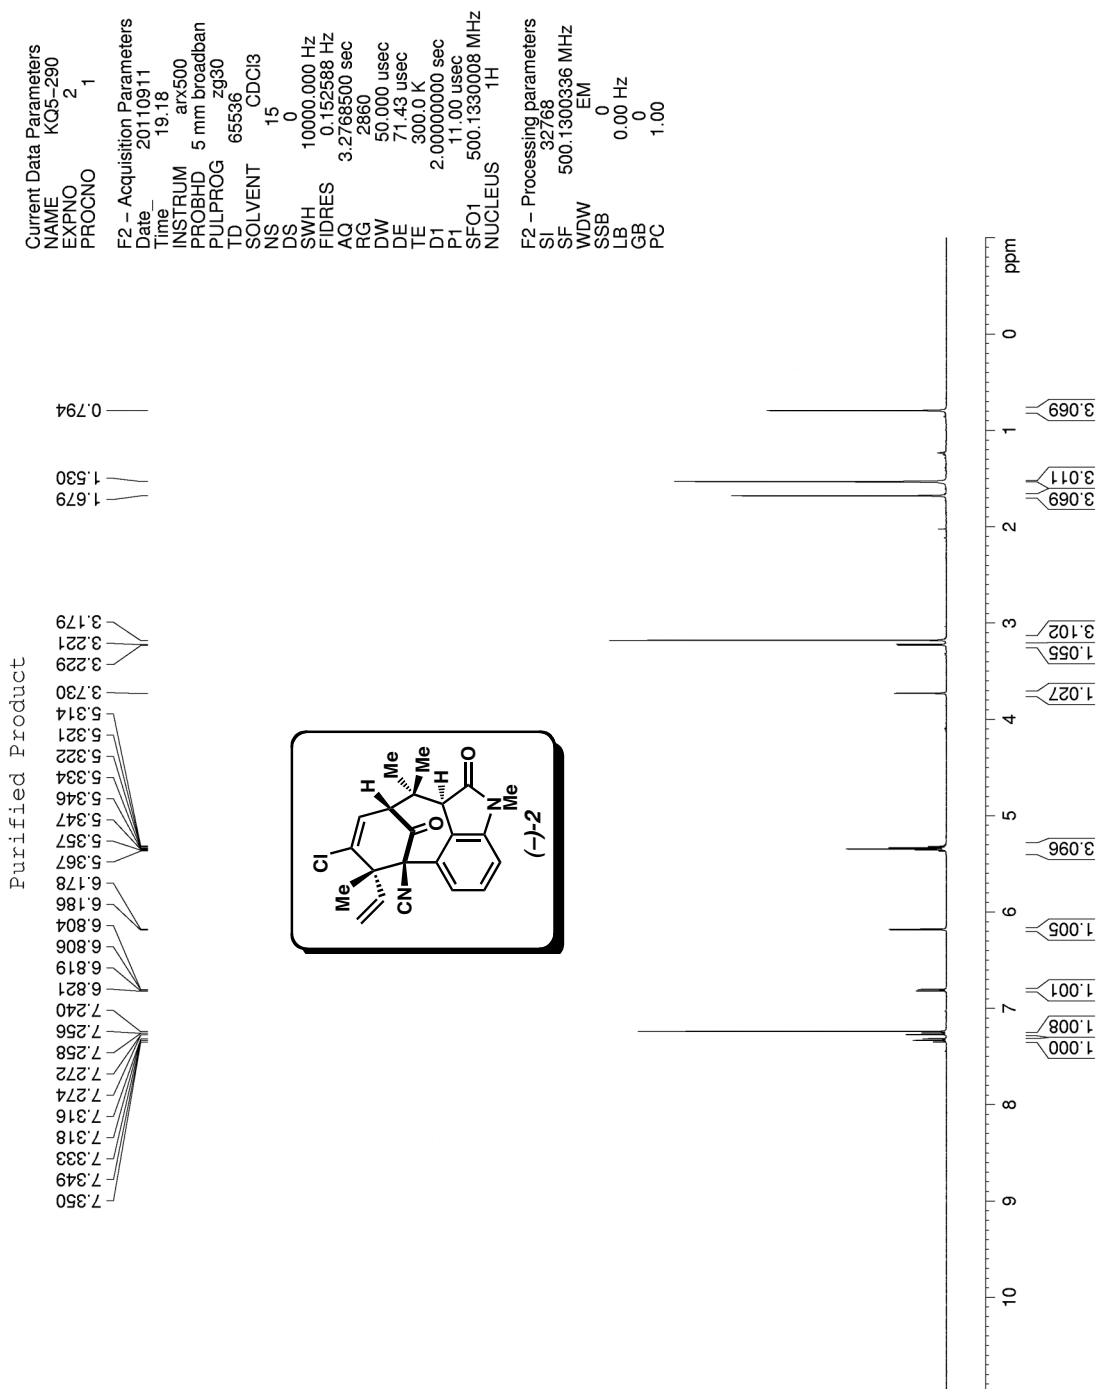

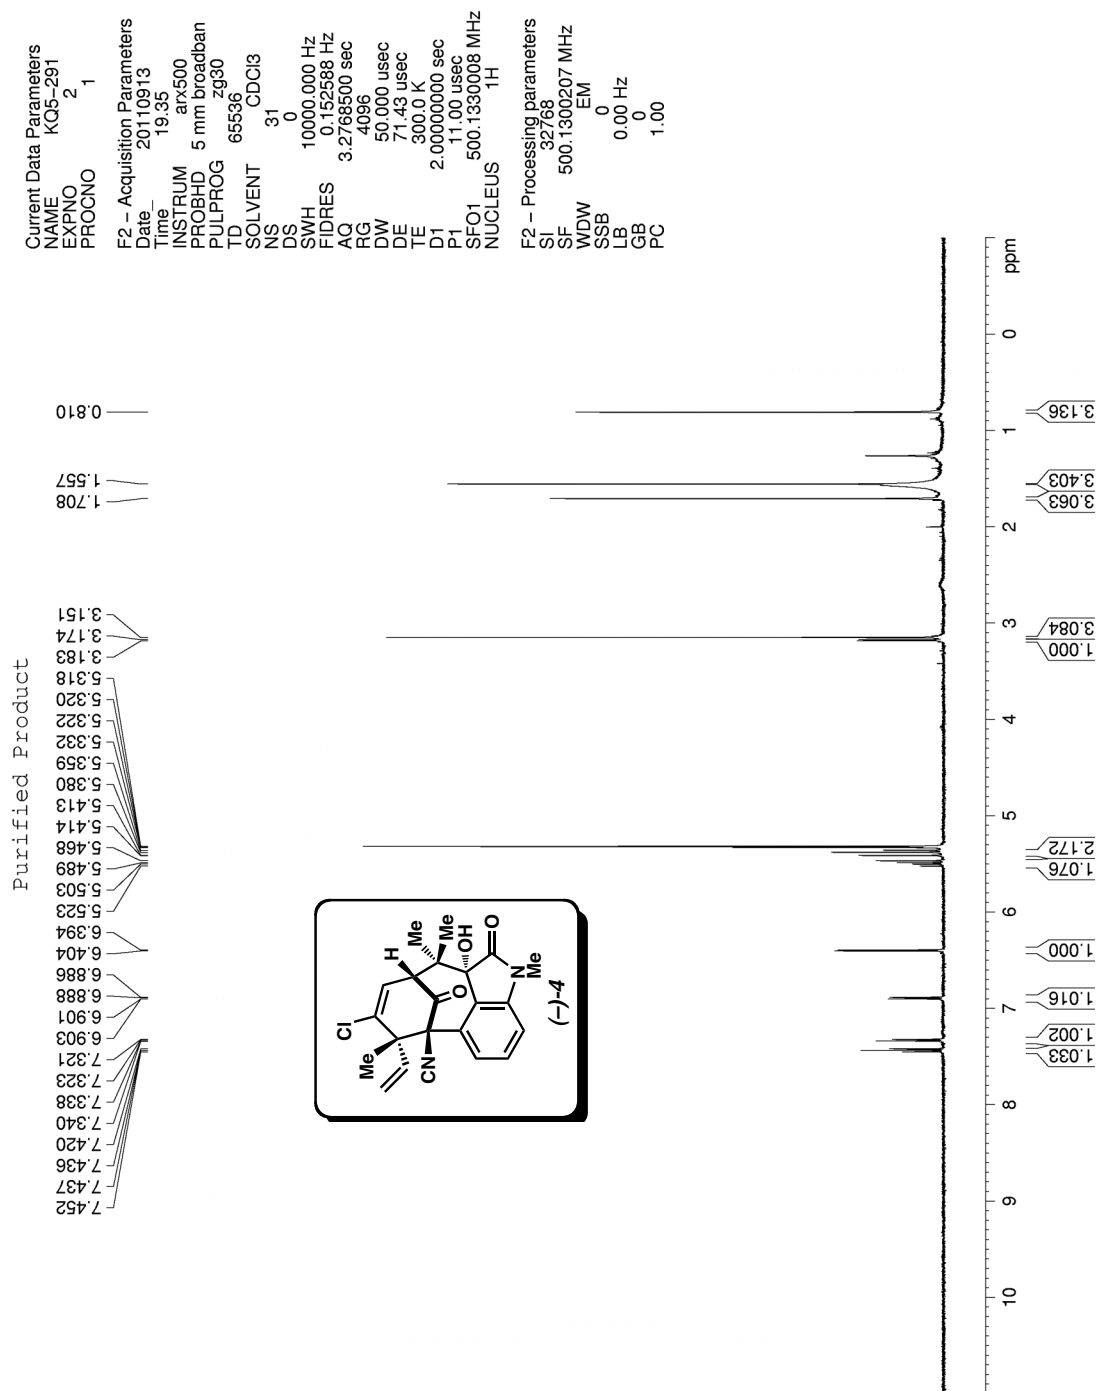

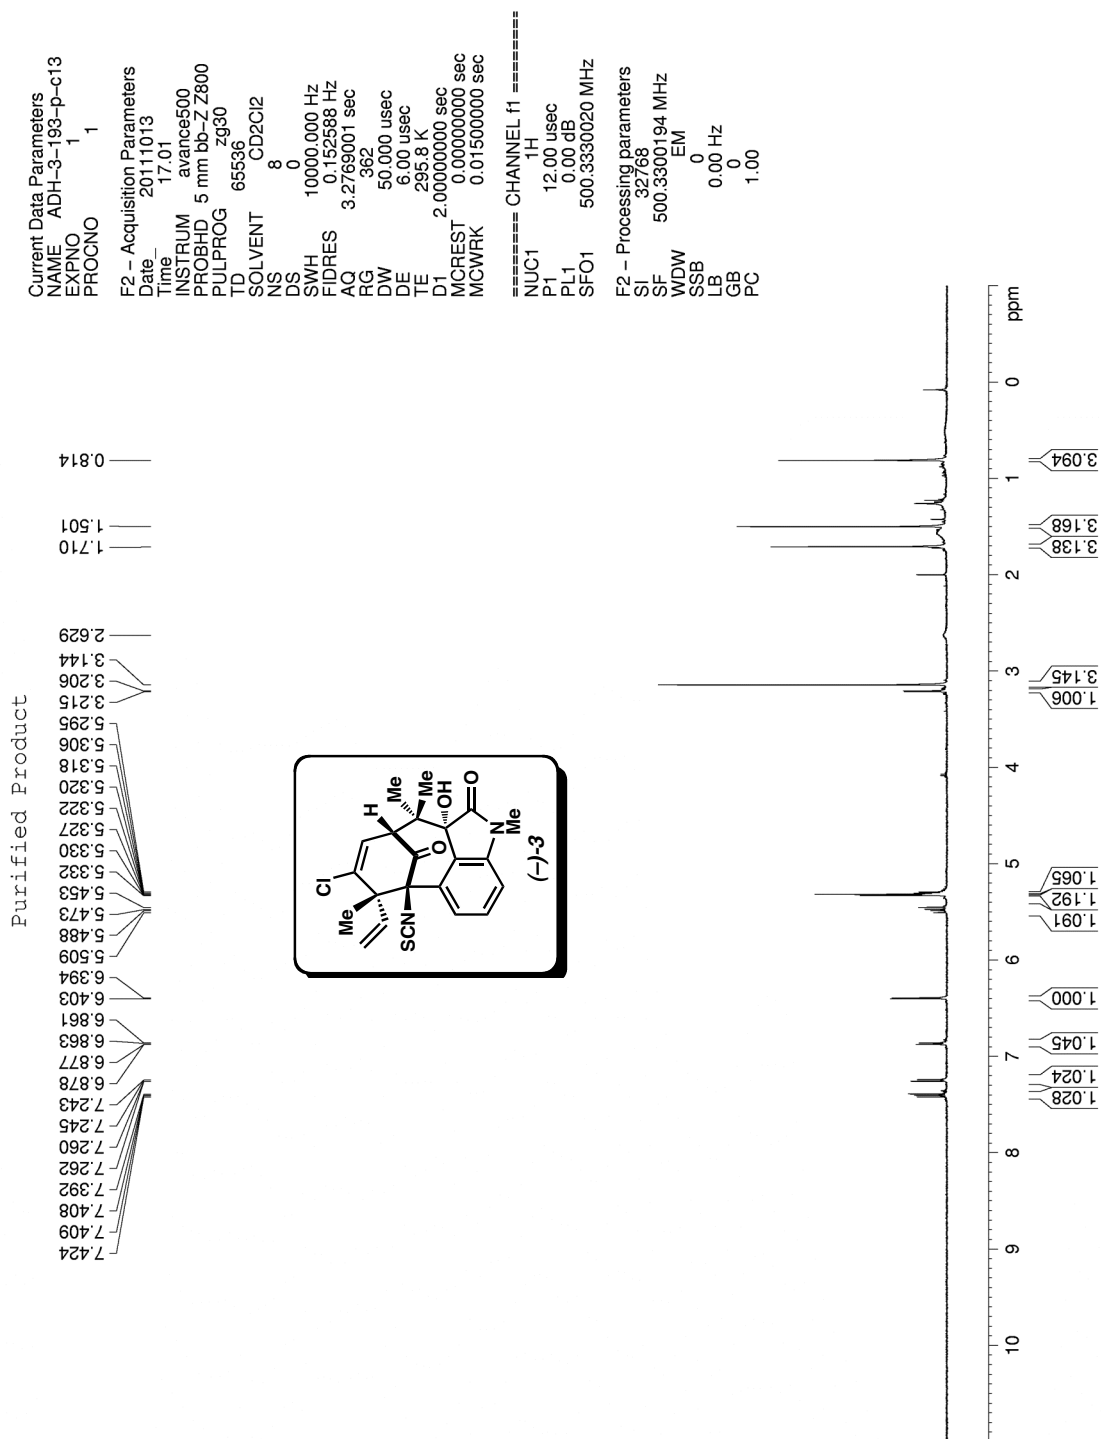

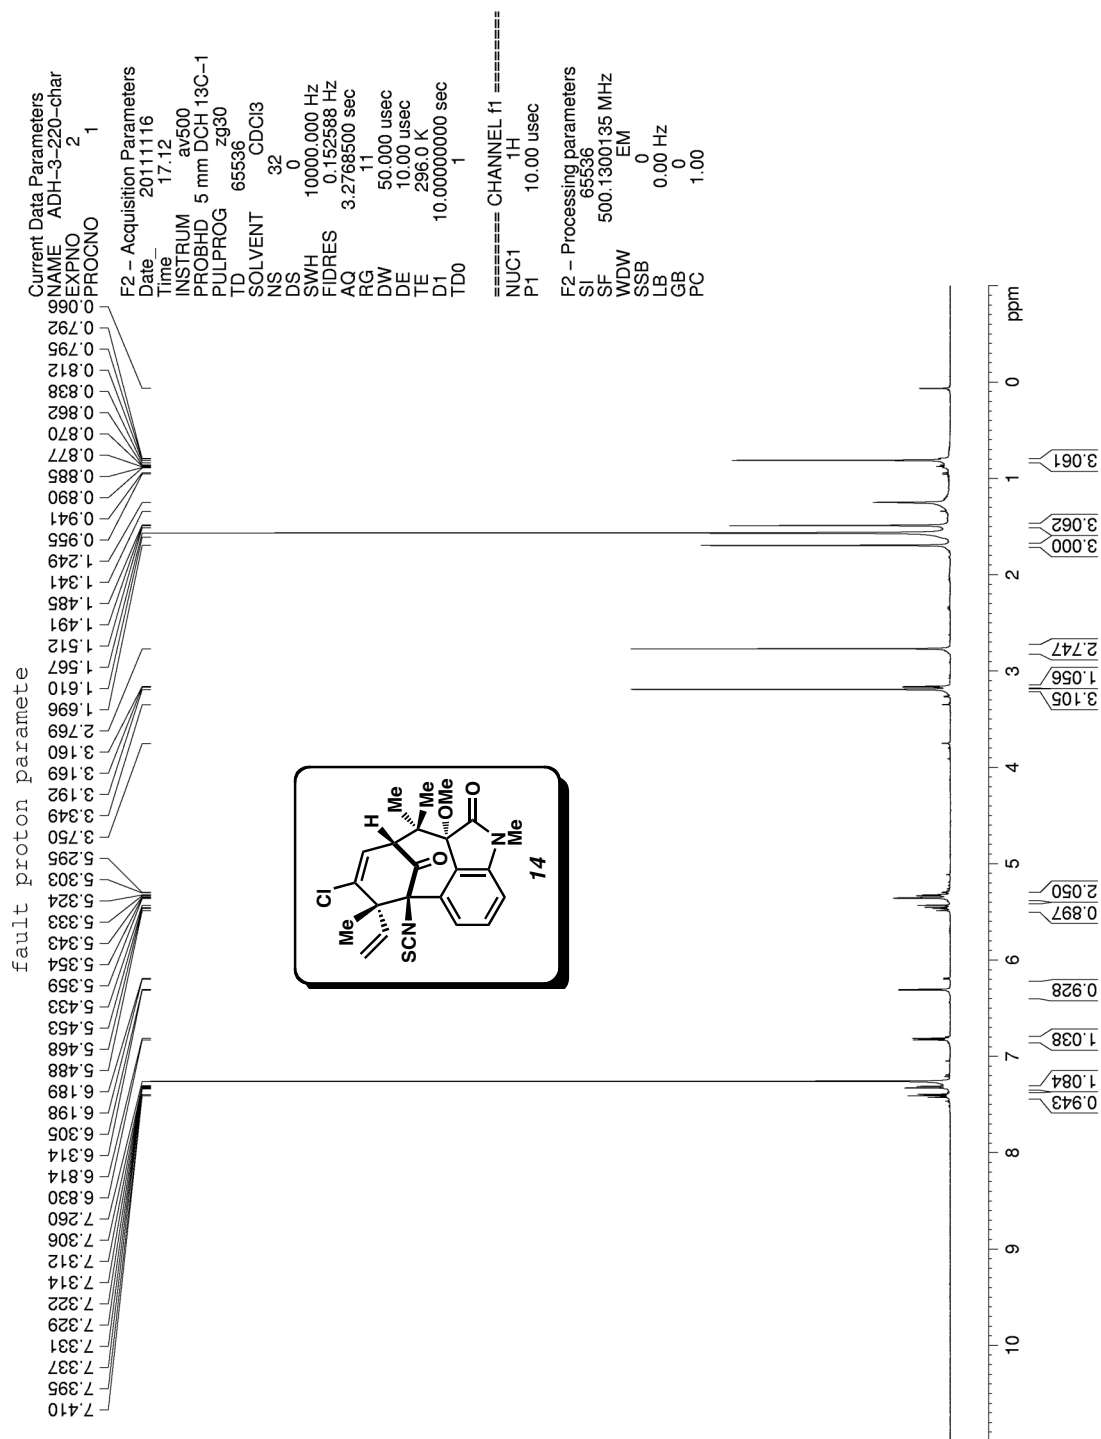



**$^{13}\text{C}$  NMR Spectra:**

```

Current Data Parameters
NAME      BSI-207
EXPNO     8
PROCNO    1

F2 - Acquisition Parameters
Date_     20110623
Time      5:25
INSTRUM   avance500
PROBHD    5 mm bb-z zgpg30
PULPROG   zgpg30
TD         65536
SOLVENT   CDCl3
NS         13268
DS         0
SWH        32679.738 Hz
FIDRES     0.498653 Hz
AQ         1.0027661 sec
RG          35470
BW          15.300 usec
DE          6.00 usec
TE          297.5 K
D1          2.00000000 sec
d11         0.03000000 sec
MCREST     0.00000000 sec
MCWPRK     0.01500000 sec

===== CHANNEL f1 =====
NUC1       13C
P1          12C
PL1         6.20 usec
PL12        0.00 dB
SFO1        125.8231939 MHz

===== CHANNEL f2 =====
CPDPRG2    waitz16
NUC2        1H
PCPD2       100.00 usec
PL2         0.00 dB
PL12        16.10 dB
SFO2        500.3320013 MHz

F2 - Processing parameters
SI          65536
SF          125.8080630 MHz
WDW         EM
SSB         0
LB          1.00 Hz
GB          0
PC          1.40
    
```

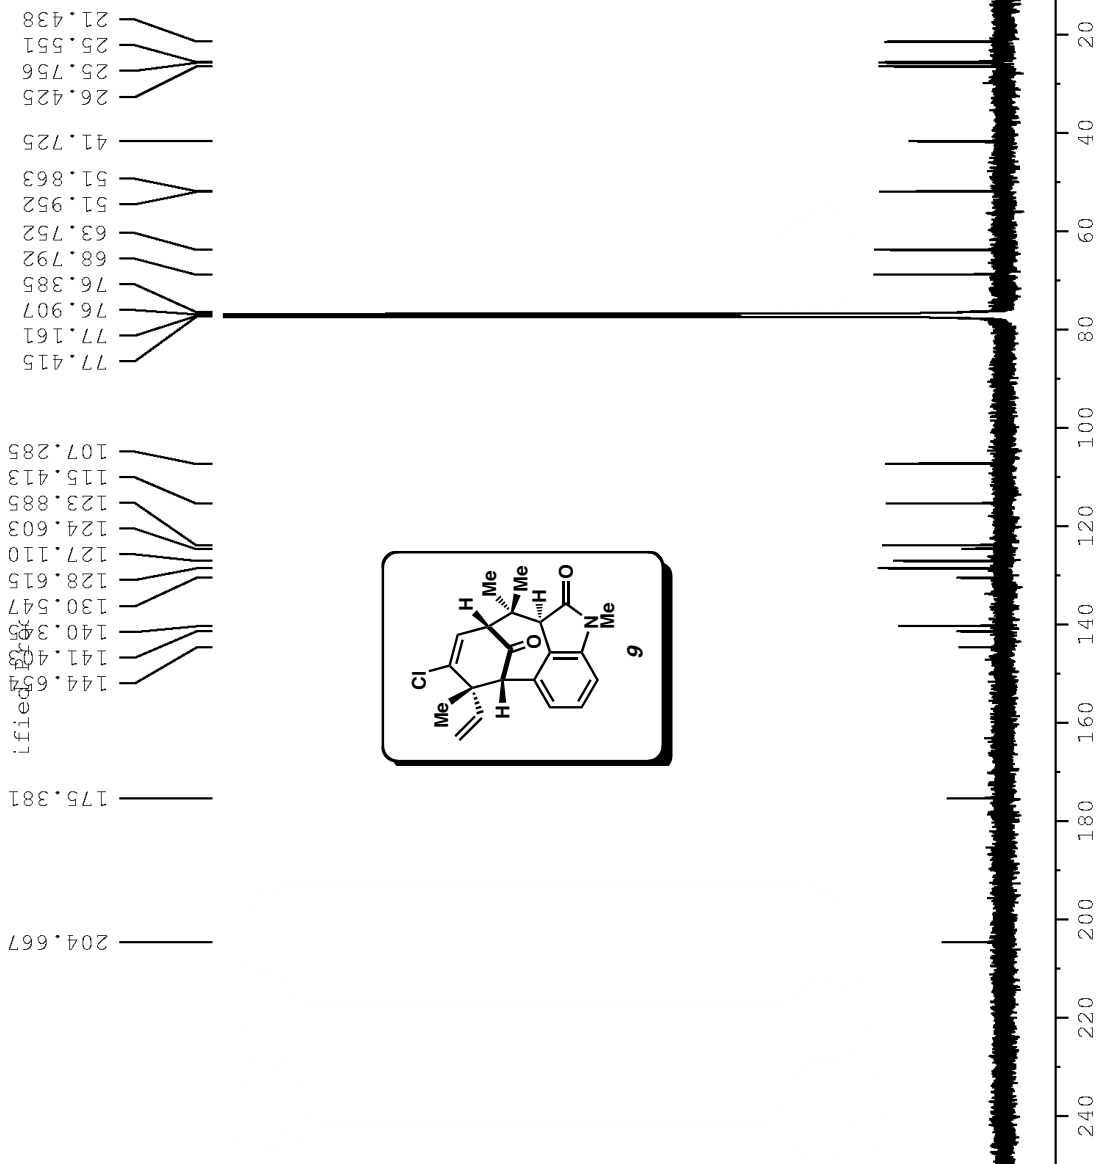

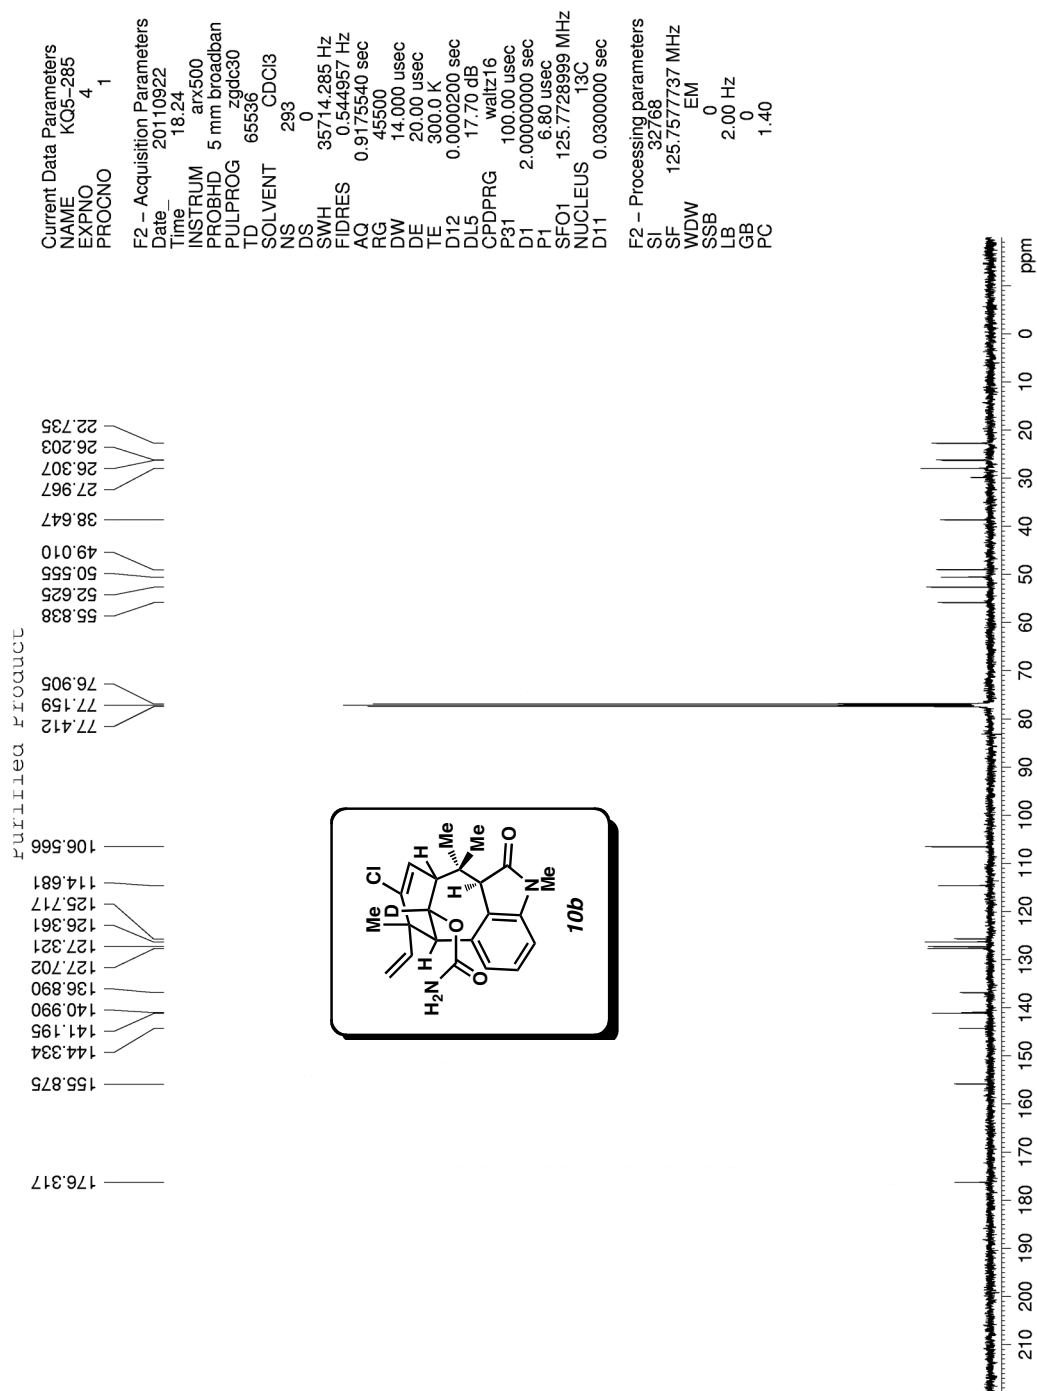

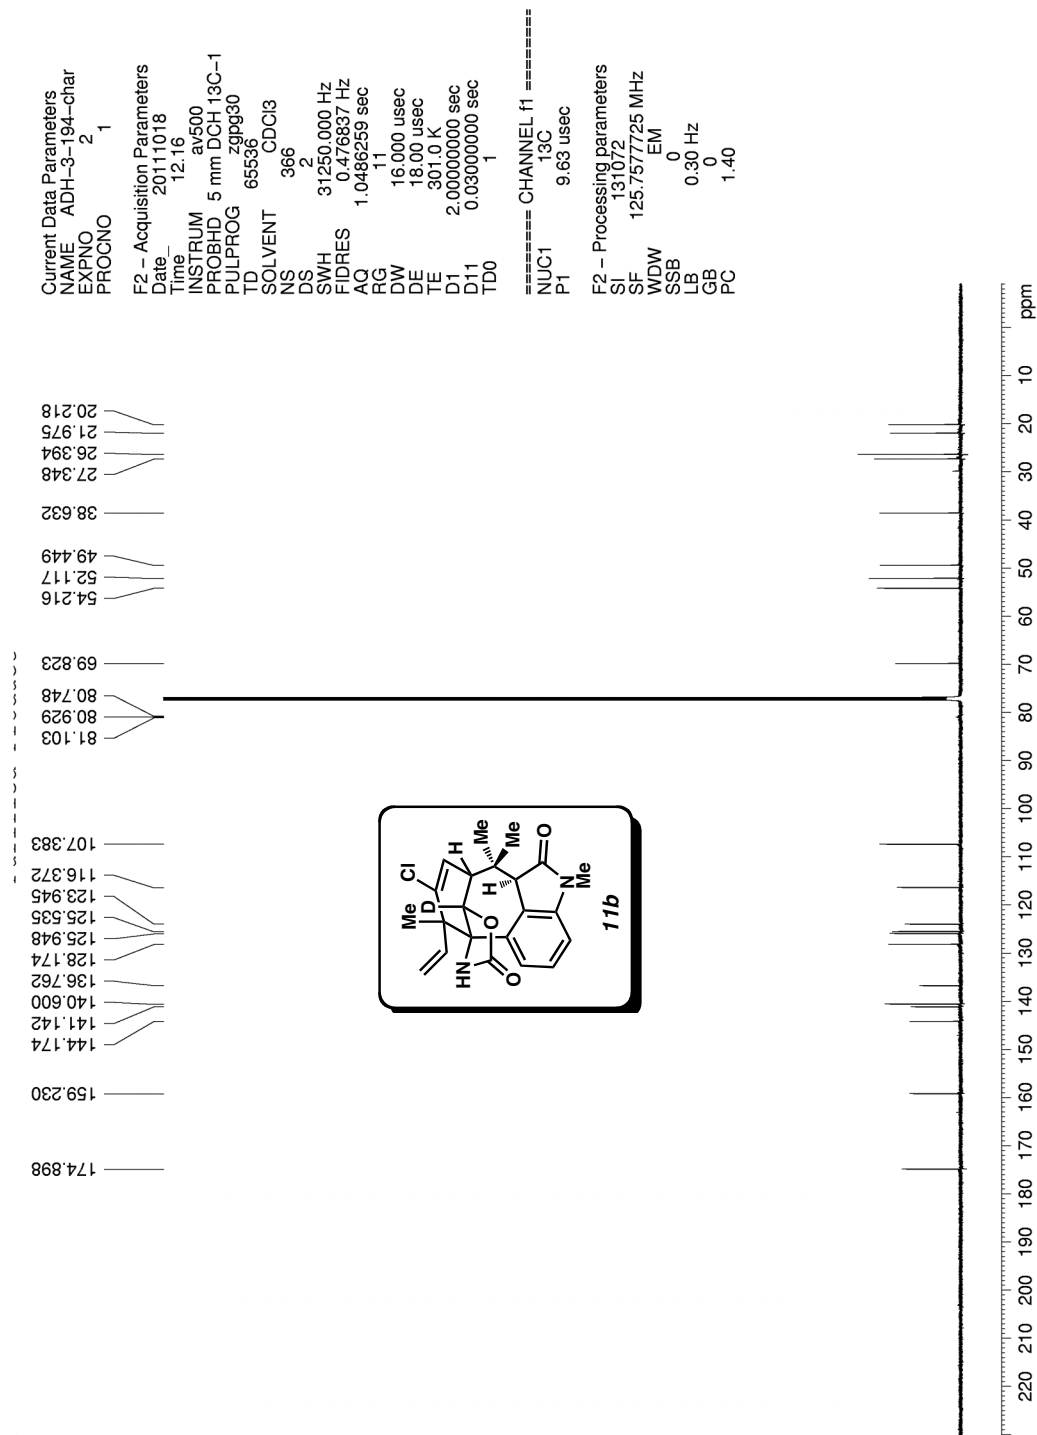

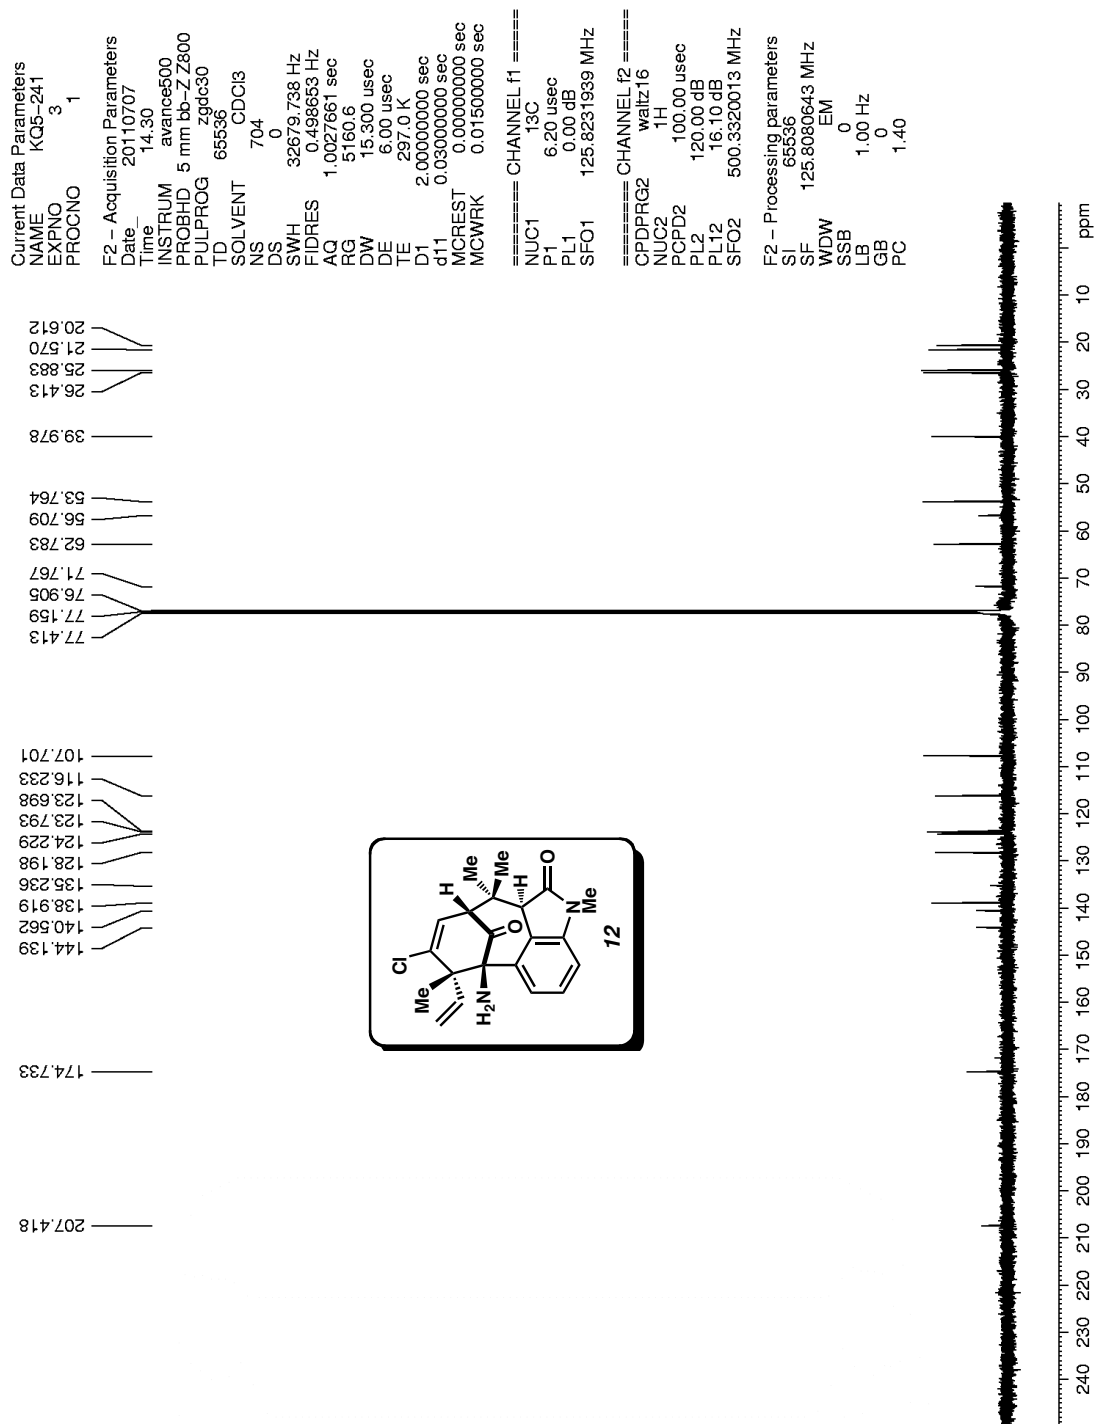

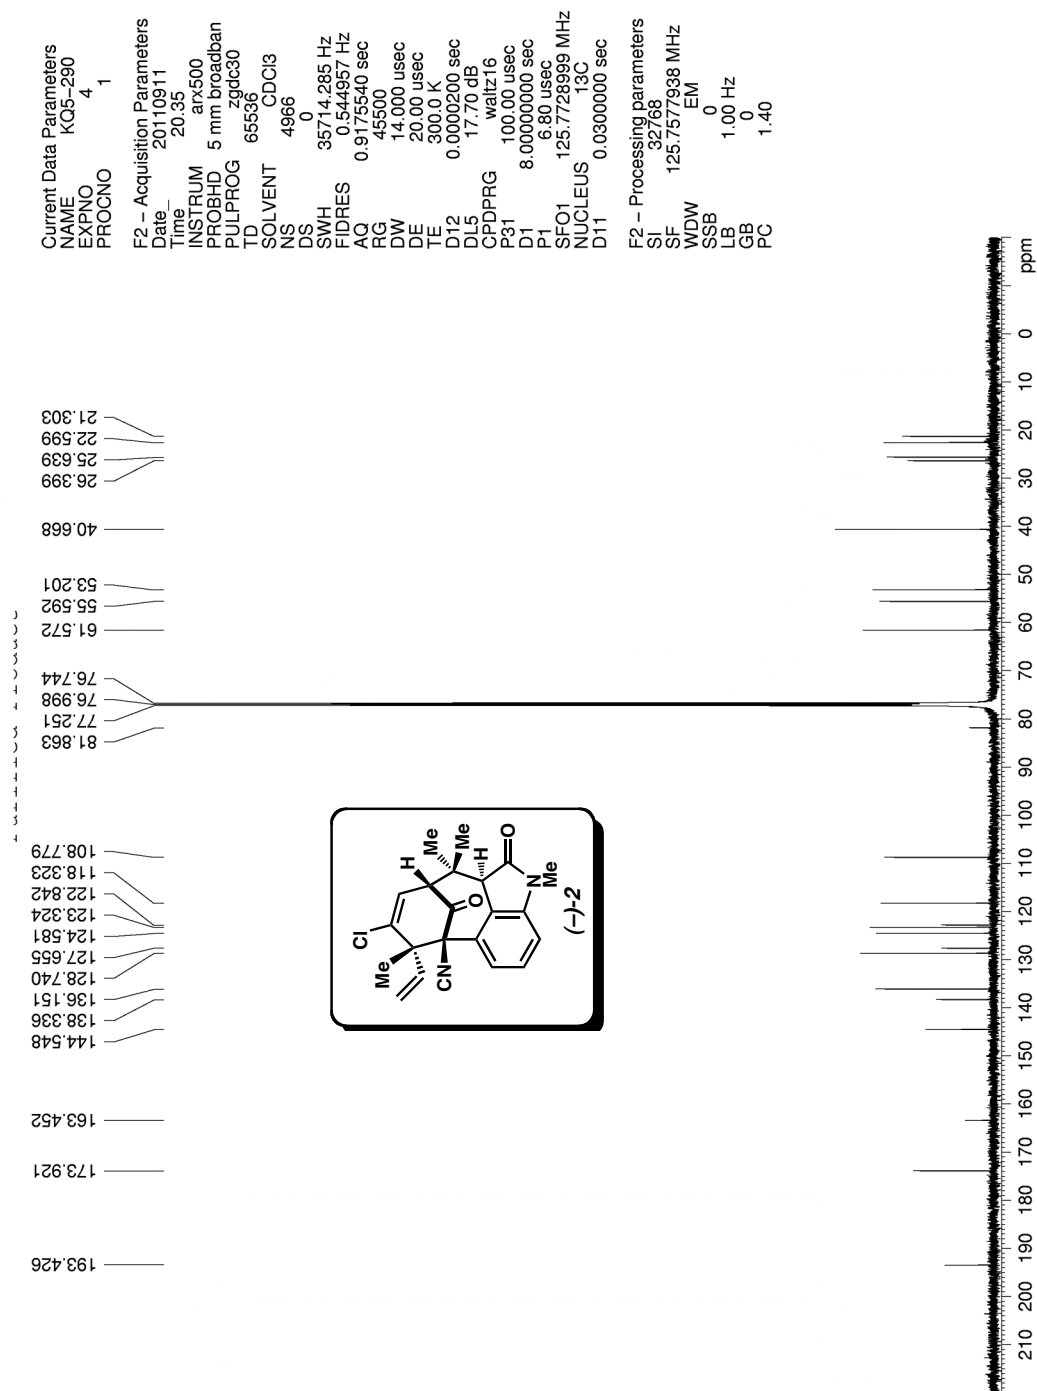

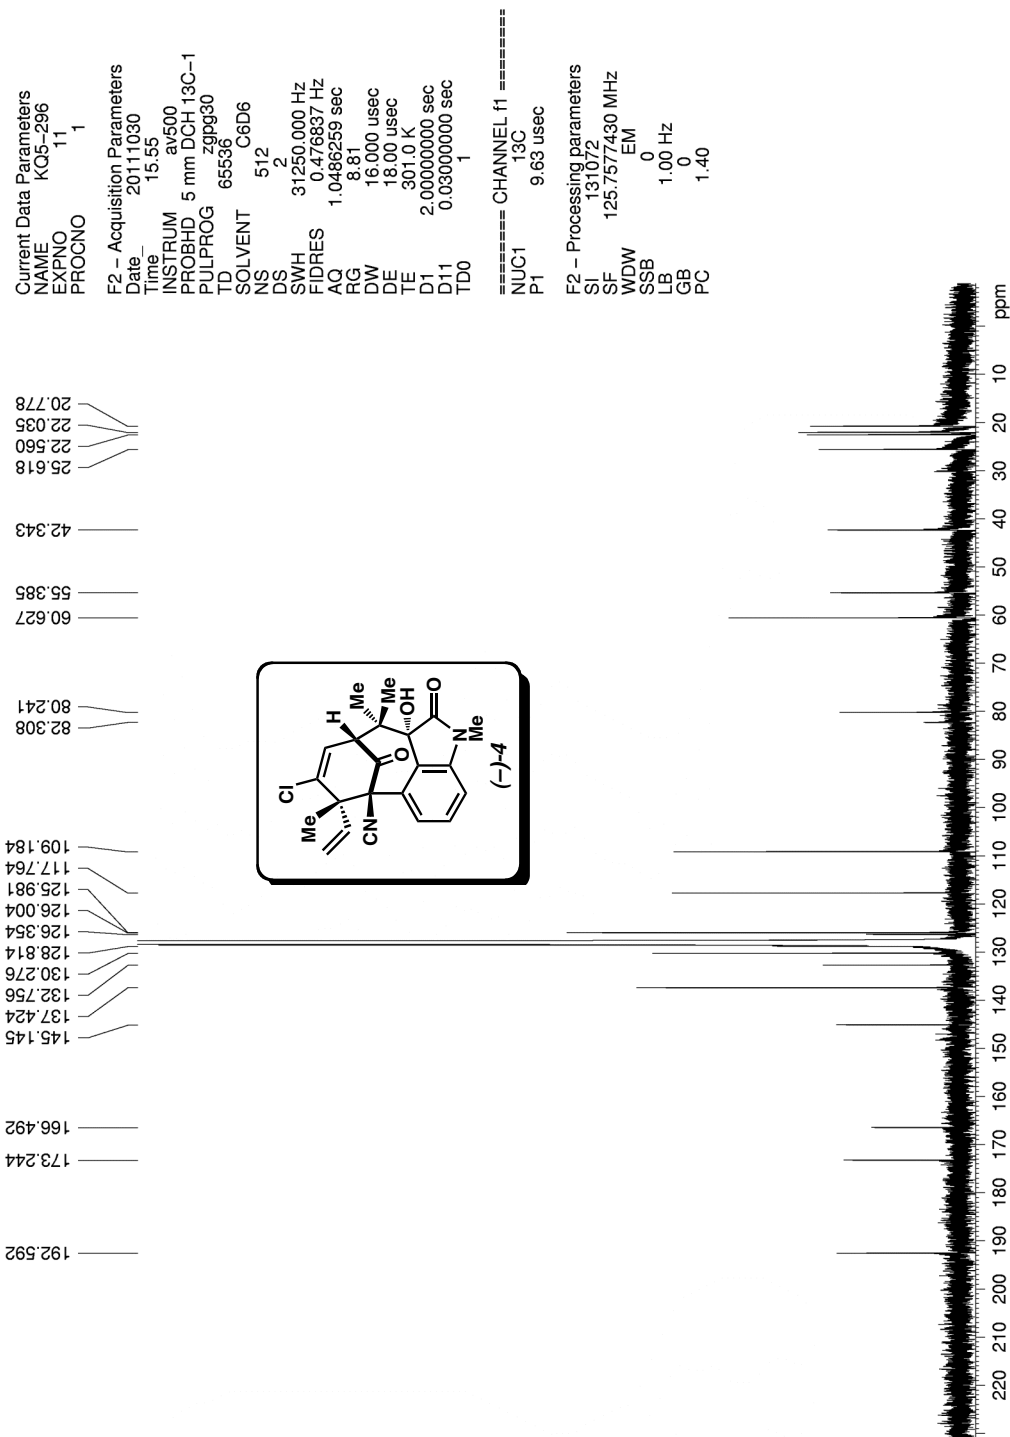

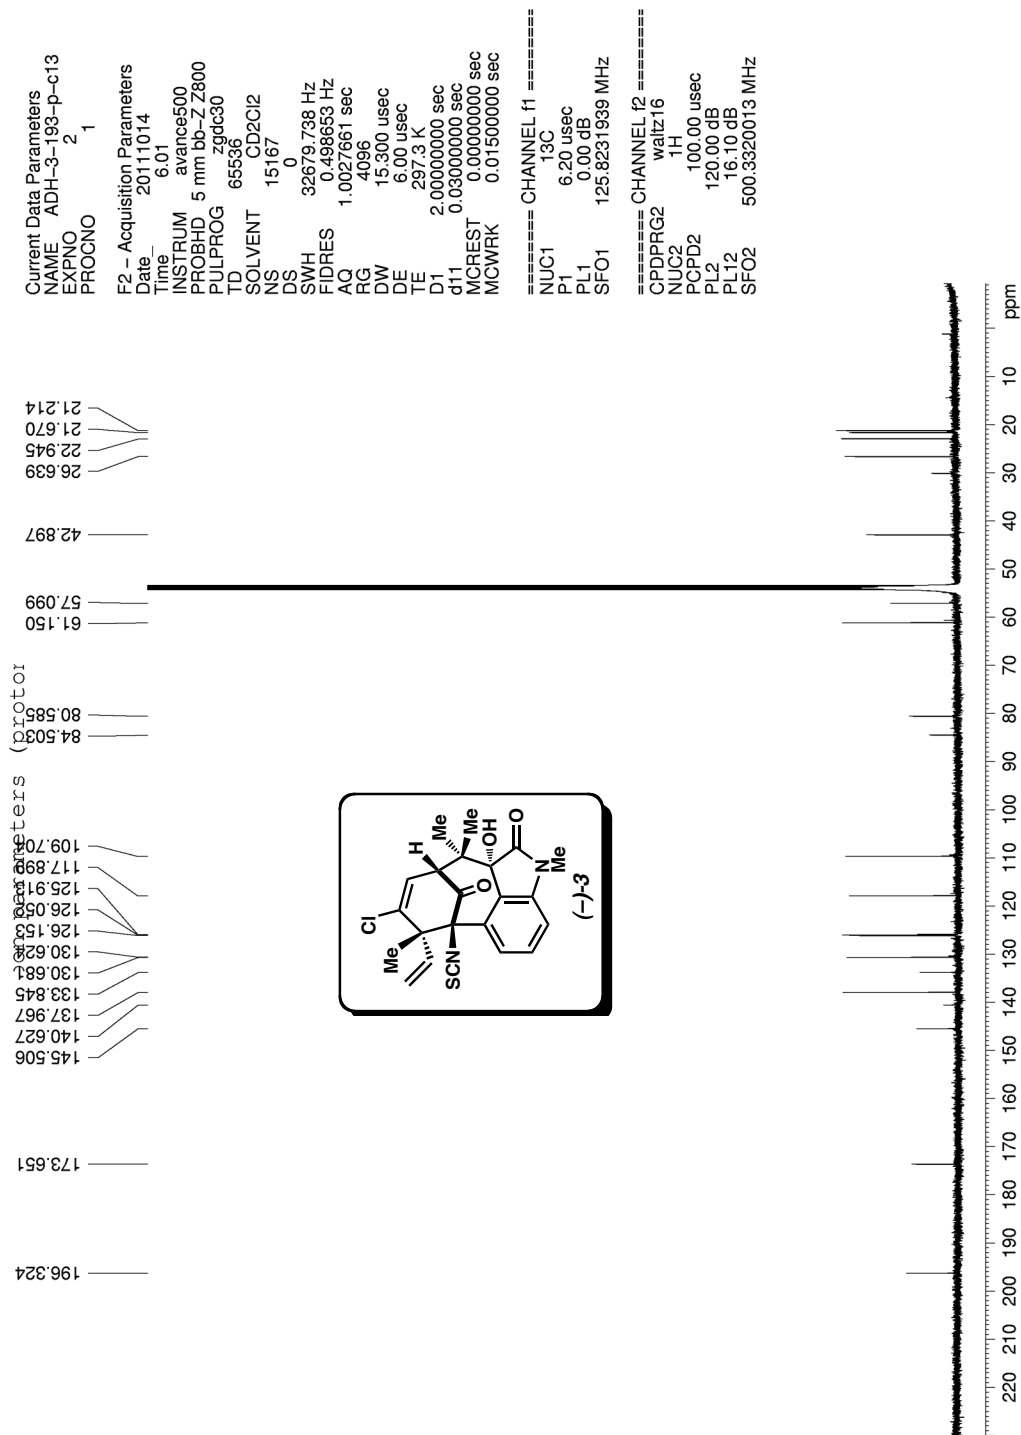



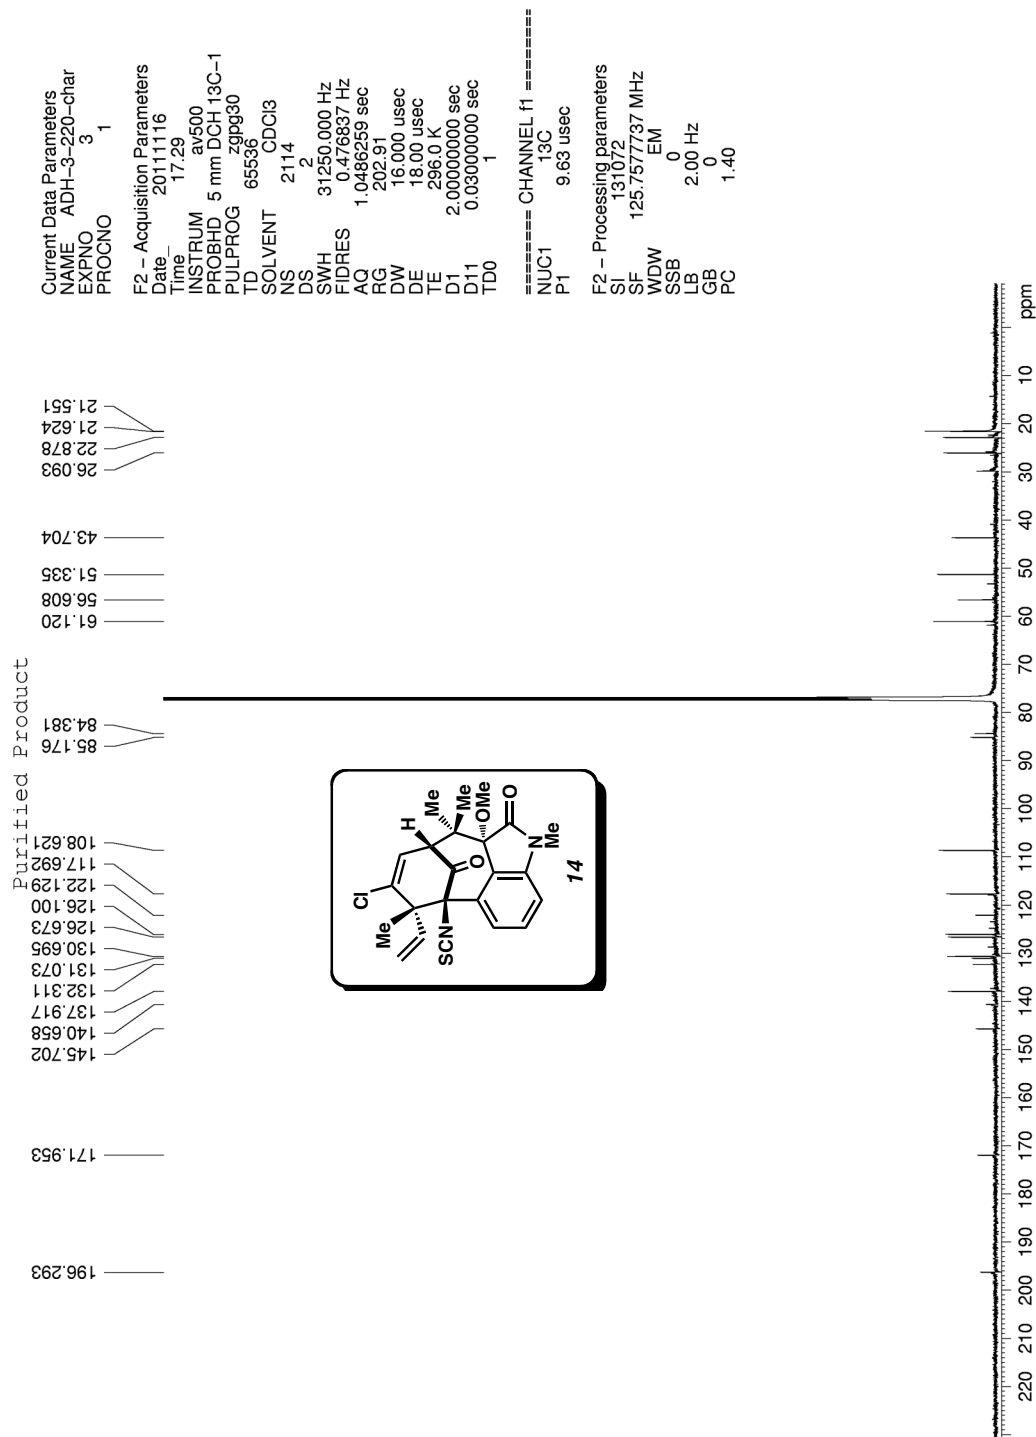

## References.

- <sup>1</sup> Frigerio, M.; Santagostino, M.; Sputore, S. *J. Org. Chem.* **1999**, *64*, 4537–4538.
- <sup>2</sup> Niu, C.; Pettersson, T.; Miller, M. J. *J. Org. Chem.* **1996**, *61*, 1014–1022.
- <sup>3</sup> Hutters, A. D.; Quasdorf, K. W.; Styduhar, E. D.; Garg, N. K. *J. Am. Chem. Soc.* **2011**, *133*, 15797–15799.
- <sup>4</sup> Jimenez, J. L.; Huber, U.; Moore, R. E.; Patterson, G. M. L. *J. Nat. Prod.* **1999**, *62*, 569–572.
- <sup>5</sup> Reported values for specific rotations can be highly variable; for a pertinent discussion, see: Gawley, R. E. *J. Org. Chem.* **2006**, *71*, 2411–2416.
- <sup>6</sup> NMR data for synthetic **3** did not match the tabulated data provided in the original isolation report (see reference 4). However, an authentic sample of **3** was recently located at the University of Hawaii, and subsequent NMR analysis revealed that the NMR data for **3** reported upon isolation was mis-tabulated. Indeed, synthetic **3** matched natural **3** by all spectroscopic means. We thank Philip Williams and Wesley Yoshida (University of Hawaii) for resolving this discrepancy and providing the correct NMR data for natural **3**.
- <sup>7</sup> Lodewyk, M. W.; Siebert, M. R.; Tantillo, D. J. “Computational Prediction of <sup>1</sup>H and <sup>13</sup>C chemical Shifts: A Useful Tool for Natural Product, Mechanistic, and Synthetic Organic Chemistry,” *Chem. Rev.* in press. DOI: dx.doi.org/10.1021/cr200106v
- <sup>8</sup> G09: Gaussian 09, Revision B.01, Frisch, M. J.; Trucks, G. W.; Schlegel, H. B.; Scuseria, G. E.; Robb, M. A.; Cheeseman, J. R.; Scalmani, G.; Barone, V.; Mennucci, B.; Petersson, G. A.; Nakatsuji, H.; Caricato, M.; Li, X.; Hratchian, H. P.; Izmaylov, A. F.; Bloino, J.; Zheng, G.; Sonnenberg, J. L.; Hada, M.; Ehara, M.; Toyota, K.; Fukuda, R.; Hasegawa, J.; Ishida, M.; Nakajima, T.; Honda, Y.; Kitao, O.; Nakai, H.; Vreven, T.; Montgomery, Jr., J. A.; Peralta, J. E.; Ogliaro, F.; Bearpark, M.; Heyd, J. J.; Brothers, E.; Kudin, K. N.; Staroverov, V. N.; Kobayashi, R.; Normand, J.; Raghavachari, K.; Rendell, A.; Burant, J. C.; Iyengar, S. S.; Tomasi, J.; Cossi, M.; Rega, N.; Millam, N. J.; Klene, M.; Knox, J. E.; Cross, J. B.; Bakken, V.; Adamo, C.; Jaramillo, J.; Gomperts, R.; Stratmann, R. E.; Yazyev, O.; Austin, A. J.; Cammi, R.; Pomelli, C.; Ochterski, J. W.; Martin, R. L.; Morokuma, K.; Zakrzewski, V. G.; Voth, G. A.; Salvador, P.; Dannenberg, J. J.; Dapprich, S.; Daniels, A. D.; Farkas, Ö.; Foresman, J. B.; Ortiz, J. V.; Cioslowski, J.; Fox, D. J. Gaussian, Inc., Wallingford CT, **2009**.
- <sup>9</sup> (a) Becke, A. D. *J. Chem. Phys.* **1993**, *98*, 1372–1377. (b) Becke, A. D. *J. Chem. Phys.* **1993**, *98*, 5648–5652. (c) Lee, C.; Yang, W.; Parr, R. G. *Phys. Rev. B* **1988**, *37*, 785–789. (d) Stephens, P. J.; Devlin, F. J.; Chabalowski, C. F.; Frisch, M. J. *J. Phys. Chem.* **1994**, *98*, 11623–11627. (e) Tirado-Rives, J.; Jorgensen, W. L. *J. Chem. Theory Comput.* **2008**, *4*, 297–306.

<sup>10</sup> (a) London, F. *J. Phys. Radium* **1937**, *8*, 397–409. (b) McWeeny, R. *Phys. Rev.* **1962**, *126*, 1028–1034. (c) Ditchfield, R. *Mol. Phys.* **1974**, *27*, 789–807. (e) Wolinski, K.; Hilton, J. F.; Pulay, P. *J. Am. Chem. Soc.* **1990**, *112*, 8251–8260. (f) Cheeseman, J. R.; Trucks, G. W.; Keith, T. A.; Frisch, M. J. *J. Chem. Phys.* **1996**, *104*, 5497–5509.

<sup>11</sup> Adamo, C.; Barone, V. *J. Chem. Phys.* **1998**, *108*, 664–675.

<sup>12</sup> Marenich, A. V.; Cramer, C. J.; Truhlar, D. G. *J. Phys. Chem.* **2009**, *113*, 6378–6396.

<sup>13</sup> *Spartan '10*; Wavefunction, Inc., Irvine, CA.

<sup>14</sup> Smith, S. G.; Goodman, J. M. *J. Am. Chem. Soc.* **2010**, *132*, 12946–12959. Use of the DP4 analysis is quite practical, owing to a versatile Java applet that the Goodman group has made available online. The current URL is: <http://www-jmg.ch.cam.ac.uk/tools/nmr/nmrParameters.html>
